# Supplementary material for: Wnt4 and ephrinB2 instruct apical constriction via Dishevelled and non-canonical signaling
Source: PubMed Central journal article supplement (PMC9860048; doi:10.1038/s41467-023-35991-6), 2023-01-20
Supplement: 41467_2023_35991_MOESM1_ESM.pdf [file 41467_2023_35991_MOESM1_ESM.pdf]

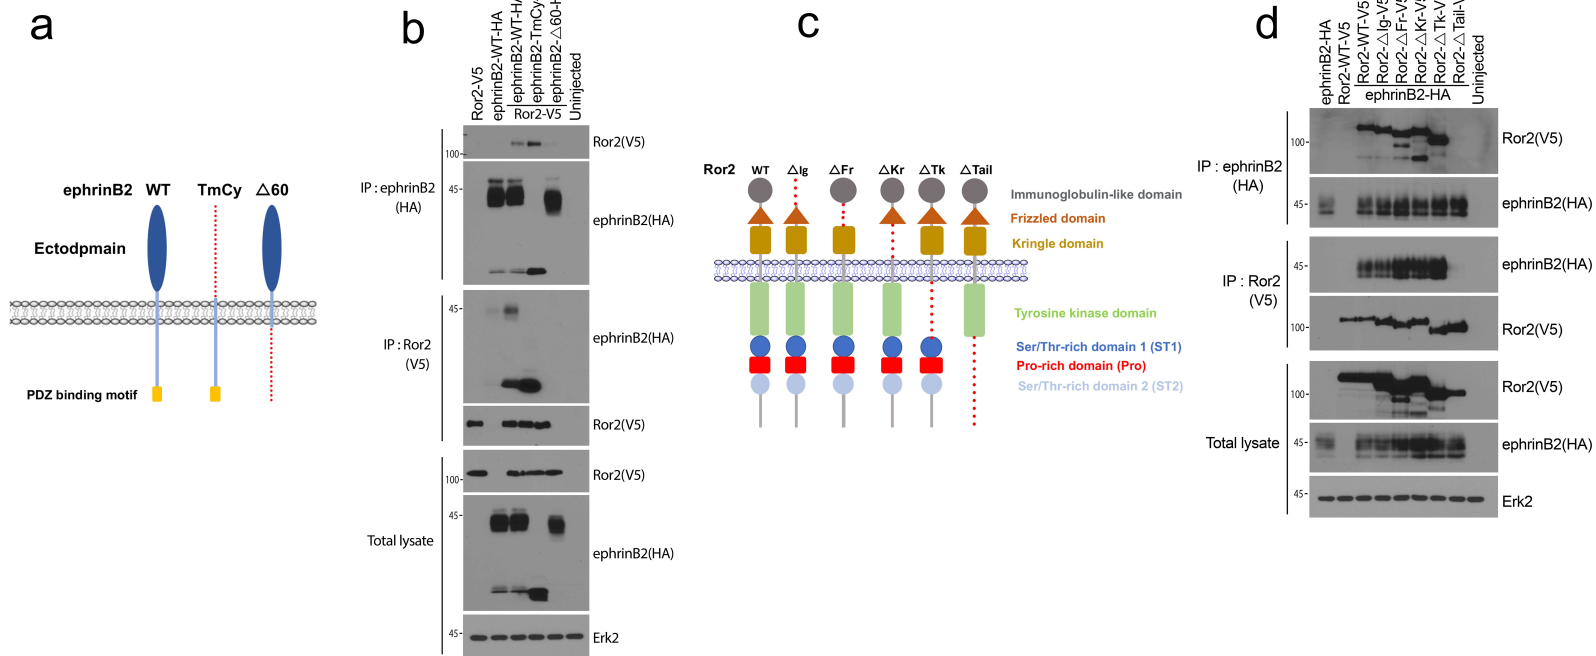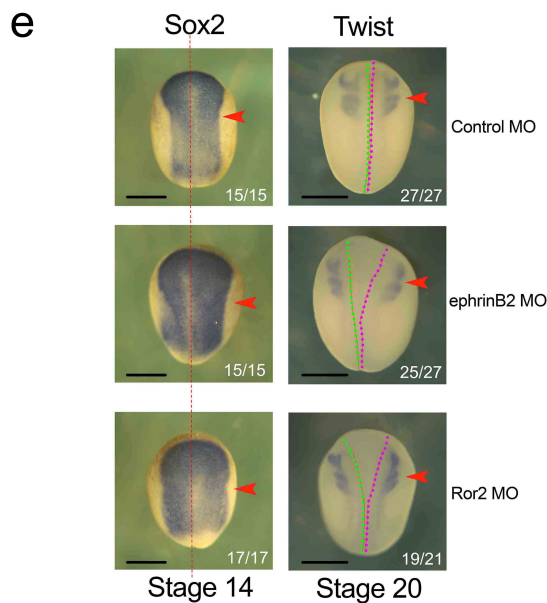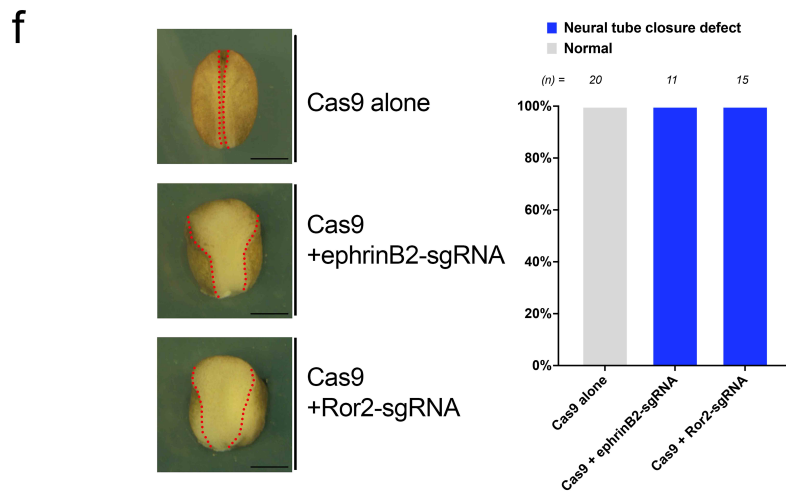

| Target gene | location | genomic DNA sequences                                                                                                                                                                                                                                                                                                                                                                                 |
|-------------|----------|-------------------------------------------------------------------------------------------------------------------------------------------------------------------------------------------------------------------------------------------------------------------------------------------------------------------------------------------------------------------------------------------------------|
| ephrinB2    | Exon 1   | CGAAACGTTGCGTTTGGTCAGTGTAGTTTCTGGGGCGGCCAGATCATGGCACTGACGGGGACTCGGTGTGGAAGTACAGCTGGGAGTTTGTATTCCTTCTGCTCAGGACTGCGATCTCCTGGTCTACAGTGCTGGATCCTATATACTGGAACCTGCAACGCCAGGTAAAGTCCGAGCCCTTTTACTCTTTACGTCAGTGTGTGAGGGCCACATACAGACACGGTGGCACACTTAATCAGCAGTGTGTAATAGATATTAACAGCGTGAAGCGTGTCCCT                                                                                                                |
| Ror2        | Exon 3   | GGCCTGTCTTCCCAACCGTGATCTGACCCCTTTTGAATTTCTTCTCCCAACGATACTATTGACGTTTCTAGAACCCTGTGAACAATATACAAATTGTGCAAGGTCAGGCAGCAACACTCCATTGCAAAAGTCCGGGAATCCACTCCCAATGTAAAGTGGCTGAAGAACGATGACACTGTGGTTTCAGGAGCCCAAGAGAATTACCAATTAGGAAAACAGACTACGGCTCAGATTACGGATACAAGACCTGGACACCACCGACACTGGCTATTATCAGTGTGTCCGCCCAATGGGATAAAGACCATTACTGCAACTGGAGTCCCTTTGTATAGGCTTGTAAGCTTTACTGTGCATTATAATTAATAACAGACATGGCAAAGGAAGTAGTT |

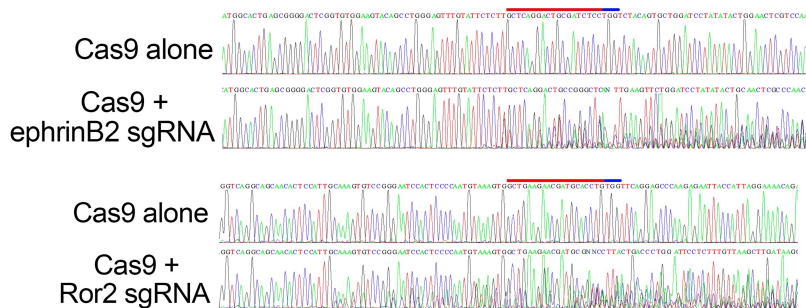

**Supplementary Fig. 1. Ror2 interacts with ephrinB2 and regulates neural tube closure.**

(a) Schematic of ephrinB2 deletion mutants. (b) Co-IP with Ror2 and the ephrinB2 deletion mutants at stage 13 embryos. (c) Schematic of Ror2 conserved domain deletion mutants. (d) Co-IP with ephrinB2 and the Ror2 conserved domain deletion mutants at stage 13 embryos. (e) *in situ* hybridization against the neuronal cell marker, *Sox2* and cranial neural crest marker, *Twist*. MOs were injected into D1.1 blastomere at the 16-cell stage embryos. Red dot lines indicate the midline of neural plate. The lateral boundaries of the neural plate are marked by dot lines (green; uninjected side and magenta; injected side). Red arrow heads indicate injected side. Number of embryos showing representative data/total number of analyzed embryos. Scale bar, 500 $\mu$ m. (f) Representative embryo phenotypes of ephrinB2 or Ror2 knockout embryos. See also Supplementary Movie. 2. Histogram depicts quantification of the phenotypes. The lateral boundaries of the neural plate are marked by red dot lines. Scale bar, 500 $\mu$ m. Genomic DNA information for CRISPR/Cas9 knockout. Red indicates the sgRNA target site, Intron in gray, exon in black, and PAM sequences in blue. Confirmation of ephrinB2 or Ror2 genetic disruption by DNA-sequencing of the amplified genomic DNA from F0 knockout embryos.

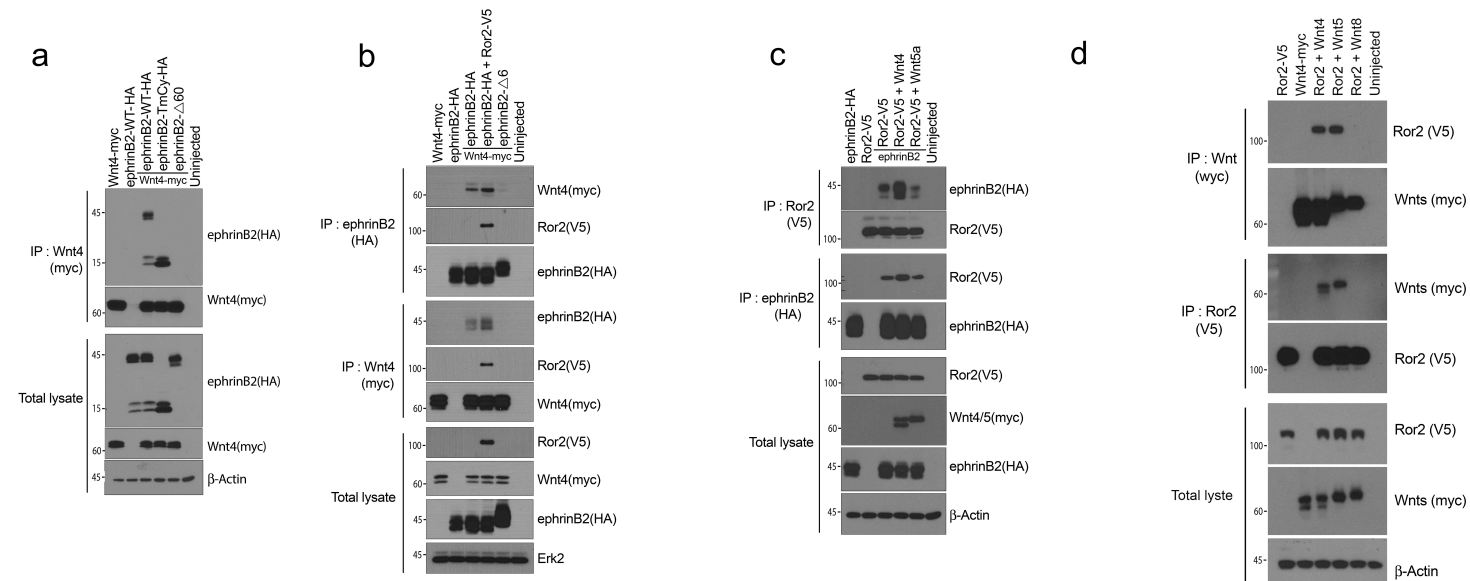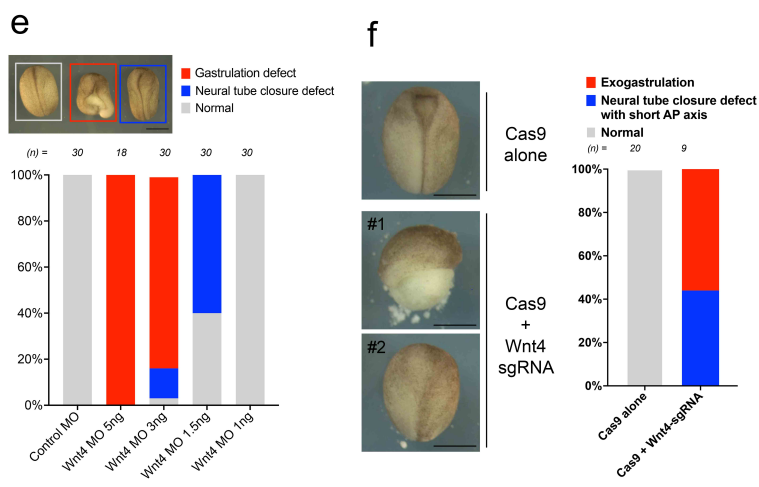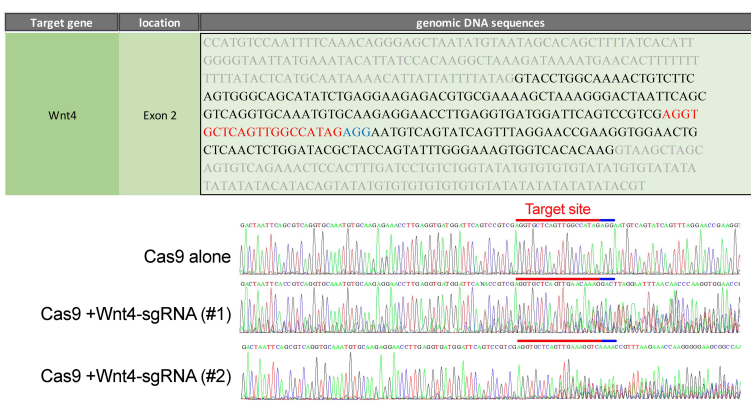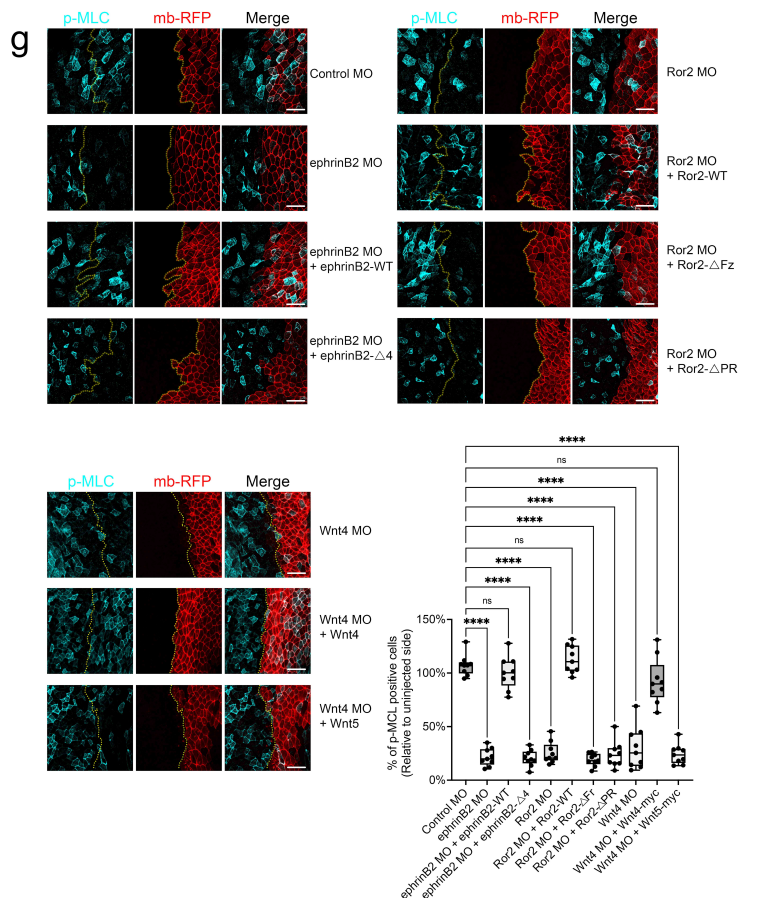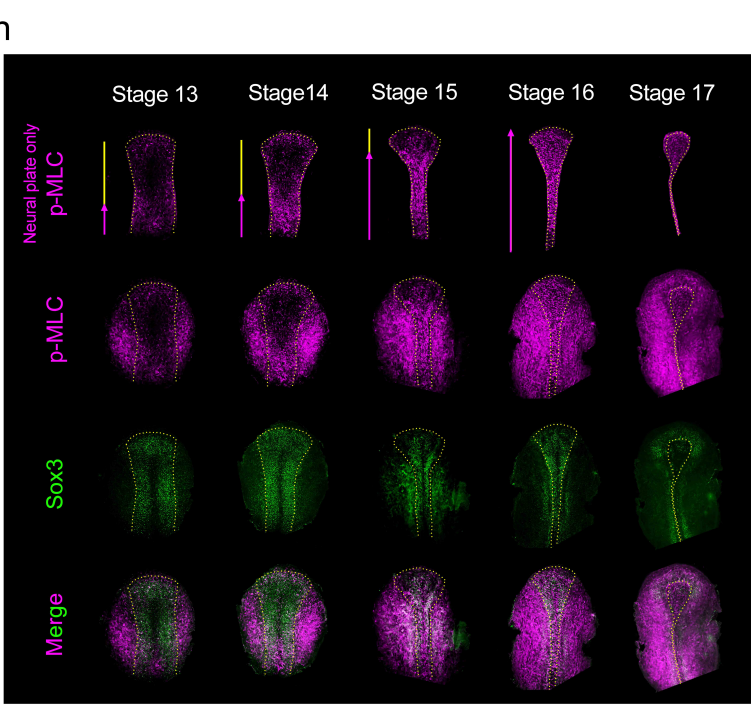

**Supplementary Fig. 2. Wnt4 interacts with ephrinB2 and regulates apical constriction.**

(a) Co-IP with Wnt4 and the ephrinB2 deletion mutants (See Supplementary Fig. 1a) at stage 13 embryos. (b) Co-IP with Wnt4 and the ephrinB2 in the presence of exogenously expressed Ror2. (c) Co-IP with Ror2 and the ephrinB2 in the presence of exogenously expressed Wnt4 or Wnt5. (d) Co-IP with Ror2 and Wnt ligands, Wnt4, 5, and 8. (e) Representative embryo morphologies by Wnt4 knockdown. The histogram depicts the quantification of the phenotypes. MOs were injected into D1.1 blastomere at the 16 cell stage embryos. Scale bar, 500 $\mu$ m (f) Representative embryo phenotypes of Wnt4 knockout embryos. See also Supplementary Movie. 5. Histogram depicts quantification of the phenotypes. Genomic DNA information for CRISPR/Cas9 knockout. Red indicates the sgRNA target site, Intron in gray, exon in black, and PAM sequences in blue. Confirmation of Wnt4 genetic disruption by DNA-sequencing of the amplified genomic DNA from F0 knockout embryos in #1 and #2. Scale bar, 500 $\mu$ m. (g) phospho-MLC levels in neural plates. The box plot shows Min to Max with all data points. Numbers of neural plates/experiments: 9/3 for each column. One-way ANOVAs followed by Dunnett's multiple comparison tests were used. n.s., not significant, \*\*\*\*p < 0.0001. Scale bar, 50 $\mu$ m. (h) Immunostaining of phospho-MLC in developing embryos from stage 13 to 17. Sox3 indicates neural plate cells. The yellow dotted lines indicate the border of the neural plate. Scale bar, 500 $\mu$ m.

### a Xenopus Dsh2

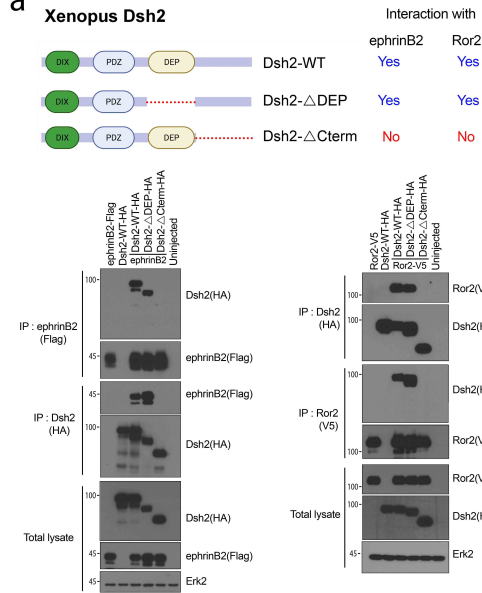

### b

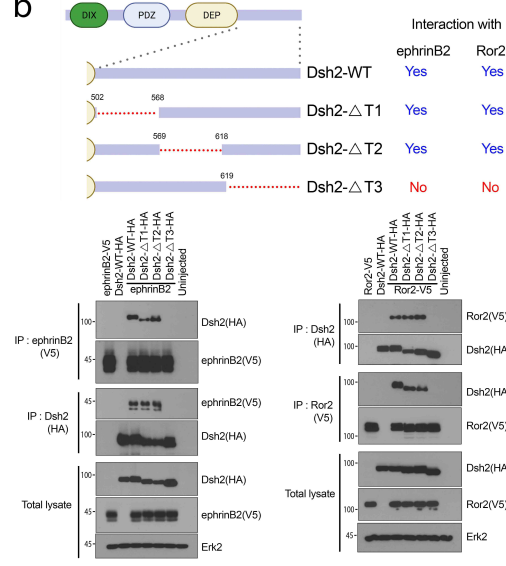

### c

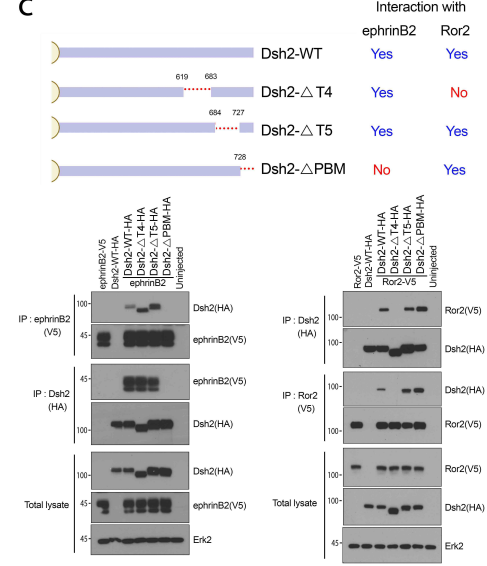

### d

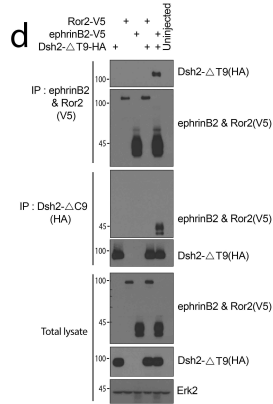

### e

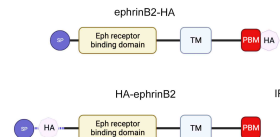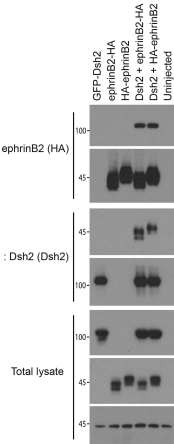

### f

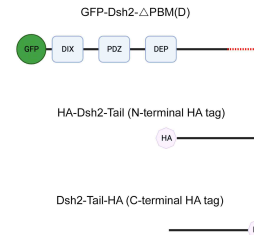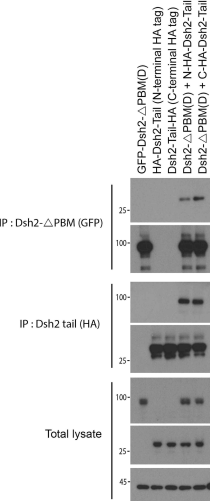

### g

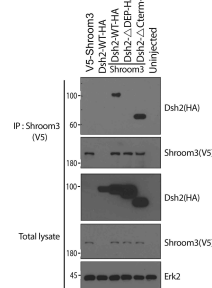

### h

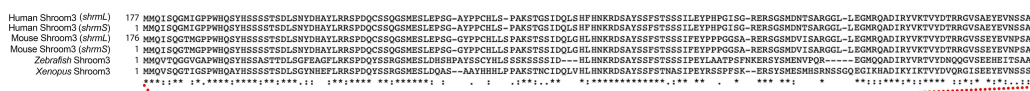

Serine-proline rich region (SPR)

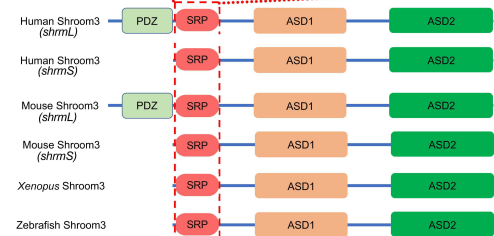

### i

#### Xenopus Shroom3 deletion mutants

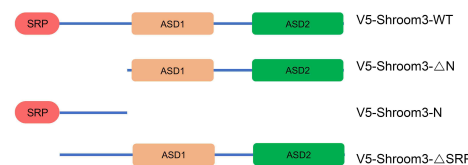

### j

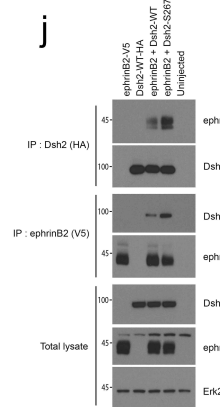

### k

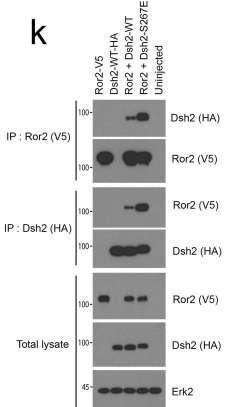

**Supplementary Fig. 3. Dsh2 mediates the formation of the WERDS protein complex.**

(a) Schematic of Dsh2 conserved domain deletion mutants. Left: Co-IP assay with ephrinB2 and the Dsh2 deletion mutants at Stage 13 *Xenopus* embryos. Right: Co-IP assay with Ror2 and the Dsh2 deletion mutants. (b) Schematic of Dsh2 C-terminal region deletion mutants. Left: Co-IP assay with ephrinB2 and the Dsh2 deletion mutants. Right: Co-IP assay with Ror2 and the Dsh2 deletion mutants. (c) Schematic of Dsh2 C-terminal region deletion mutants. Left: Co-IP assay with ephrinB2 and the Dsh2 deletion mutants. Right: Co-IP assay with Ror2 and the Dsh2 deletion mutants. (d) Co-IP assay with Dsh2- $\Delta$ T9 and ephrinB2, Ror2. (e) Co-IP assay with GFP-Dsh2 and N- or C-terminal HA tagged ephrinB2. (f) Co-IP assay with GFP-Dsh2- $\Delta$ PBM and N- or C-terminal HA tagged Dsh2-tail. (g) Co-IP assay with Shroom3 and Dsh2 conserved domain deletion mutants. See also Supplementary Fig. 3a. (h) a multiple sequence alignment of shroom3 across different species (Human, Mouse, *Zebrafish*, and *Xenopus*). PDZ; PDZ domain, ASD1 or 2; Apx/Shroom domains 1 or 2. The red dotted line box indicates the serine-proline rich region (SPR). (i) Schematic of *Xenopus* Shroom3 deletion mutants. (j) Co-IP assay with ephrinB2 and WT-Dsh2-HA or Dsh2-S267E-HA mutant. (k) Co-IP assay with Ror2 and WT-Dsh2-HA or Dsh2-S267E-HA mutant.

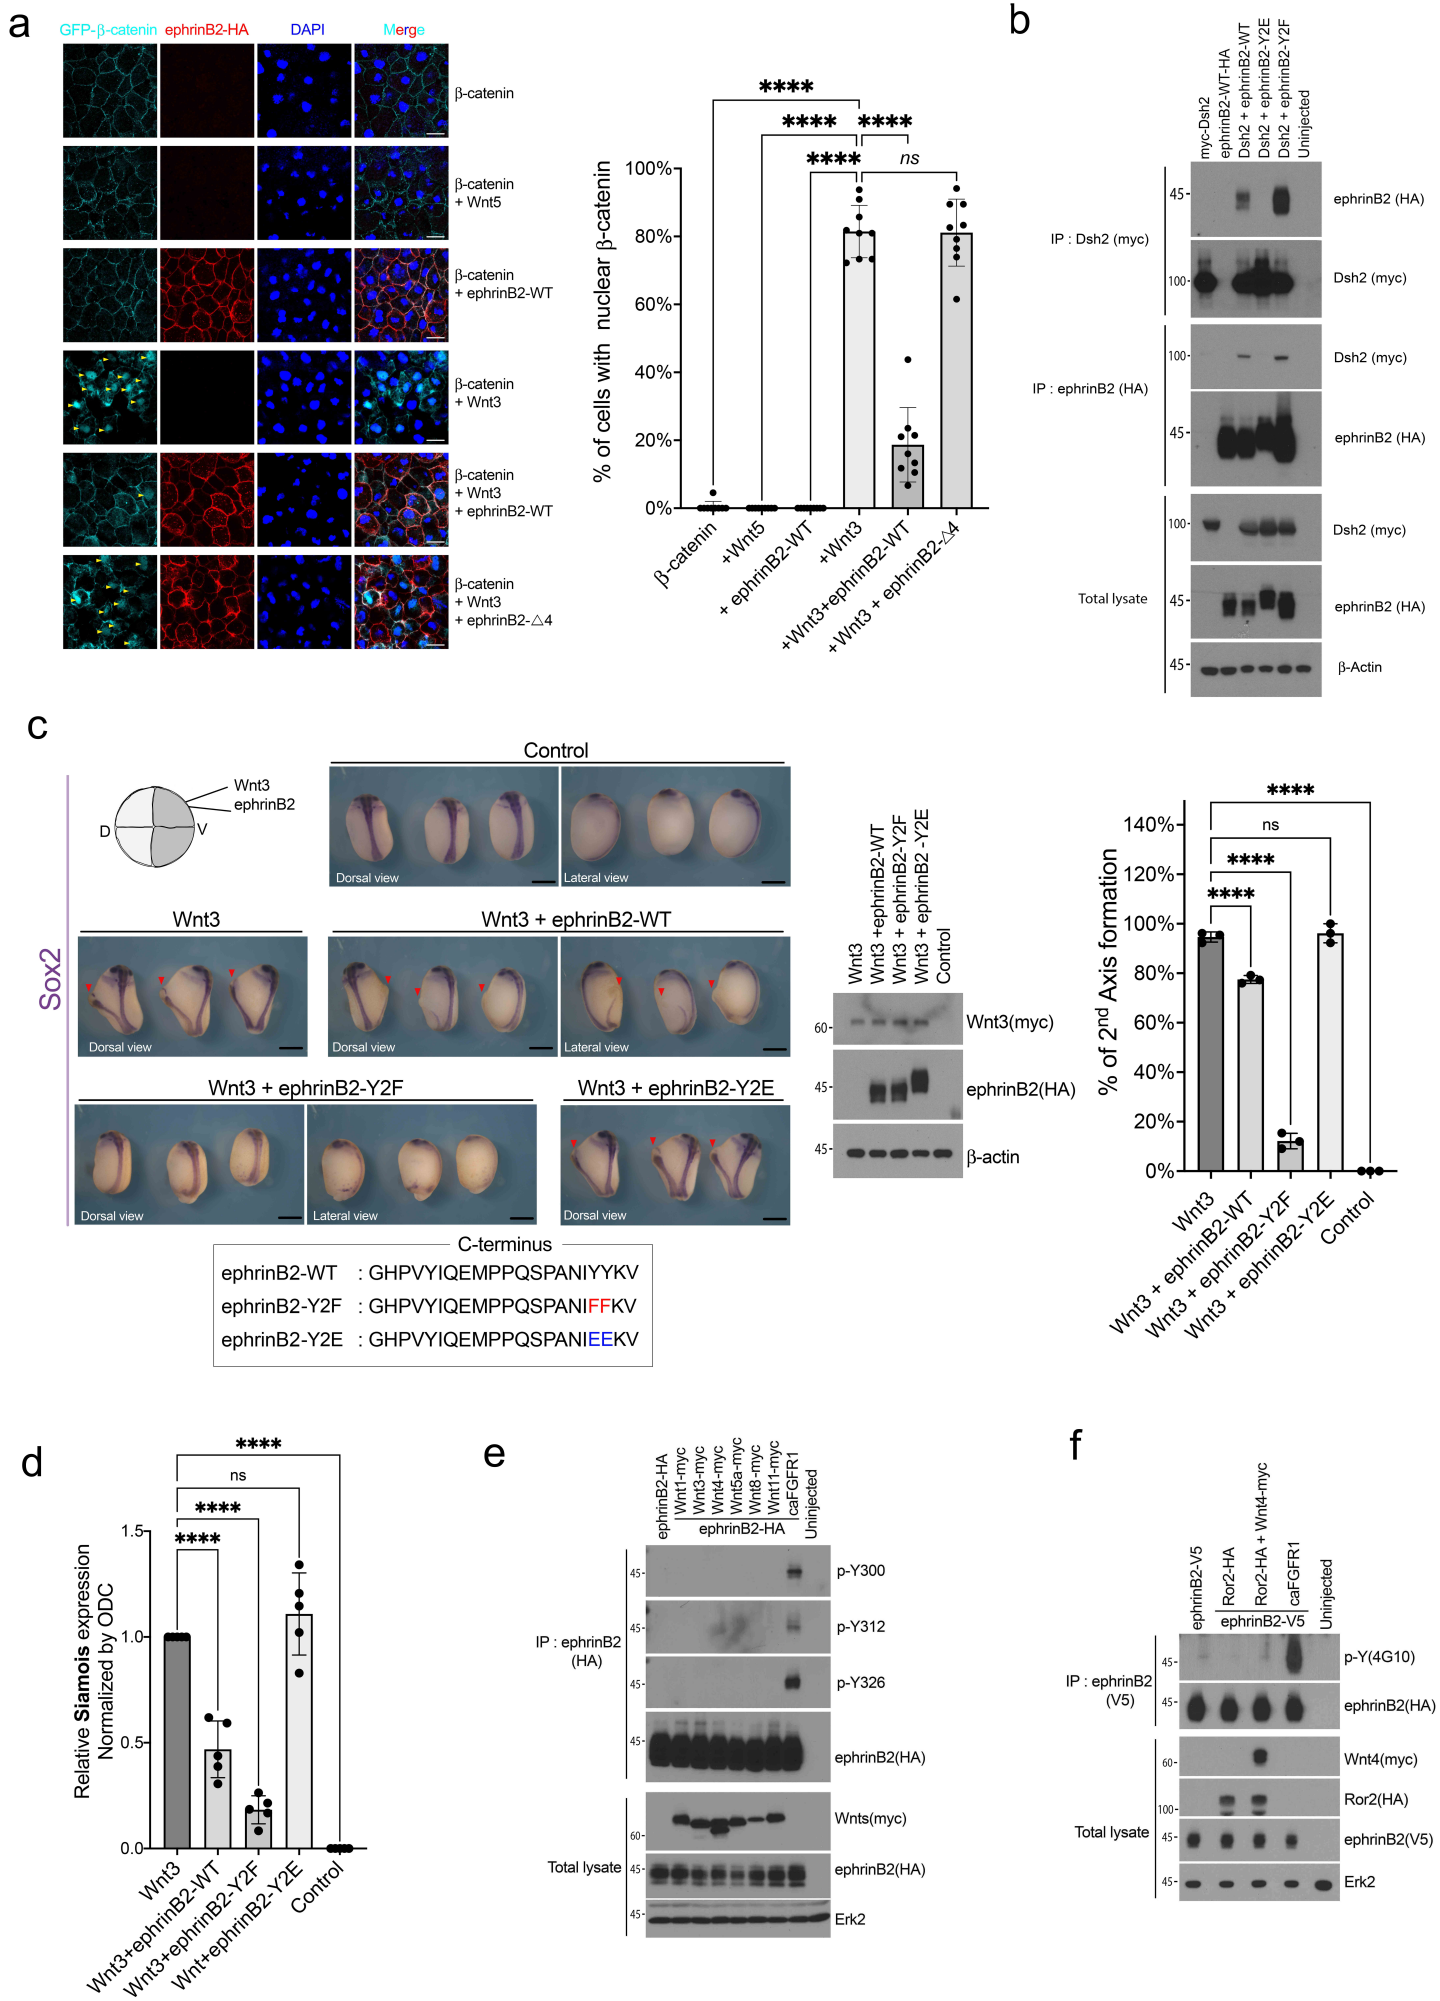

**Supplementary Fig. 4. ephrinB2 antagonizes Wnt/ $\beta$ -catenin signaling via interaction with PBM of Dsh2.**

(a) Immunostaining for exogenously expressed GFP- $\beta$ -catenin and ephrinB2-HA in ectodermal explants. Yellow arrowheads indicate the nuclear staining of  $\beta$ -catenin. Data means SEM. Numbers of neural plates/experiments: 9/3 for each column. One-way ANOVAs followed by Dunnett's multiple comparison tests were used. n.s., not significant, \*\*\*\*p < 0.0001. Scale bar, 20 $\mu$ m. (b) Co-IP assay with myc-Dsh2 and ephrinB2-WT-HA, ephrinB2-Y2E-HA or ephrinB2-Y2F. (c) Axis duplication assay along with *in situ* hybridization of the neuronal cell marker, *Sox2*. RNAs were injected into one side of the ventral marginal zone (VMZ) in the 4 cell stage embryos. Red arrowheads indicate the secondary axis. Immunoblotting represents the expression level of Wnt3 (0.5 pg) and ephrinB2 (100 pg). Data means SEM. Numbers of embryos/experiments: 74/3, 71/3, 73/3, 77/3, and 80/3 from left to right for each column. One-way ANOVAs followed by Dunnett's multiple comparison tests were used. n.s., not significant, \*\*\*\*p < 0.0001. Scale bar, 500 $\mu$ m. (d) *Siamois* expression levels by Quantitative RT-PCR assay in ectodermal explants at stage 10. (e) Level of phospho-Tyrosine in ephrinB2 by Immunoblots using specific phospho-tyrosine Abs (pY300, pY312, or pY326) at stage 13 embryos. (f) Level of phospho-Tyrosine in ephrinB2 by Immunoblots using pan-phospho-tyrosine antibodies (4G10).



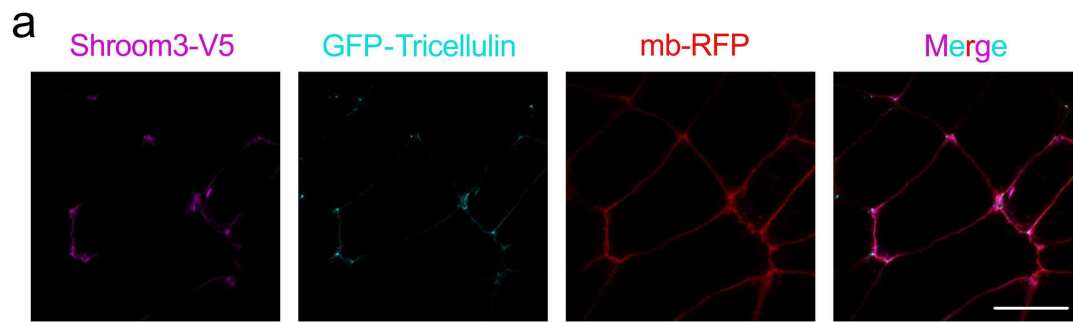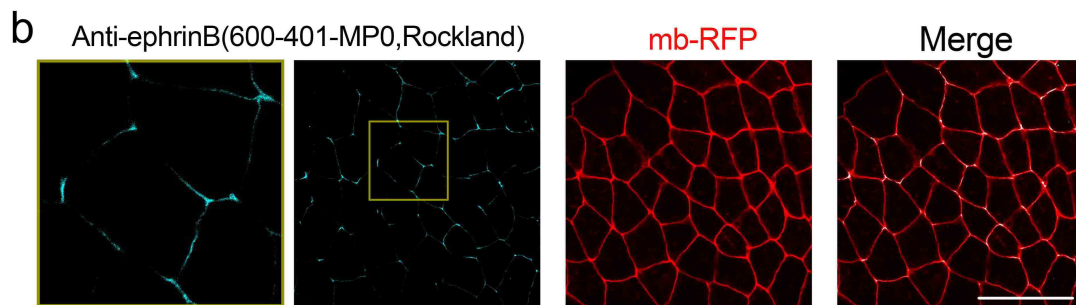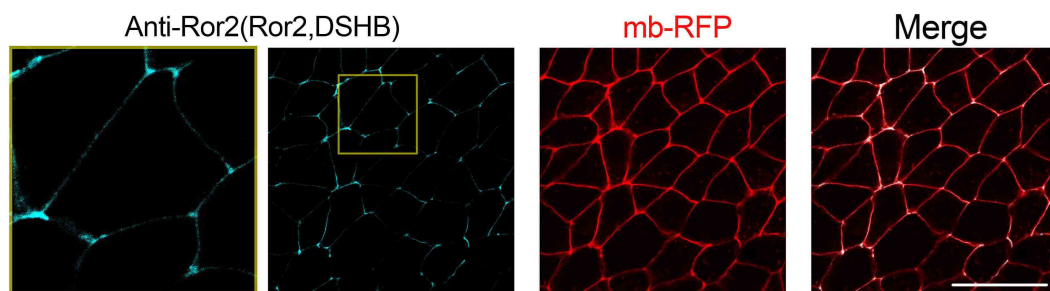

**Supplementary Fig. 5. WERDS localizes at tricellular junctions during apical constriction.**

(a) Representative images of Shroom3 (Magenta) subcellular localization in neural plate cells of Stage 15 embryos. Exogenously expressed GFP-Tricellulin (Cyan) marked the Tricellular junctions. Membrane-RFP labeled cell boundaries. Scale bar, 10 $\mu$ m. (b) Representative images of endogenous ephrinB2 or Ror2 subcellular localization in neural plate cells of Stage 15 embryos. Membrane-RFP labeled cell boundaries. Scale bar, 50 $\mu$ m.

**a**

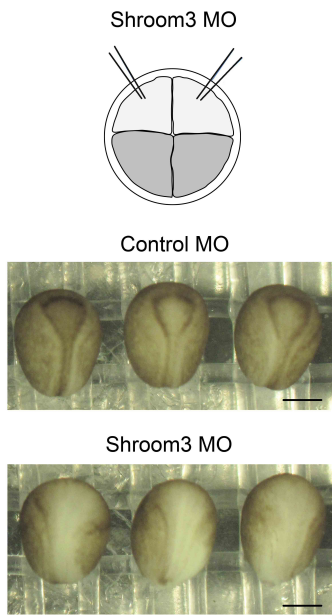

**b**

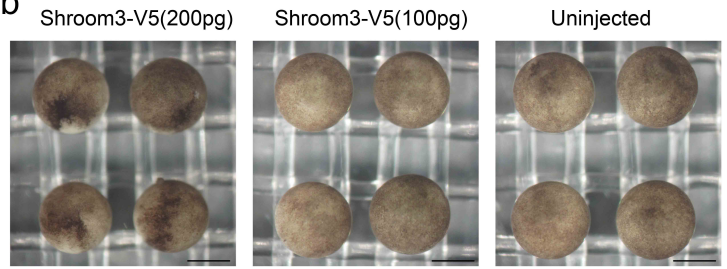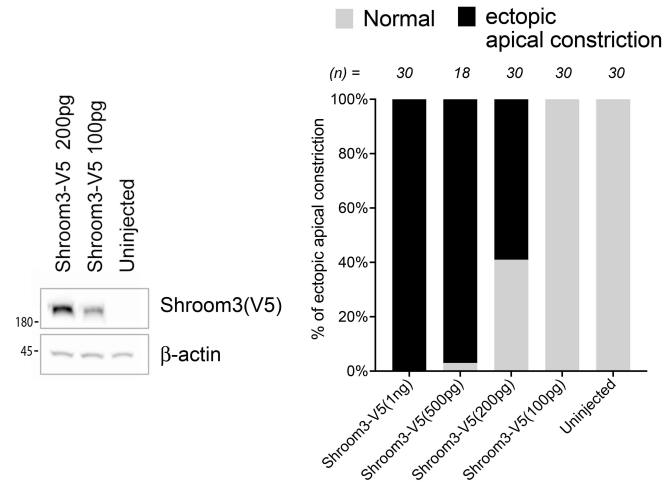

**c**

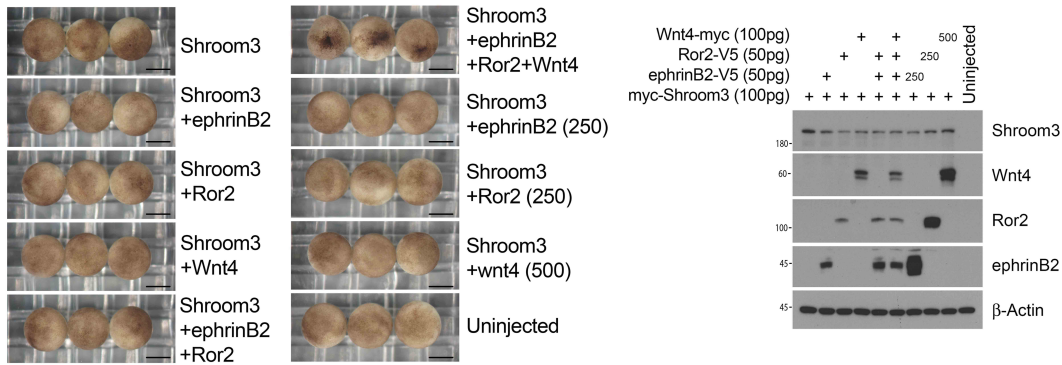

**d**

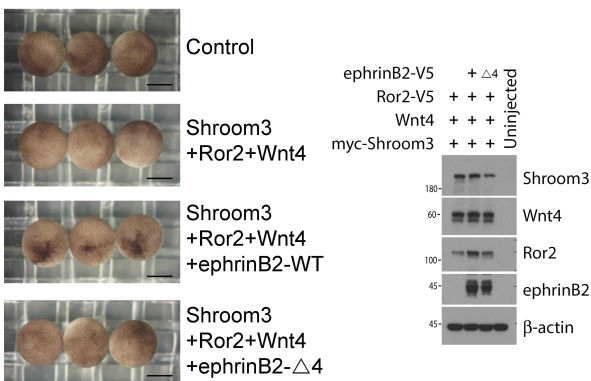

**e**

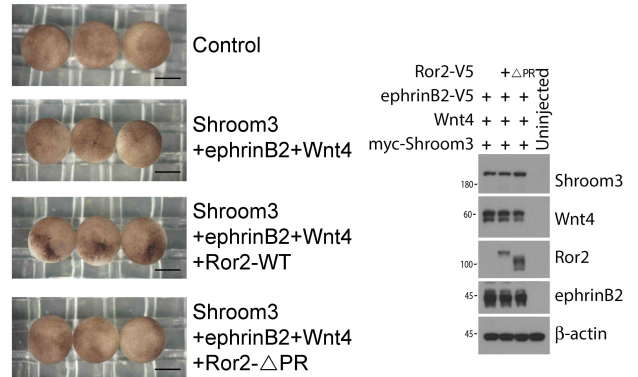

**f**

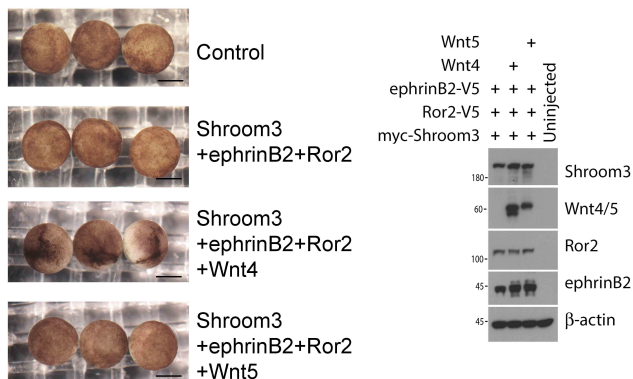

**Supplementary Fig. 6. WERDS signaling complex induces ectopic apical constriction.**

(a) Representative embryo phenotypes of Shroom3 MO knockdown. MOs were injected D1.1 into two blastomeres of the 8-cell stage embryos. The image was taken at stage 16. Scale bar, 500 $\mu$ m.

(b) Representative images of ectopic apical constriction induced by Shroom3. Immunoblotting represents the expression level of Shroom3. The histogram depicts the quantification of the phenotypes. Scale bar, 500 $\mu$ m.

(c) Representative images of ectopic apical constriction by exogenously expressed WERDS complex. Immunoblotting represents the expression level of WERDS components. Scale bar, 500 $\mu$ m.

(d) Ectopic apical constriction analysis with the WERDS complex and ephrinB2- $\Delta$ 4. Scale bar, 500 $\mu$ m.

(e) Ectopic apical constriction analysis with the WERDS complex and Ror2- $\Delta$ PR. Scale bar, 500 $\mu$ m.

(f) Ectopic apical constriction analysis with the WERDS complex and Wnt5a. Scale bar, 500 $\mu$ m.
