# Supplementary material for: Wnt4 and ephrinB2 instruct apical constriction via Dishevelled and non-canonical signaling
Source: Nat Commun. 2023 Jan 20;14:337. doi: 10.1038/s41467-023-35991-6 (PMC9860048; doi:10.1038/s41467-023-35991-6)
Supplement: Supplementary file 4 — Supplementary Data 1 [file 41467_2023_35991_MOESM4_ESM.xlsx]

## Sheet: Sample-info
Poochon Sample ID	Client Sample ID	Sample Description	Received Date	Project	Client	Client Email	Company	Comment	Storage
EC50	Control	IP beads	2021-11-02	915	Jaeho Yoon	jaeho.yoon@nih.gov	NCI Frederick, Ira Daar Lab		4° (PSF04)
EC51	eB2	IP beads	2021-11-02	915	Jaeho Yoon	jaeho.yoon@nih.gov	NCI Frederick, Ira Daar Lab		4° (PSF04)

## Sheet: Protein-list
Accession	Gene	Protein name	Organism	Description	ΣCoverage	Σ# Proteins	Σ# Unique Peptides	Σ# Peptides	Σ# PSMs	Score Control	Coverage Control	# Peptides Control	# PSM Control	Score eB2	Coverage eB2	# Peptides eB2	# PSM eB2	# AAs	MW [kDa]	calc. pI
A0A1L8GLT4	XELAEV_18022892mg	Phosvitin	Xenopus laevis	Phosvitin OS=Xenopus laevis OX=8355 GN=XELAEV_18022892mg PE=4 SV=1 - [A0A1L8GLT4_XENLA]	46.95	2	53	82	424	4.30305	1.87	2	2	1290.82	46.95	82	422	1817	202.99	8.93896
Q6PF53	efnb2.L	Efnb2a protein	Xenopus laevis	Efnb2a protein OS=Xenopus laevis OX=8355 GN=efnb2.L PE=2 SV=1 - [Q6PF53_XENLA]	65.35	5	11	26	317		0			1214.65	65.35	26	317	329	36.3094	8.14795
A0A1L8GLL5	vtga2.L	Phosvitin	Xenopus laevis	Phosvitin OS=Xenopus laevis OX=8355 GN=vtga2.L PE=1 SV=1 - [A0A1L8GLL5_XENLA]	44.77	4	50	70	302	6.82024	3.82	5	5	909.118	44.77	70	297	1807	201.418	9.0415
A0A1L8GFH3	XELAEV_18025047mg	Phosvitin	Xenopus laevis	Phosvitin OS=Xenopus laevis OX=8355 GN=XELAEV_18025047mg PE=4 SV=1 - [A0A1L8GFH3_XENLA]	42.38	1	29	67	262	6.22171	1.91	3	3	757.435	42.38	67	259	1732	193.259	8.93896
B0FLR3	efnb2.S	Ephrin-B2b	Xenopus laevis	Ephrin-B2b OS=Xenopus laevis OX=8355 GN=efnb2.S PE=2 SV=1 - [B0FLR3_XENLA]	44.51	5	1	16	239		0			932.513	44.51	16	239	328	36.3505	8.45557
A0A1L8GLM1	XELAEV_18022891mg	Phosvitin	Xenopus laevis	Phosvitin OS=Xenopus laevis OX=8355 GN=XELAEV_18022891mg PE=4 SV=1 - [A0A1L8GLM1_XENLA]	39.37	2	42	64	210	7.50443	2.09	3	3	584.696	39.37	64	207	1816	202.22	9.1001
A0A1L8GPR2	XELAEV_18024014mg	SH3 domain-containing protein	Xenopus laevis	SH3 domain-containing protein OS=Xenopus laevis OX=8355 GN=XELAEV_18024014mg PE=1 SV=1 - [A0A1L8GPR2_XENLA]	58.51	6	23	39	129	2.2202	4.73	2	2	397.885	58.51	39	127	740	82.6197	6.46826
L7N325	LOC100494633	Phosvitin	Xenopus tropicalis	Phosvitin OS=Xenopus tropicalis OX=8364 GN=LOC100494633 PE=4 SV=4 - [L7N325_XENTR]	19.7	2	3	35	128	2.19183	0.72	1	1	354.653	19.7	35	127	1812	201.428	8.90967
A0A1L8GHQ7	nckipsd.S	SH3 domain-containing protein	Xenopus laevis	SH3 domain-containing protein OS=Xenopus laevis OX=8355 GN=nckipsd.S PE=1 SV=1 - [A0A1L8GHQ7_XENLA]	53.17	2	18	34	121	4.05039	3.37	2	2	411.384	53.17	34	119	741	82.5016	6.46826
A0A1L8FG57	eno1.S	2-phospho-D-glycerate hydro-lyase	Xenopus laevis	2-phospho-D-glycerate hydro-lyase OS=Xenopus laevis OX=8355 GN=eno1.S PE=1 SV=1 - [A0A1L8FG57_XENLA]	66.59	8	4	26	116	12.5733	3.69	1	4	364.372	65.21	25	112	434	47.3844	6.56592
A0A1L8FLY7	eno1.L	2-phospho-D-glycerate hydro-lyase	Xenopus laevis	2-phospho-D-glycerate hydro-lyase OS=Xenopus laevis OX=8355 GN=eno1.L PE=3 SV=1 - [A0A1L8FLY7_XENLA]	66.59	6	3	25	107		0			353.765	66.59	25	107	434	47.3422	6.12549
A0A1L8F5P2	tubb4b.L	Tubulin beta chain	Xenopus laevis	Tubulin beta chain OS=Xenopus laevis OX=8355 GN=tubb4b.L PE=1 SV=1 - [A0A1L8F5P2_XENLA]	72.13	13	1	24	80		0			251.399	72.13	24	80	445	49.784	4.89404
A0A803KCJ4	LOC100494633	Uncharacterized XB5965023	Xenopus tropicalis	Uncharacterized XB5965023 OS=Xenopus tropicalis OX=8364 GN=LOC100494633 PE=4 SV=1 - [A0A803KCJ4_XENTR]	13.09	2	2	20	81	4.14191	1.27	2	2	239.54	13.09	20	79	1818	202.384	9.15869
A0A803J270	LOC100494633	Uncharacterized XB5965023	Xenopus tropicalis	Uncharacterized XB5965023 OS=Xenopus tropicalis OX=8364 GN=LOC100494633 PE=4 SV=1 - [A0A803J270_XENTR]	11.82	4	1	21	77	2.12829	0.67	1	1	223.888	11.82	21	76	1802	200.758	9.05615
Q7ZY50	tubb4b.S	Tubulin beta chain	Xenopus laevis	Tubulin beta chain OS=Xenopus laevis OX=8355 GN=tubb4b.S PE=2 SV=1 - [Q7ZY50_XENLA]	70.11	13	1	23	74		0			225.978	70.11	23	74	445	49.7769	4.85596
F7D9C1	krt7	Keratin 7	Xenopus tropicalis	Keratin 7 OS=Xenopus tropicalis OX=8364 GN=krt7 PE=3 SV=3 - [F7D9C1_XENTR]	14.79	23	1	10	77	7.51159	4.73	2	3	160.699	12.43	9	74	507	54.7345	5.8335
A1L3K7	LOC100037034	2-phospho-D-glycerate hydro-lyase	Xenopus laevis	2-phospho-D-glycerate hydro-lyase OS=Xenopus laevis OX=8355 GN=LOC100037034 PE=2 SV=1 - [A1L3K7_XENLA]	37.33	1	2	13	71		0			243.943	37.33	13	71	434	47.1112	6.80029
A0A1L8EXC8	actb.L	Uncharacterized protein	Xenopus laevis	Uncharacterized protein OS=Xenopus laevis OX=8355 GN=actb.L PE=3 SV=1 - [A0A1L8EXC8_XENLA]	54.13	10	7	17	67	2.00929	2.93	1	1	184.868	54.13	17	66	375	41.7397	5.47803
A0A1L8HAC1	XELAEV_18016081mg	IF rod domain-containing protein	Xenopus laevis	IF rod domain-containing protein OS=Xenopus laevis OX=8355 GN=XELAEV_18016081mg PE=3 SV=1 - [A0A1L8HAC1_XENLA]	8.88	13	1	5	68	4.17237	2.32	1	2	132.139	8.88	5	66	518	56.9733	8.04541
Q6GPT0	MGC82636	Adipocyte-type fatty acid-binding protein	Xenopus laevis	Adipocyte-type fatty acid-binding protein OS=Xenopus laevis OX=8355 GN=MGC82636 PE=2 SV=1 - [Q6GPT0_XENLA]	58.52	2	8	8	63	2.81988	9.63	1	1	172.646	58.52	8	62	135	15.2818	6.18896
Q8AV69	ror2.L	Receptor tyrosine kinase Xror2	Xenopus laevis	Receptor tyrosine kinase Xror2 OS=Xenopus laevis OX=8355 GN=ror2.L PE=2 SV=1 - [Q8AV69_XENLA]	35.38	6	22	22	60		0			169.676	35.38	22	60	930	104.014	6.22705
Q5U4V6	LOC397931	Tubulin alpha chain	Xenopus laevis	Tubulin alpha chain OS=Xenopus laevis OX=8355 GN=LOC397931 PE=2 SV=1 - [Q5U4V6_XENLA]	53.33	2	2	17	61	1.60481	4.67	1	1	157.087	53.33	17	60	450	50.0354	5.14795
A0A1L8FXS6	tubb2b.L	Tubulin beta chain	Xenopus laevis	Tubulin beta chain OS=Xenopus laevis OX=8355 GN=tubb2b.L PE=3 SV=1 - [A0A1L8FXS6_XENLA]	56.85	9	0	19	58		0			168.37	56.85	19	58	445	49.9069	4.89404
F7DFH2	krt59	Keratin 59	Xenopus tropicalis	Keratin 59 OS=Xenopus tropicalis OX=8364 GN=krt59 PE=3 SV=4 - [F7DFH2_XENTR]	10.64	12	2	6	59	4.17237	2.32	1	2	119.981	10.64	6	57	517	56.8814	8.06006
A0A1L8HJY0	rps3.L	DNA-(apurinic or apyrimidinic site) lyase	Xenopus laevis	DNA-(apurinic or apyrimidinic site) lyase OS=Xenopus laevis OX=8355 GN=rps3.L PE=3 SV=1 - [A0A1L8HJY0_XENLA]	74.8	5	1	19	57	2.16529	4.88	1	1	179.153	74.8	19	56	246	26.9846	9.65674
A0A1L8HBN8	XELAEV_18016554mg	Uncharacterized protein	Xenopus laevis	Uncharacterized protein OS=Xenopus laevis OX=8355 GN=XELAEV_18016554mg PE=1 SV=1 - [A0A1L8HBN8_XENLA]	42.54	17	4	19	62	15.5618	1.94	1	6	145.473	41.94	18	56	670	75.8792	6.06201
Q6NRV3	tubal3.1.S	Tubulin alpha chain	Xenopus laevis	Tubulin alpha chain OS=Xenopus laevis OX=8355 GN=tubal3.1.S PE=1 SV=1 - [Q6NRV3_XENLA]	53.33	1	2	17	56	1.60481	4.67	1	1	145.088	53.33	17	55	450	50.1675	5.14795
Q7ZYT3	rpls3-b	DNA-(apurinic or apyrimidinic site) lyase	Xenopus laevis	DNA-(apurinic or apyrimidinic site) lyase OS=Xenopus laevis OX=8355 GN=rpls3-b PE=2 SV=1 - [Q7ZYT3_XENLA]	74.8	5	1	19	55	2.16529	4.88	1	1	172.255	74.8	19	54	246	26.9986	9.65674
Q5FWK8	alox12b.S	MGC85124 protein	Xenopus laevis	MGC85124 protein OS=Xenopus laevis OX=8355 GN=alox12b.S PE=2 SV=1 - [Q5FWK8_XENLA]	36.42	16	2	17	54	2.82467	1.94	1	1	138.902	36.42	17	53	670	75.8321	5.87158
A0A6I8Q420	eno1	2-phospho-D-glycerate hydro-lyase	Xenopus tropicalis	2-phospho-D-glycerate hydro-lyase OS=Xenopus tropicalis OX=8364 GN=eno1 PE=3 SV=1 - [A0A6I8Q420_XENTR]	34.53	7	1	12	53		0			185.382	34.53	12	53	391	42.791	7.00537
Q6P367	tubb2b	Tubulin beta chain	Xenopus tropicalis	Tubulin beta chain OS=Xenopus tropicalis OX=8364 GN=tubb2b PE=2 SV=1 - [Q6P367_XENTR]	64.04	12	0	20	52		0			151.453	64.04	20	52	445	49.889	4.89404
Q5BL39	tubb4a	Tubulin beta chain	Xenopus tropicalis	Tubulin beta chain OS=Xenopus tropicalis OX=8364 GN=tubb4a PE=2 SV=1 - [Q5BL39_XENTR]	51.58	12	3	17	48		0			135.973	51.58	17	48	444	49.7059	4.91943
Q5EAW6	Xdsh	Xdsh protein	Xenopus laevis	Xdsh protein OS=Xenopus laevis OX=8355 GN=Xdsh PE=2 SV=1 - [Q5EAW6_XENLA]	40.56	8	5	19	47		0			158.339	40.56	19	47	673	73.1521	5.94775
Q8AVP8	ppia.S	Peptidyl-prolyl cis-trans isomerase	Xenopus laevis	Peptidyl-prolyl cis-trans isomerase OS=Xenopus laevis OX=8355 GN=ppia.S PE=1 SV=1 - [Q8AVP8_XENLA]	57.32	3	5	6	44		0			148.177	57.32	6	44	164	17.9008	8.35303
B7ZSI2	lk-a	Lk-a protein	Xenopus laevis	Lk-a protein OS=Xenopus laevis OX=8355 GN=lk-a PE=2 SV=1 - [B7ZSI2_XENLA]	11.23	9	1	10	48	9.90957	6.04	3	4	100.171	9.15	9	44	579	59.876	5.59229
A0A6I8Q7P8	krt61	Keratin 61	Xenopus tropicalis	Keratin 61 OS=Xenopus tropicalis OX=8364 GN=krt61 PE=3 SV=2 - [A0A6I8Q7P8_XENTR]	12.57	8	1	10	48	9.90957	6.38	3	4	100.411	10.38	9	44	549	57.3349	5.70654
Q6P8G7	tuba1c	Tubulin alpha chain	Xenopus tropicalis	Tubulin alpha chain OS=Xenopus tropicalis OX=8364 GN=tuba1c PE=2 SV=1 - [Q6P8G7_XENTR]	50.33	9	0	16	44	1.60481	4.68	1	1	104.19	50.33	16	43	449	49.8475	5.09717
Q8AVE2	hspa1l.S	Hsc70 protein	Xenopus laevis	Hsc70 protein OS=Xenopus laevis OX=8355 GN=hspa1l.S PE=2 SV=1 - [Q8AVE2_XENLA]	38.46	22	1	20	42		0			114.8	38.46	20	42	650	71.1444	5.59229
Q7ZTK6	hspa8.L	MGC53952 protein	Xenopus laevis	MGC53952 protein OS=Xenopus laevis OX=8355 GN=hspa8.L PE=2 SV=1 - [Q7ZTK6_XENLA]	41.49	24	1	21	42		0			113.077	41.49	21	42	646	70.7481	5.40186
A0A1L8H4V1	XELAEV_18019661mg	Uncharacterized protein	Xenopus laevis	Uncharacterized protein OS=Xenopus laevis OX=8355 GN=XELAEV_18019661mg PE=1 SV=1 - [A0A1L8H4V1_XENLA]	29.94	11	3	17	42		0			122.204	29.94	17	42	678	73.6249	6.34131
A0A6I8RMY1	actc1	Actin, alpha cardiac muscle 1	Xenopus tropicalis	Actin, alpha cardiac muscle 1 OS=Xenopus tropicalis OX=8364 GN=actc1 PE=3 SV=1 - [A0A6I8RMY1_XENTR]	27.54	11	1	11	43	2.00929	2.94	1	1	101.702	27.54	11	42	374	41.6328	5.70654
A0A6I8SRE6	krt61	Keratin 61	Xenopus tropicalis	Keratin 61 OS=Xenopus tropicalis OX=8364 GN=krt61 PE=3 SV=2 - [A0A6I8SRE6_XENTR]	12.82	11	3	11	44	7.51159	4.16	2	3	94.3035	10.75	10	41	577	60.2351	7.76709
A1L3K5	LOC100037033	LOC100037033 protein	Xenopus laevis	LOC100037033 protein OS=Xenopus laevis OX=8355 GN=LOC100037033 PE=2 SV=1 - [A1L3K5_XENLA]	37.15	10	1	19	40		0			109.781	37.15	19	40	646	70.8272	5.51611
A0A1L8HHR4	tuba1c.L	Tubulin alpha chain	Xenopus laevis	Tubulin alpha chain OS=Xenopus laevis OX=8355 GN=tuba1c.L PE=3 SV=1 - [A0A1L8HHR4_XENLA]	47.22	10	0	15	40	1.60481	4.68	1	1	90.8591	47.22	15	39	449	49.8475	5.09717
A0A1L8GZI9	XELAEV_18017873mg	Tubulin alpha chain	Xenopus laevis	Tubulin alpha chain OS=Xenopus laevis OX=8355 GN=XELAEV_18017873mg PE=1 SV=1 - [A0A1L8GZI9_XENLA]	42.86	1	1	13	40	1.60481	4.84	1	1	101.359	42.86	13	39	434	48.4246	5.04639
A0A1L8GL32	gpi.L	Glucose-6-phosphate isomerase	Xenopus laevis	Glucose-6-phosphate isomerase OS=Xenopus laevis OX=8355 GN=gpi.L PE=1 SV=1 - [A0A1L8GL32_XENLA]	47.2	5	13	20	39	2.67183	3.07	1	1	93.6532	47.2	20	38	553	61.9185	7.34229
Q7SYX2	serpinb6.L	MGC64421 protein	Xenopus laevis	MGC64421 protein OS=Xenopus laevis OX=8355 GN=serpinb6.L PE=1 SV=1 - [Q7SYX2_XENLA]	56.2	4	10	13	40	5.19542	6.07	1	2	108.282	56.2	13	38	379	42.7863	5.84619
Q9I8J7	tktl2.L	MGC69114 protein	Xenopus laevis	MGC69114 protein OS=Xenopus laevis OX=8355 GN=tktl2.L PE=1 SV=1 - [Q9I8J7_XENLA]	39.52	5	18	20	37		0			100.571	39.52	20	37	625	67.4088	6.72705
Q6NRQ9	MGC82327	Glutathione-dependent dehydroascorbate reductase	Xenopus laevis	Glutathione-dependent dehydroascorbate reductase OS=Xenopus laevis OX=8355 GN=MGC82327 PE=2 SV=1 - [Q6NRQ9_XENLA]	47.3	10	12	12	35		0			106.837	47.3	12	35	241	27.5511	6.3667
A0A803K9J1	tubal3.1	Tubulin alpha-like 3, gene 1	Xenopus tropicalis	Tubulin alpha-like 3, gene 1 OS=Xenopus tropicalis OX=8364 GN=tubal3.1 PE=4 SV=1 - [A0A803K9J1_XENTR]	41.69	3	0	14	36	1.60481	4.66	1	1	84.8218	41.69	14	35	451	50.0896	5.05908
B7ZTG2	tuba4b	Tubulin alpha chain	Xenopus tropicalis	Tubulin alpha chain OS=Xenopus tropicalis OX=8364 GN=tuba4b PE=2 SV=1 - [B7ZTG2_XENTR]	35.41	4	1	13	34	1.60481	4.68	1	1	71.6232	35.41	13	33	449	49.9724	5.05908
A0A1L8G769	mdh1.L	Malate dehydrogenase	Xenopus laevis	Malate dehydrogenase OS=Xenopus laevis OX=8355 GN=mdh1.L PE=3 SV=1 - [A0A1L8G769_XENLA]	60.78	1	5	14	33		0			98.763	60.78	14	33	334	36.3559	6.58057
Q7SZB1	pfn1.S	Profilin	Xenopus laevis	Profilin OS=Xenopus laevis OX=8355 GN=pfn1.S PE=2 SV=1 - [Q7SZB1_XENLA]	72.26	2	7	8	32					79.7482	72.26	8	32	137	14.8692	7.53271
Q7ZWR6	atp5f1b.S	ATP synthase subunit beta	Xenopus laevis	ATP synthase subunit beta OS=Xenopus laevis OX=8355 GN=atp5f1b.S PE=1 SV=1 - [Q7ZWR6_XENLA]	41.52	4	2	15	30		0			80.4176	41.52	15	30	525	56.3385	5.40186
Q68EY5	atp5f1a.L	ATP synthase subunit alpha	Xenopus laevis	ATP synthase subunit alpha OS=Xenopus laevis OX=8355 GN=atp5f1a.L PE=2 SV=1 - [Q68EY5_XENLA]	32.91	2	2	14	29		0			81.3894	32.91	14	29	553	59.8508	9.1001
Q7ZY52	XELAEV_18036725mg	Glyceraldehyde-3-phosphate dehydrogenase	Xenopus laevis	Glyceraldehyde-3-phosphate dehydrogenase OS=Xenopus laevis OX=8355 GN=XELAEV_18036725mg PE=1 SV=1 - [Q7ZY52_XENLA]	47.15	4	8	11	30	2.41784	4.2	1	1	91.3558	47.15	11	29	333	35.8122	8.04541
A0A1L8HS35	XELAEV_18011128mg	ATP synthase subunit alpha	Xenopus laevis	ATP synthase subunit alpha OS=Xenopus laevis OX=8355 GN=XELAEV_18011128mg PE=1 SV=1 - [A0A1L8HS35_XENLA]	32.91	9	2	14	29		0			79.2615	32.91	14	29	553	59.9368	9.1001
A0A1L8G0L3	mdh1.S	Malate dehydrogenase	Xenopus laevis	Malate dehydrogenase OS=Xenopus laevis OX=8355 GN=mdh1.S PE=1 SV=1 - [A0A1L8G0L3_XENLA]	60.78	4	5	14	28		0			80.5566	60.78	14	28	334	36.4019	6.91748
A0A1L8HMU9	XELAEV_18009640mg	Tr-type G domain-containing protein	Xenopus laevis	Tr-type G domain-containing protein OS=Xenopus laevis OX=8355 GN=XELAEV_18009640mg PE=1 SV=1 - [A0A1L8HMU9_XENLA]	28.13	8	5	18	29	1.68633	1.89	1	1	57.9059	28.13	18	28	846	94.0582	6.82959
A0A1L8HHY6	atp5f1b.L	ATP synthase subunit beta	Xenopus laevis	ATP synthase subunit beta OS=Xenopus laevis OX=8355 GN=atp5f1b.L PE=3 SV=1 - [A0A1L8HHY6_XENLA]	38.48	1	1	14	28		0			74.484	38.48	14	28	525	56.3985	5.35107
A0A1L8HEI6	tuba5.L	Tubulin alpha chain	Xenopus laevis	Tubulin alpha chain OS=Xenopus laevis OX=8355 GN=tuba5.L PE=3 SV=1 - [A0A1L8HEI6_XENLA]	35.63	1	1	12	29	1.60481	4.68	1	1	68.6935	35.63	12	28	449	49.9475	5.14795
A0A1L8H000	pkm.L	Pyruvate kinase	Xenopus laevis	Pyruvate kinase OS=Xenopus laevis OX=8355 GN=pkm.L PE=1 SV=1 - [A0A1L8H000_XENLA]	37.76	9	11	15	28		0			72.7293	37.76	15	28	527	57.2895	7.31299
A0A1L8GCZ4	XELAEV_18024169mg	Pyruvate carboxylase	Xenopus laevis	Pyruvate carboxylase OS=Xenopus laevis OX=8355 GN=XELAEV_18024169mg PE=1 SV=1 - [A0A1L8GCZ4_XENLA]	21.41	1	6	19	27		0			56.299	21.41	19	27	1177	130.396	6.78564
A2BDA9	LOC100037087	LOC100037087 protein	Xenopus laevis	LOC100037087 protein OS=Xenopus laevis OX=8355 GN=LOC100037087 PE=2 SV=1 - [A2BDA9_XENLA]	6.73	1	1	6	37	24.534	2.45	1	12	56.9613	5.71	5	25	490	54.5315	5.8208
Q7ZXP8	eef2.1.L	Eef2-prov protein	Xenopus laevis	Eef2-prov protein OS=Xenopus laevis OX=8355 GN=eef2.1.L PE=1 SV=1 - [Q7ZXP8_XENLA]	21.68	4	2	15	26	1.68633	1.86	1	1	51.2073	21.68	15	25	858	95.3659	6.93213
Q6GP33	gpi.S	Glucose-6-phosphate isomerase	Xenopus laevis	Glucose-6-phosphate isomerase OS=Xenopus laevis OX=8355 GN=gpi.S PE=2 SV=1 - [Q6GP33_XENLA]	35.8	1	7	14	24		0			58.6059	35.8	14	24	553	62.0667	7.47412
A0A1L8I1W4	rpl6.L	60S ribosomal protein L6	Xenopus laevis	60S ribosomal protein L6 OS=Xenopus laevis OX=8355 GN=rpl6.L PE=1 SV=1 - [A0A1L8I1W4_XENLA]	33.72	2	3	9	24		0			41.8539	33.72	9	24	258	29.6408	10.9604
Q7SY96	rpl4.S	Rpl4-b protein	Xenopus laevis	Rpl4-b protein OS=Xenopus laevis OX=8355 GN=rpl4.S PE=1 SV=1 - [Q7SY96_XENLA]	30.17	8	11	11	23		0			56.1942	30.17	11	23	401	45.3968	10.9897
Q7ZXA2	eef1a1o.S	Elongation factor 1-alpha	Xenopus laevis	Elongation factor 1-alpha OS=Xenopus laevis OX=8355 GN=eef1a1o.S PE=2 SV=1 - [Q7ZXA2_XENLA]	27.11	6	1	11	23		0			75.512	27.11	11	23	461	50.1923	9.15869
A0A1L8HFS9	eef1a1o.L	Elongation factor 1-alpha	Xenopus laevis	Elongation factor 1-alpha OS=Xenopus laevis OX=8355 GN=eef1a1o.L PE=3 SV=1 - [A0A1L8HFS9_XENLA]	24.51	5	1	10	22		0			72.8036	24.51	10	22	461	50.0913	9.17334
A0A1L8GQX2	ldhb.S	L-lactate dehydrogenase	Xenopus laevis	L-lactate dehydrogenase OS=Xenopus laevis OX=8355 GN=ldhb.S PE=1 SV=1 - [A0A1L8GQX2_XENLA]	27.84	6	4	9	22		0			59.827	27.84	9	22	334	36.3942	6.93213
A0A1L8GGZ9	XELAEV_18025652mg	Uncharacterized protein	Xenopus laevis	Uncharacterized protein OS=Xenopus laevis OX=8355 GN=XELAEV_18025652mg PE=3 SV=1 - [A0A1L8GGZ9_XENLA]	28.54	13	10	10	22		0			45.6445	28.54	10	22	403	46.0538	10.1987
A0A1L8FX33	XELAEV_18031324mg	Succinate dehydrogenase [ubiquinone] flavoprotein subunit, mitochondrial	Xenopus laevis	Succinate dehydrogenase [ubiquinone] flavoprotein subunit, mitochondrial OS=Xenopus laevis OX=8355 GN=XELAEV_18031324mg PE=1 SV=1 - [A0A1L8FX33_XENLA]	31.44	8	6	13	23	3.19206	2.91	1	1	50.6703	28.53	12	22	722	79.1834	7.66455
Q6PI76	rps14.S	Rps14-prov protein	Xenopus laevis	Rps14-prov protein OS=Xenopus laevis OX=8355 GN=rps14.S PE=1 SV=1 - [Q6PI76_XENLA]	41.72	4	9	9	21		0			65.6701	41.72	9	21	151	16.2625	10.0522
A0A1L8HLR2	rps3a.S	40S ribosomal protein S3a	Xenopus laevis	40S ribosomal protein S3a OS=Xenopus laevis OX=8355 GN=rps3a.S PE=1 SV=1 - [A0A1L8HLR2_XENLA]	35.23	3	10	10	21		0			51.9618	35.23	10	21	264	29.9218	9.71533
Q6GQB3	prdx1.S	MGC80194 protein	Xenopus laevis	MGC80194 protein OS=Xenopus laevis OX=8355 GN=prdx1.S PE=2 SV=1 - [Q6GQB3_XENLA]	44.22	5	2	6	21		0			60.7459	44.22	6	21	199	22.3433	6.34131
Q6DJF7	rpl6.S	60S ribosomal protein L6	Xenopus laevis	60S ribosomal protein L6 OS=Xenopus laevis OX=8355 GN=rpl6.S PE=2 SV=1 - [Q6DJF7_XENLA]	36.05	2	2	9	21		0			31.6815	36.05	9	21	258	29.6518	10.8433
Q6PCI8	pc.1.L	Pyruvate carboxylase	Xenopus laevis	Pyruvate carboxylase OS=Xenopus laevis OX=8355 GN=pc.1.L PE=1 SV=1 - [Q6PCI8_XENLA]	17.59	1	2	15	21		0			46.7997	17.59	15	21	1177	130.011	6.93213
A0A1L8FM89	XELAEV_18035683mg	Protein Wnt	Xenopus laevis	Protein Wnt OS=Xenopus laevis OX=8355 GN=XELAEV_18035683mg PE=3 SV=1 - [A0A1L8FM89_XENLA]	29.34	11	10	10	21		0			58.7456	29.34	10	21	351	39.157	8.20654
Q9I9M9	slc25a5.L	ADP/ATP translocase	Xenopus laevis	ADP/ATP translocase OS=Xenopus laevis OX=8355 GN=slc25a5.L PE=1 SV=1 - [Q9I9M9_XENLA]	24.16	3	1	8	20		0			40.9687	24.16	8	20	298	32.9191	9.70068
A0A1L8EX90	hspd1.L	60 kDa chaperonin	Xenopus laevis	60 kDa chaperonin OS=Xenopus laevis OX=8355 GN=hspd1.L PE=1 SV=1 - [A0A1L8EX90_XENLA]	33.51	10	13	13	21	1.99134	2.08	1	1	47.0755	33.51	13	20	576	61.5427	6.30322
Q6PBF5	slc25a5	ADP/ATP translocase	Xenopus tropicalis	ADP/ATP translocase OS=Xenopus tropicalis OX=8364 GN=slc25a5 PE=2 SV=1 - [Q6PBF5_XENTR]	25.17	3	1	8	20		0			39.2652	25.17	8	20	298	33.1072	9.74463
Q28IA0	csrp2	Cysteine and glycine-rich protein 2	Xenopus tropicalis	Cysteine and glycine-rich protein 2 OS=Xenopus tropicalis OX=8364 GN=csrp2 PE=2 SV=1 - [Q28IA0_XENTR]	45.83	3	5	8	20		0			57.6502	45.83	8	20	192	20.8507	8.52881
A0A1L8F2B5	rps4x.S	40S ribosomal protein S4	Xenopus laevis	40S ribosomal protein S4 OS=Xenopus laevis OX=8355 GN=rps4x.S PE=1 SV=1 - [A0A1L8F2B5_XENLA]	47.15	2	11	11	20	0	3.8	1	1	39.1287	47.15	11	19	263	29.646	10.1548
Q7ZWJ2	uqcrc1.L	Uqcrc1 protein	Xenopus laevis	Uqcrc1 protein OS=Xenopus laevis OX=8355 GN=uqcrc1.L PE=2 SV=1 - [Q7ZWJ2_XENLA]	29.71	6	10	10	19		0			52.2757	29.71	10	19	478	52.3124	6.21436
A0A1L8HBT8	XELAEV_18011255mg	Cystatin domain-containing protein	Xenopus laevis	Cystatin domain-containing protein OS=Xenopus laevis OX=8355 GN=XELAEV_18011255mg PE=3 SV=1 - [A0A1L8HBT8_XENLA]	43.56	2	4	4	20	2.5499	13.86	1	1	57.4263	43.56	4	19	101	11.2296	7.32764
A0A1L8EXB4	XELAEV_18045092mg	GLOBIN domain-containing protein	Xenopus laevis	GLOBIN domain-containing protein OS=Xenopus laevis OX=8355 GN=XELAEV_18045092mg PE=3 SV=1 - [A0A1L8EXB4_XENLA]	69.72	12	9	9	19		0			40.2734	69.72	9	19	142	15.6541	5.78271
B0BMH1	krt12.5	Krt12 protein	Xenopus tropicalis	Krt12 protein OS=Xenopus tropicalis OX=8364 GN=krt12.5 PE=2 SV=1 - [B0BMH1_XENTR]	6.67	23	5	5	19		0			51.0563	6.67	5	19	450	48.9557	5.10986
Q7SYQ4	prdx6.S	MGC64582 protein	Xenopus laevis	MGC64582 protein OS=Xenopus laevis OX=8355 GN=prdx6.S PE=1 SV=1 - [Q7SYQ4_XENLA]	49.55	6	8	8	19					46.6558	49.55	8	19	224	25.0537	5.66846
G3GBS3	PRDX2	Peroxiredoxin 2	Xenopus laevis	Peroxiredoxin 2 OS=Xenopus laevis OX=8355 GN=PRDX2 PE=1 SV=1 - [G3GBS3_XENLA]	38.61	5	7	8	20	4.73883	7.92	1	2	50.6278	38.61	8	18	202	22.4126	7.00537
G1K3L3	tubb6	Tubulin beta chain	Xenopus tropicalis	Tubulin beta chain OS=Xenopus tropicalis OX=8364 GN=tubb6 PE=2 SV=2 - [G1K3L3_XENTR]	20.18	10	1	6	18		0			55.3733	20.18	6	18	446	50.003	4.85596
A0A1L8F9K5	XELAEV_18039573mg	SERPIN domain-containing protein	Xenopus laevis	SERPIN domain-containing protein OS=Xenopus laevis OX=8355 GN=XELAEV_18039573mg PE=3 SV=1 - [A0A1L8F9K5_XENLA]	27.06	2	9	9	18	2.00898	3.21	1	1	46.7087	23.85	8	17	436	49.4914	8.06006
A0A1L8EKH3	XELAEV_18045881mg	IF rod domain-containing protein	Xenopus laevis	IF rod domain-containing protein OS=Xenopus laevis OX=8355 GN=XELAEV_18045881mg PE=1 SV=1 - [A0A1L8EKH3_XENLA]	6.22	2	3	4	17		0			31.5081	6.22	4	17	434	47.5085	5.32568
A0A1L8GCW3	cfl1.S	ADF-H domain-containing protein	Xenopus laevis	ADF-H domain-containing protein OS=Xenopus laevis OX=8355 GN=cfl1.S PE=1 SV=1 - [A0A1L8GCW3_XENLA]	58.33	3	4	8	16		0			48.1717	58.33	8	16	168	19.1077	7.75244
Q5XGT4	krt61L	LOC495267 protein	Xenopus laevis	LOC495267 protein OS=Xenopus laevis OX=8355 GN=krt61L PE=2 SV=1 - [Q5XGT4_XENLA]	7.46	2	1	6	19	6.87679	3.56	2	3	28.6953	7.46	6	16	590	63.1243	8.11865
Q6DE33	uqcrc2.L	Uqcrc2 protein	Xenopus laevis	Uqcrc2 protein OS=Xenopus laevis OX=8355 GN=uqcrc2.L PE=2 SV=1 - [Q6DE33_XENLA]	29.49	4	3	10	16		0			42.3778	29.49	10	16	451	47.8316	8.90967
A0A1L8I3J8	rpl17.L	60S ribosomal protein L17	Xenopus laevis	60S ribosomal protein L17 OS=Xenopus laevis OX=8355 GN=rpl17.L PE=3 SV=1 - [A0A1L8I3J8_XENLA]	36.41	5	6	6	16		0			38.387	36.41	6	16	184	21.3964	10.1841
Q3KQC9	rps16	Rps16 protein	Xenopus laevis	Rps16 protein OS=Xenopus laevis OX=8355 GN=rps16 PE=2 SV=1 - [Q3KQC9_XENLA]	39.04	4	5	5	16		0			48.276	39.04	5	16	146	16.32	10.1401
A0A1L8GWQ3	ldhb.L	L-lactate dehydrogenase	Xenopus laevis	L-lactate dehydrogenase OS=Xenopus laevis OX=8355 GN=ldhb.L PE=3 SV=1 - [A0A1L8GWQ3_XENLA]	19.16	1	1	6	16		0			42.8781	19.16	6	16	334	36.4952	6.91748
A0A1L8GJZ1	XELAEV_18022280mg	ADF-H domain-containing protein	Xenopus laevis	ADF-H domain-containing protein OS=Xenopus laevis OX=8355 GN=XELAEV_18022280mg PE=1 SV=1 - [A0A1L8GJZ1_XENLA]	30.82	1	3	7	16		0			44.2011	30.82	7	16	292	32.919	9.12939
Q6EE53	40S ribosomal protein S8 (Fragment) OS=Xenopus laevis OX=8355	40S ribosomal protein S8 (Fragment)	Xenopus laevis	40S ribosomal protein S8 (Fragment) OS=Xenopus laevis OX=8355 PE=2 SV=1 - [Q6EE53_XENLA]	39.68	7	7	7	17	0	7.94	1	1	36.3078	39.68	7	16	189	21.7738	10.228
F7AZ24	krt17	Keratin 17	Xenopus tropicalis	Keratin 17 OS=Xenopus tropicalis OX=8364 GN=krt17 PE=3 SV=4 - [F7AZ24_XENTR]	6.87	1	3	6	16		0			52.7173	6.87	6	16	451	49.6499	5.43994
A0A1B8XTN6	XENTR_v90028266mg	60S ribosomal protein L13a	Xenopus tropicalis	60S ribosomal protein L13a OS=Xenopus tropicalis OX=8364 GN=XENTR_v90028266mg PE=3 SV=1 - [A0A1B8XTN6_XENTR]	27.03	7	8	8	16		0			35.4974	27.03	8	16	222	25.4625	11.1216
A0A1L8FIG2	tpi1.L	Triosephosphate isomerase	Xenopus laevis	Triosephosphate isomerase OS=Xenopus laevis OX=8355 GN=tpi1.L PE=1 SV=1 - [A0A1L8FIG2_XENLA]	42.34	1	4	7	16					40.4881	42.34	7	16	248	26.8629	7.00537
A0A1L8FZP0	XELAEV_18032253mg	14_3_3 domain-containing protein	Xenopus laevis	14_3_3 domain-containing protein OS=Xenopus laevis OX=8355 GN=XELAEV_18032253mg PE=1 SV=1 - [A0A1L8FZP0_XENLA]	39.59	13	6	8	15		0			30.8288	39.59	8	15	245	27.7117	4.79248
A0A1L8FZ13	rps20.L	40S ribosomal protein S20	Xenopus laevis	40S ribosomal protein S20 OS=Xenopus laevis OX=8355 GN=rps20.L PE=3 SV=1 - [A0A1L8FZ13_XENLA]	23.53	5	2	4	15		0			44.3944	23.53	4	15	119	13.3473	9.93506
Q6DCT5	aldh2.L	MGC80785 protein	Xenopus laevis	MGC80785 protein OS=Xenopus laevis OX=8355 GN=aldh2.L PE=1 SV=1 - [Q6DCT5_XENLA]	29.17	16	11	11	15		0			32.3684	29.17	11	15	521	57.2133	7.6499
Q641I6	plin2.S	Perilipin	Xenopus laevis	Perilipin OS=Xenopus laevis OX=8355 GN=plin2.S PE=2 SV=1 - [Q641I6_XENLA]	35.15	1	6	10	16	0	3.22	1	1	38.3649	35.15	10	15	404	44.3844	5.75732
A0A1L8HJI5	XELAEV_18013932mg	Ribonucleoside-diphosphate reductase	Xenopus laevis	Ribonucleoside-diphosphate reductase OS=Xenopus laevis OX=8355 GN=XELAEV_18013932mg PE=1 SV=1 - [A0A1L8HJI5_XENLA]	22.89	9	1	10	15		0			34.5406	22.89	10	15	734	83.4658	6.40479
Q7SZ23	gstm1.S	Glutathione transferase	Xenopus laevis	Glutathione transferase OS=Xenopus laevis OX=8355 GN=gstm1.S PE=1 SV=1 - [Q7SZ23_XENLA]	46.12	6	8	8	16	1.81408	5.48	1	1	36.4503	46.12	8	15	219	25.375	7.82568
A0A1L8FXW1	XELAEV_180316181mg	Uncharacterized protein (Fragment)	Xenopus laevis	Uncharacterized protein (Fragment) OS=Xenopus laevis OX=8355 GN=XELAEV_180316181mg PE=1 SV=1 - [A0A1L8FXW1_XENLA]	2.96	4	6	6	15		0			32.0702	2.96	6	15	2802	323.337	6.90283
A0A1L8FRX7	XELAEV_18033323mg	Succinate dehydrogenase [ubiquinone] flavoprotein subunit, mitochondrial	Xenopus laevis	Succinate dehydrogenase [ubiquinone] flavoprotein subunit, mitochondrial OS=Xenopus laevis OX=8355 GN=XELAEV_18033323mg PE=3 SV=1 - [A0A1L8FRX7_XENLA]	22.71	1	1	8	15		0			32.7301	22.71	8	15	665	72.724	6.96143
A0A1L8F8E2	rps5.L	Ribosomal_S7 domain-containing protein	Xenopus laevis	Ribosomal_S7 domain-containing protein OS=Xenopus laevis OX=8355 GN=rps5.L PE=1 SV=1 - [A0A1L8F8E2_XENLA]	27.09	4	5	5	15		0			37.8353	27.09	5	15	203	22.729	9.74463
A0A1L8ESY3	XELAEV_18043490mg	SH3 domain-containing protein	Xenopus laevis	SH3 domain-containing protein OS=Xenopus laevis OX=8355 GN=XELAEV_18043490mg PE=3 SV=1 - [A0A1L8ESY3_XENLA]	17.58	9	11	11	15		0			29.0163	17.58	11	15	853	95.6969	8.35303
A0A1L8EKM0	XELAEV_18045879mg	IF rod domain-containing protein	Xenopus laevis	IF rod domain-containing protein OS=Xenopus laevis OX=8355 GN=XELAEV_18045879mg PE=1 SV=1 - [A0A1L8EKM0_XENLA]	6.55	2	1	5	15		0			46.0171	6.55	5	15	458	50.267	5.43994
A0A6I8RXT6	rpl7	Ribosomal protein L7	Xenopus tropicalis	Ribosomal protein L7 OS=Xenopus tropicalis OX=8364 GN=rpl7 PE=3 SV=2 - [A0A6I8RXT6_XENTR]	26.64	7	6	6	15		0			43.2433	26.64	6	15	244	28.6371	10.9604
F7DL49	rps18	40S ribosomal protein S18	Xenopus tropicalis	40S ribosomal protein S18 OS=Xenopus tropicalis OX=8364 GN=rps18 PE=3 SV=4 - [F7DL49_XENTR]	39.07	5	7	7	15		0			37.7078	39.07	7	15	151	17.5488	10.8726
A0A1L8GUD0	csrp2.S	Uncharacterized protein	Xenopus laevis	Uncharacterized protein OS=Xenopus laevis OX=8355 GN=csrp2.S PE=1 SV=1 - [A0A1L8GUD0_XENLA]	50	1	5	8	15					41.1985	50	8	15	192	20.7026	8.26514
A0A1L8EP22	dapl1.S	Uncharacterized protein	Xenopus laevis	Uncharacterized protein OS=Xenopus laevis OX=8355 GN=dapl1.S PE=1 SV=1 - [A0A1L8EP22_XENLA]	45.13	2	5	5	14		0			45.041	45.13	5	14	113	12.5177	9.99365
Q498I1	grhpr.2.L	LOC398508 protein	Xenopus laevis	LOC398508 protein OS=Xenopus laevis OX=8355 GN=grhpr.2.L PE=2 SV=1 - [Q498I1_XENLA]	34.83	5	7	7	14		0			36.4874	34.83	7	14	333	36.0269	6.17627
Q6GQ64	XB5909790.S	MGC80314 protein	Xenopus laevis	MGC80314 protein OS=Xenopus laevis OX=8355 GN=XB5909790.S PE=2 SV=1 - [Q6GQ64_XENLA]	60.95	2	5	6	15	2.20007	11.43	1	1	41.8677	60.95	6	14	105	11.6559	5.03369
Q8AVE3	hspa5.S	78 kDa glucose-regulated protein	Xenopus laevis	78 kDa glucose-regulated protein OS=Xenopus laevis OX=8355 GN=hspa5.S PE=1 SV=1 - [Q8AVE3_XENLA]	17.71	2	8	10	14		0			37.3659	17.71	10	14	655	72.3745	5.13525
A0A1L8HBR9	XELAEV_18016520mg	Ribonucleoside-diphosphate reductase	Xenopus laevis	Ribonucleoside-diphosphate reductase OS=Xenopus laevis OX=8355 GN=XELAEV_18016520mg PE=1 SV=1 - [A0A1L8HBR9_XENLA]	22.14	9	1	10	14		0			30.3746	22.14	10	14	777	88.3963	6.75635
Q3KQ82	pfn1.L	Profilin	Xenopus laevis	Profilin OS=Xenopus laevis OX=8355 GN=pfn1.L PE=1 SV=1 - [Q3KQ82_XENLA]	48.55	1	4	5	15	2.25203	9.42	1	1	33.4242	48.55	5	14	138	14.9222	7.53271
A0A1L8GZZ1	XELAEV_18017961mg	Peptidase M60 domain-containing protein	Xenopus laevis	Peptidase M60 domain-containing protein OS=Xenopus laevis OX=8355 GN=XELAEV_18017961mg PE=1 SV=1 - [A0A1L8GZZ1_XENLA]	14.6	7	9	9	14		0			34.9111	14.6	9	14	904	100.996	6.75635
A0A1L8FWH1	XELAEV_18031110mg	60S ribosomal protein L14	Xenopus laevis	60S ribosomal protein L14 OS=Xenopus laevis OX=8355 GN=XELAEV_18031110mg PE=3 SV=1 - [A0A1L8FWH1_XENLA]	36.96	3	5	5	14		0			35.8894	36.96	5	14	138	16.1267	10.5356
A0A146J5C5	itln1al.L	Intelectin-4 subunit peptide	Xenopus laevis	Intelectin-4 subunit peptide OS=Xenopus laevis OX=8355 GN=itln1al.L PE=2 SV=1 - [A0A146J5C5_XENLA]	23.28	8	6	6	14		0			34.3675	23.28	6	14	335	37.0597	5.90967
A0A1L8F9Q9	DNAAF2	Protein kintoun	Xenopus laevis	Protein kintoun OS=Xenopus laevis OX=8355 GN=DNAAF2 PE=3 SV=1 - [A0A1L8F9Q9_XENLA]	15.74	2	8	8	14		0			34.0787	15.74	8	14	788	88.6045	5.07178
Q6DIV0	rack1	Guanine nucleotide binding protein (G protein), beta polypeptide	Xenopus tropicalis	Guanine nucleotide binding protein (G protein), beta polypeptide OS=Xenopus tropicalis OX=8364 GN=rack1 PE=2 SV=1 - [Q6DIV0_XENTR]	45.11	14	10	10	14		0			34.5225	45.11	10	14	317	35.0745	7.69385
A0A1L8G3E8	eef1a1.L	Elongation factor 1-alpha	Xenopus laevis	Elongation factor 1-alpha OS=Xenopus laevis OX=8355 GN=eef1a1.L PE=1 SV=1 - [A0A1L8G3E8_XENLA]	25.32	11	3	9	13		0			32.2967	25.32	9	13	462	50.1822	9.01221
A0A1L8FDX2	tpi1.S	Triosephosphate isomerase	Xenopus laevis	Triosephosphate isomerase OS=Xenopus laevis OX=8355 GN=tpi1.S PE=1 SV=1 - [A0A1L8FDX2_XENLA]	29.44	1	3	5	14	2.1354	5.24	1	1	30.697	29.44	5	13	248	26.7448	7.35693
Q8AY70	gapdh.L	Glyceraldehyde-3-phosphate dehydrogenase	Xenopus laevis	Glyceraldehyde-3-phosphate dehydrogenase OS=Xenopus laevis OX=8355 GN=gapdh.L PE=2 SV=1 - [Q8AY70_XENLA]	37.24	1	6	8	13		0			38.3683	37.24	8	13	333	35.8793	8.25049
Q7ZXH6	ywhaq.S	Ywhaq-prov protein	Xenopus laevis	Ywhaq-prov protein OS=Xenopus laevis OX=8355 GN=ywhaq.S PE=2 SV=1 - [Q7ZXH6_XENLA]	32.52	11	1	7	13		0			31.8176	32.52	7	13	246	27.6567	4.81787
A0A1L8HWL5	ndufa7.L	Complex I-B14.5a	Xenopus laevis	Complex I-B14.5a OS=Xenopus laevis OX=8355 GN=ndufa7.L PE=3 SV=1 - [A0A1L8HWL5_XENLA]	49.57	5	3	5	13		0			33.9124	49.57	5	13	115	12.5875	9.87646
A0A1L8HPG3	XELAEV_18010175mg	HABP4_PAI-RBP1 domain-containing protein	Xenopus laevis	HABP4_PAI-RBP1 domain-containing protein OS=Xenopus laevis OX=8355 GN=XELAEV_18010175mg PE=1 SV=1 - [A0A1L8HPG3_XENLA]	32.28	2	6	6	13		0			39.5216	32.28	6	13	378	42.6501	6.7417
A0A1L8F028	XELAEV_18041207mg	Alpha-1,4 glucan phosphorylase	Xenopus laevis	Alpha-1,4 glucan phosphorylase OS=Xenopus laevis OX=8355 GN=XELAEV_18041207mg PE=1 SV=1 - [A0A1L8F028_XENLA]	15.67	24	10	10	13		0			26.7175	15.67	10	13	855	97.8114	7.60596
Q7SYT0	eef1a2.S	Elongation factor 1-alpha	Xenopus laevis	Elongation factor 1-alpha OS=Xenopus laevis OX=8355 GN=eef1a2.S PE=2 SV=1 - [Q7SYT0_XENLA]	21.81	8	1	9	13		0			30.4522	21.81	9	13	463	50.4304	9.01221
Q5BL42	hsp90ab1	Heat shock protein 90kDa alpha (Cytosolic), class B member 1	Xenopus tropicalis	Heat shock protein 90kDa alpha (Cytosolic), class B member 1 OS=Xenopus tropicalis OX=8364 GN=hsp90ab1 PE=2 SV=1 - [Q5BL42_XENTR]	19.36	24	7	11	14	2.11898	1.52	1	1	28.2963	19.36	11	13	723	83.1591	5.03369
Q6GNH1	rpl23.S	60S ribosomal protein L23	Xenopus laevis	60S ribosomal protein L23 OS=Xenopus laevis OX=8355 GN=rpl23.S PE=1 SV=1 - [Q6GNH1_XENLA]	46.43	4	6	6	13	1.875	14.29	1	1	28.5787	46.43	6	12	140	14.842	10.5063
Q7ZWY6	rpl9.L	60S ribosomal protein L9	Xenopus laevis	60S ribosomal protein L9 OS=Xenopus laevis OX=8355 GN=rpl9.L PE=2 SV=1 - [Q7ZWY6_XENLA]	41.15	5	1	5	14	6.52742	9.9	1	2	34.3218	41.15	5	12	192	21.8848	10.0376
Q7ZTQ8	uqcrc2.S	Uqcrc2-prov protein	Xenopus laevis	Uqcrc2-prov protein OS=Xenopus laevis OX=8355 GN=uqcrc2.S PE=2 SV=1 - [Q7ZTQ8_XENLA]	20.4	2	1	8	12		0			31.0825	20.4	8	12	451	47.9696	8.92432
Q8AVB7	cct2.S	CCT-beta	Xenopus laevis	CCT-beta OS=Xenopus laevis OX=8355 GN=cct2.S PE=1 SV=1 - [Q8AVB7_XENLA]	20.75	5	8	8	12		0			23.9896	20.75	8	12	535	57.6291	6.21436
A0A1L8HK38	XELAEV_18008676mg	Isocitrate dehydrogenase [NAD] subunit, mitochondrial	Xenopus laevis	Isocitrate dehydrogenase [NAD] subunit, mitochondrial OS=Xenopus laevis OX=8355 GN=XELAEV_18008676mg PE=1 SV=1 - [A0A1L8HK38_XENLA]	20.34	2	4	6	12		0			31.1666	20.34	6	12	413	45.8366	8.57275
A0A1L8GBH6	ywhaq.L	14_3_3 domain-containing protein	Xenopus laevis	14_3_3 domain-containing protein OS=Xenopus laevis OX=8355 GN=ywhaq.L PE=3 SV=1 - [A0A1L8GBH6_XENLA]	30.89	12	1	7	12		0			27.8922	30.89	7	12	246	27.7347	4.83057
A0A1L8EXD5	kpna7.L	Importin subunit alpha	Xenopus laevis	Importin subunit alpha OS=Xenopus laevis OX=8355 GN=kpna7.L PE=1 SV=1 - [A0A1L8EXD5_XENLA]	21.22	6	3	5	12		0			26.8002	21.22	5	12	523	57.7721	5.33838
A0A1L8END4	XELAEV_18046891mg	40S ribosomal protein S11 (Fragment)	Xenopus laevis	40S ribosomal protein S11 (Fragment) OS=Xenopus laevis OX=8355 GN=XELAEV_18046891mg PE=3 SV=1 - [A0A1L8END4_XENLA]	27.1	8	6	6	12		0			24.0438	27.1	6	12	155	18.0918	10.4771
A0A6I8QKJ5	krt78.3	Keratin 78, gene 4	Xenopus tropicalis	Keratin 78, gene 4 OS=Xenopus tropicalis OX=8364 GN=krt78.3 PE=3 SV=2 - [A0A6I8QKJ5_XENTR]	5.65	9	1	3	13	2.39797	2.14	1	1	32.3466	5.65	3	12	513	56.6707	7.69385
A0A803KIZ1	serpinb6	Serpin family B member 6	Xenopus tropicalis	Serpin family B member 6 OS=Xenopus tropicalis OX=8364 GN=serpinb6 PE=4 SV=1 - [A0A803KIZ1_XENTR]	17.94	5	1	4	16	11.0152	5.54	1	4	33.2437	12.4	3	12	379	42.6585	5.74463
A0A1L8I062	rplp0.L	60S acidic ribosomal protein P0	Xenopus laevis	60S acidic ribosomal protein P0 OS=Xenopus laevis OX=8355 GN=rplp0.L PE=3 SV=1 - [A0A1L8I062_XENLA]	20.38	5	5	5	12					32.1377	20.38	5	12	314	34.0496	5.56689
A0A1L8HN62	rps15.S	40S ribosomal protein S15	Xenopus laevis	40S ribosomal protein S15 OS=Xenopus laevis OX=8355 GN=rps15.S PE=1 SV=1 - [A0A1L8HN62_XENLA]	28.28	6	2	2	11		0			17.305	28.28	2	11	145	16.9641	10.2573
Q6IND2	prdx1.L	MGC83501 protein	Xenopus laevis	MGC83501 protein OS=Xenopus laevis OX=8355 GN=prdx1.L PE=1 SV=1 - [Q6IND2_XENLA]	37.19	3	1	5	14	10.6141	10.05	1	3	27.6075	27.14	4	11	199	22.2853	6.771
Q7ZXK4	rpl10.S	Rpl10-prov protein	Xenopus laevis	Rpl10-prov protein OS=Xenopus laevis OX=8355 GN=rpl10.S PE=2 SV=1 - [Q7ZXK4_XENLA]	42.33	6	2	7	11		0			24.1795	42.33	7	11	215	24.5248	10.1401
Q7ZX50	LOC444845	RNA helicase (Fragment)	Xenopus laevis	RNA helicase (Fragment) OS=Xenopus laevis OX=8355 GN=LOC444845 PE=2 SV=1 - [Q7ZX50_XENLA]	26.98	25	8	8	11		0			25.3153	26.98	8	11	404	45.8294	5.47803
A0A1L8F5F1	rpl10.L	Ribosomal_L16 domain-containing protein	Xenopus laevis	Ribosomal_L16 domain-containing protein OS=Xenopus laevis OX=8355 GN=rpl10.L PE=1 SV=1 - [A0A1L8F5F1_XENLA]	41.4	6	3	8	11		0			27.4459	41.4	8	11	215	24.5659	10.1987
Q6DCD3	hsp70	Hsp70 protein	Xenopus laevis	Hsp70 protein OS=Xenopus laevis OX=8355 GN=hsp70 PE=2 SV=1 - [Q6DCD3_XENLA]	11.9	5	2	6	11		0			28.2339	11.9	6	11	647	70.9483	5.45264
Q6PB22	habp4.L	MGC68500 protein	Xenopus laevis	MGC68500 protein OS=Xenopus laevis OX=8355 GN=habp4.L PE=2 SV=1 - [Q6PB22_XENLA]	27.72	7	6	6	11	0	3.47	1	1	30.0712	27.72	6	10	404	45.5006	7.56201
A0A1L8HL68	XELAEV_18008996mg	60S ribosomal protein L9	Xenopus laevis	60S ribosomal protein L9 OS=Xenopus laevis OX=8355 GN=XELAEV_18008996mg PE=1 SV=1 - [A0A1L8HL68_XENLA]	27.34	4	1	5	10		0			27.2158	27.34	5	10	289	32.8217	10.2427
A0A1L8G1Y2	XELAEV_18028947mg	CCT-alpha	Xenopus laevis	CCT-alpha OS=Xenopus laevis OX=8355 GN=XELAEV_18028947mg PE=3 SV=1 - [A0A1L8G1Y2_XENLA]	18.74	8	8	8	11	3.25052	3.6	1	1	23.2796	18.74	8	10	555	60.0604	6.31592
Q7SZB2	rpl27a.L	60S ribosomal protein L27a	Xenopus laevis	60S ribosomal protein L27a OS=Xenopus laevis OX=8355 GN=rpl27a.L PE=1 SV=1 - [Q7SZB2_XENLA]	24.32	6	3	3	10		0			32.3673	24.32	3	10	148	16.583	10.5649
Q66KV6	rpl28.S	60S ribosomal protein L28	Xenopus laevis	60S ribosomal protein L28 OS=Xenopus laevis OX=8355 GN=rpl28.S PE=1 SV=1 - [Q66KV6_XENLA]	18.25	1	1	3	10		0			24.4826	18.25	3	10	137	15.5407	11.854
Q6DJJ7	rps20.S	40S ribosomal protein S20	Xenopus laevis	40S ribosomal protein S20 OS=Xenopus laevis OX=8355 GN=rps20.S PE=2 SV=1 - [Q6DJJ7_XENLA]	20.17	2	1	3	10					25.6221	20.17	3	10	119	13.3353	9.93506
Q7SZA3	40S ribosomal protein S24 OS=Xenopus laevis OX=8355	40S ribosomal protein S24	Xenopus laevis	40S ribosomal protein S24 OS=Xenopus laevis OX=8355 PE=2 SV=1 - [Q7SZA3_XENLA]	52.05	6	3	3	10					23.4545	52.05	3	10	73	8.34741	9.84717
Q6GQB2	rpl7a.S	60S ribosomal protein L7a	Xenopus laevis	60S ribosomal protein L7a OS=Xenopus laevis OX=8355 GN=rpl7a.S PE=2 SV=1 - [Q6GQB2_XENLA]	16.17	11	4	4	9		0			19.4262	16.17	4	9	266	29.8549	10.5356
Q6PCF1	slc25a13.L	MGC69168 protein	Xenopus laevis	MGC69168 protein OS=Xenopus laevis OX=8355 GN=slc25a13.L PE=1 SV=1 - [Q6PCF1_XENLA]	10.21	1	1	5	9		0			23.6997	10.21	5	9	676	74.5988	8.6167
Q7ZYU0	rps6.L	40S ribosomal protein S6	Xenopus laevis	40S ribosomal protein S6 OS=Xenopus laevis OX=8355 GN=rps6.L PE=1 SV=1 - [Q7ZYU0_XENLA]	19.28	6	5	5	9		0			20.7018	19.28	5	9	249	28.6909	10.9019
A0A1L8G5V1	rps27a.L	40S ribosomal protein S27a	Xenopus laevis	40S ribosomal protein S27a OS=Xenopus laevis OX=8355 GN=rps27a.L PE=3 SV=1 - [A0A1L8G5V1_XENLA]	33.97	24	4	4	9		0			21.2461	33.97	4	9	156	17.9695	9.64209
A0A1L8FVA3	XELAEV_18030711mg	Pitrilysin metalloproteinase 1	Xenopus laevis	Pitrilysin metalloproteinase 1 OS=Xenopus laevis OX=8355 GN=XELAEV_18030711mg PE=1 SV=1 - [A0A1L8FVA3_XENLA]	9.64	5	8	8	9		0			15.1303	9.64	8	9	1027	116.59	6.46826
A0A1L8FN22	XELAEV_18035949mg	60S ribosomal protein L28	Xenopus laevis	60S ribosomal protein L28 OS=Xenopus laevis OX=8355 GN=XELAEV_18035949mg PE=3 SV=1 - [A0A1L8FN22_XENLA]	18.25	8	1	3	9		0			22.543	18.25	3	9	137	15.5896	11.7515
Q7SYU5	Fructose-bisphosphate aldolase OS=Xenopus laevis OX=8355	Fructose-bisphosphate aldolase	Xenopus laevis	Fructose-bisphosphate aldolase OS=Xenopus laevis OX=8355 PE=2 SV=1 - [Q7SYU5_XENLA]	27.96	12	4	5	9		0			18.9904	27.96	5	9	279	30.1986	8.06006
Q91384	XALD3	Fructose-bisphosphate aldolase	Xenopus laevis	Fructose-bisphosphate aldolase OS=Xenopus laevis OX=8355 GN=XALD3 PE=2 SV=2 - [Q91384_XENLA]	23.08	7	4	5	9		0			20.968	23.08	5	9	364	39.231	6.3667
A0A6I8RW99	tpi1	Triosephosphate isomerase	Xenopus tropicalis	Triosephosphate isomerase OS=Xenopus tropicalis OX=8364 GN=tpi1 PE=3 SV=1 - [A0A6I8RW99_XENTR]	21.29	2	1	4	10	2.62344	4.82	1	1	20.5192	16.47	3	9	249	26.7738	6.90283
A0A1L8HWM7	cirbp.L	RRM domain-containing protein	Xenopus laevis	RRM domain-containing protein OS=Xenopus laevis OX=8355 GN=cirbp.L PE=4 SV=1 - [A0A1L8HWM7_XENLA]	46.99	5	7	7	9					9.86723	46.99	7	9	166	17.8923	9.17334
A0A1L8FFL0	XELAEV_18037282mg	60S ribosomal protein L21	Xenopus laevis	60S ribosomal protein L21 OS=Xenopus laevis OX=8355 GN=XELAEV_18037282mg PE=3 SV=1 - [A0A1L8FFL0_XENLA]	32.5	4	4	4	9					27.5671	32.5	4	9	160	18.611	10.6089
A0A1L8HM82	ube2d3.S	UBC core domain-containing protein	Xenopus laevis	UBC core domain-containing protein OS=Xenopus laevis OX=8355 GN=ube2d3.S PE=1 SV=1 - [A0A1L8HM82_XENLA]	24.49	12	3	3	8		0			18.9166	24.49	3	8	147	16.7244	7.82568
A0A1L8EPY1	kpna7.S	Importin subunit alpha	Xenopus laevis	Importin subunit alpha OS=Xenopus laevis OX=8355 GN=kpna7.S PE=1 SV=1 - [A0A1L8EPY1_XENLA]	12.64	6	2	4	8		0			16.2053	12.64	4	8	522	57.652	5.41455
Q4V871	MGC114621	MGC114621 protein	Xenopus laevis	MGC114621 protein OS=Xenopus laevis OX=8355 GN=MGC114621 PE=2 SV=1 - [Q4V871_XENLA]	51.33	1	1	2	8		0			27.7336	51.33	2	8	113	11.4657	4.24658
Q569T0	hdac10.L	MGC115178 protein	Xenopus laevis	MGC115178 protein OS=Xenopus laevis OX=8355 GN=hdac10.L PE=2 SV=1 - [Q569T0_XENLA]	10.69	4	6	6	8		0			20.1368	10.69	6	8	683	76.6833	5.8335
Q640B9	LOC494706	LOC494706 protein (Fragment)	Xenopus laevis	LOC494706 protein (Fragment) OS=Xenopus laevis OX=8355 GN=LOC494706 PE=2 SV=1 - [Q640B9_XENLA]	16.8	6	3	3	8		0			19.202	16.8	3	8	244	27.0625	5.03369
Q6GPY3	prdx5.L	Peroxiredoxin-5	Xenopus laevis	Peroxiredoxin-5 OS=Xenopus laevis OX=8355 GN=prdx5.L PE=2 SV=1 - [Q6GPY3_XENLA]	39.15	7	5	5	8		0			20.0617	39.15	5	8	189	20.0534	8.36768
Q6NTQ9	ndufa10.S	NADH dehydrogenase [ubiquinone] 1 alpha subcomplex subunit 10, mitochondrial	Xenopus laevis	NADH dehydrogenase [ubiquinone] 1 alpha subcomplex subunit 10, mitochondrial OS=Xenopus laevis OX=8355 GN=ndufa10.S PE=1 SV=1 - [Q6NTQ9_XENLA]	22.51	6	1	6	8		0			16.946	22.51	6	8	351	40.0301	6.69775
A0A1L8GM75	XELAEV_18023071mg	Alcohol dehydrogenase (NADP(+))	Xenopus laevis	Alcohol dehydrogenase (NADP(+)) OS=Xenopus laevis OX=8355 GN=XELAEV_18023071mg PE=1 SV=1 - [A0A1L8GM75_XENLA]	29.36	3	7	7	8		0			20.2674	29.36	7	8	327	37.1191	7.13721
A0A1L8FR42	XELAEV_18032984mg	Uncharacterized protein	Xenopus laevis	Uncharacterized protein OS=Xenopus laevis OX=8355 GN=XELAEV_18032984mg PE=3 SV=1 - [A0A1L8FR42_XENLA]	10.73	7	1	5	8		0			21.1921	10.73	5	8	643	71.016	8.52881
A0A1L8ET92	XELAEV_18043640mg	Peptidylprolyl isomerase	Xenopus laevis	Peptidylprolyl isomerase OS=Xenopus laevis OX=8355 GN=XELAEV_18043640mg PE=4 SV=1 - [A0A1L8ET92_XENLA]	28.83	5	4	4	9	4.53957	15.32	1	1	26.1419	28.83	3	8	111	12.2162	8.68994
Q5XGR6	ndufa10.L	NADH dehydrogenase [ubiquinone] 1 alpha subcomplex subunit 10, mitochondrial	Xenopus laevis	NADH dehydrogenase [ubiquinone] 1 alpha subcomplex subunit 10, mitochondrial OS=Xenopus laevis OX=8355 GN=ndufa10.L PE=2 SV=1 - [Q5XGR6_XENLA]	21.37	6	1	6	8		0			13.8835	21.37	6	8	351	40.002	6.85889
Q9PTK6	fatvg	Perilipin	Xenopus laevis	Perilipin OS=Xenopus laevis OX=8355 GN=fatvg PE=2 SV=1 - [Q9PTK6_XENLA]	14.95	5	1	5	8		0			19.5168	14.95	5	8	408	44.6443	5.38916
A2BDA2	LOC100037080	40S ribosomal protein SA	Xenopus laevis	40S ribosomal protein SA OS=Xenopus laevis OX=8355 GN=LOC100037080 PE=2 SV=1 - [A2BDA2_XENLA]	26.78	1	1	5	7		0			16.5832	26.78	5	7	295	32.8174	4.86865
A0A1L8H6H2	rpl8.S	60S ribosomal protein L8	Xenopus laevis	60S ribosomal protein L8 OS=Xenopus laevis OX=8355 GN=rpl8.S PE=3 SV=1 - [A0A1L8H6H2_XENLA]	14.01	3	4	4	7		0			15.5112	14.01	4	7	257	27.9002	10.8872
A0A1L8HEF1	stmn1.L	Stathmin	Xenopus laevis	Stathmin OS=Xenopus laevis OX=8355 GN=stmn1.L PE=3 SV=1 - [A0A1L8HEF1_XENLA]	31.72	10	1	3	7		0			14.2929	31.72	3	7	145	16.7788	7.23975
Q6GNF4	rps17.L	40S ribosomal protein S17	Xenopus laevis	40S ribosomal protein S17 OS=Xenopus laevis OX=8355 GN=rps17.L PE=2 SV=1 - [Q6GNF4_XENLA]	40.74	8	3	3	7		0			16.3031	40.74	3	7	135	15.5144	9.84717
Q802B7	ndufs1.L	NADH-ubiquinone oxidoreductase 75 kDa subunit, mitochondrial	Xenopus laevis	NADH-ubiquinone oxidoreductase 75 kDa subunit, mitochondrial OS=Xenopus laevis OX=8355 GN=ndufs1.L PE=1 SV=1 - [Q802B7_XENLA]	10.73	8	6	6	7		0			16.0751	10.73	6	7	727	79.5247	6.55127
Q66J07	nnt.L	Proton-translocating NAD(P)(+) transhydrogenase	Xenopus laevis	Proton-translocating NAD(P)(+) transhydrogenase OS=Xenopus laevis OX=8355 GN=nnt.L PE=1 SV=1 - [Q66J07_XENLA]	6.54	4	6	6	7		0			15.2023	6.54	6	7	1086	113.927	7.06396
A0A1L8HWE8	gamt.L	Guanidinoacetate N-methyltransferase	Xenopus laevis	Guanidinoacetate N-methyltransferase OS=Xenopus laevis OX=8355 GN=gamt.L PE=1 SV=1 - [A0A1L8HWE8_XENLA]	17.17	2	2	3	7		0			19.4217	17.17	3	7	233	26.6202	5.57959
A0A1L8HSP3	cct7.L	T-complex protein 1 subunit eta	Xenopus laevis	T-complex protein 1 subunit eta OS=Xenopus laevis OX=8355 GN=cct7.L PE=1 SV=1 - [A0A1L8HSP3_XENLA]	15.29	11	7	7	7		0			11.9307	15.29	7	7	543	59.0697	6.34131
A0A1L8HDP1	XELAEV_18011887mg	14_3_3 domain-containing protein	Xenopus laevis	14_3_3 domain-containing protein OS=Xenopus laevis OX=8355 GN=XELAEV_18011887mg PE=3 SV=1 - [A0A1L8HDP1_XENLA]	12.45	11	1	3	7		0			15.6099	12.45	3	7	233	26.4452	4.86865
A0A1L8H4S4	rpl23a.L	Ribosomal_L23eN domain-containing protein	Xenopus laevis	Ribosomal_L23eN domain-containing protein OS=Xenopus laevis OX=8355 GN=rpl23a.L PE=1 SV=1 - [A0A1L8H4S4_XENLA]	27.1	5	4	4	7		0			11.5663	27.1	4	7	155	17.6631	10.3892
Q7SZ34	stmn1.S	Stathmin	Xenopus laevis	Stathmin OS=Xenopus laevis OX=8355 GN=stmn1.S PE=2 SV=1 - [Q7SZ34_XENLA]	32.41	11	2	4	7		0			11.804	32.41	4	7	145	16.7387	5.79541
Q0IHG1	rplp2.L	60S acidic ribosomal protein P2	Xenopus laevis	60S acidic ribosomal protein P2 OS=Xenopus laevis OX=8355 GN=rplp2.L PE=2 SV=1 - [Q0IHG1_XENLA]	50.43	3	3	3	7		0			19.7261	50.43	3	7	115	11.6478	4.58936
D0EUZ9	Bcl9	B-cell lymphoma 9	Xenopus laevis	B-cell lymphoma 9 OS=Xenopus laevis OX=8355 GN=Bcl9 PE=2 SV=1 - [D0EUZ9_XENLA]	6.72	27	5	5	7		0			19.2601	6.72	5	7	1473	156.547	9.01221
A0A6I8PMN9	rpsa	40S ribosomal protein SA	Xenopus tropicalis	40S ribosomal protein SA OS=Xenopus tropicalis OX=8364 GN=rpsa PE=3 SV=1 - [A0A6I8PMN9_XENTR]	23.39	5	2	5	7		0			17.5505	23.39	5	7	295	32.8173	4.86865
A0A803JK12	sdhb	Succinate dehydrogenase [ubiquinone] iron-sulfur subunit, mitochondrial	Xenopus tropicalis	Succinate dehydrogenase [ubiquinone] iron-sulfur subunit, mitochondrial OS=Xenopus tropicalis OX=8364 GN=sdhb PE=4 SV=1 - [A0A803JK12_XENTR]	16.18	8	4	4	7		0			19.154	16.18	4	7	272	30.9392	8.22119
A0A803JMH6	rps27	Ribosomal protein S27	Xenopus tropicalis	Ribosomal protein S27 OS=Xenopus tropicalis OX=8364 GN=rps27 PE=4 SV=1 - [A0A803JMH6_XENTR]	38.55	8	1	3	7					17.7134	38.55	3	7	83	9.35778	9.45166
Q6DTN6	ppia.L	Peptidyl-prolyl cis-trans isomerase	Xenopus laevis	Peptidyl-prolyl cis-trans isomerase OS=Xenopus laevis OX=8355 GN=ppia.L PE=2 SV=1 - [Q6DTN6_XENLA]	21.95	7	1	2	6		0			12.7237	21.95	2	6	164	17.7088	8.74854
Q5XHJ8	gsn.S	Actin-depolymerizing factor	Xenopus laevis	Actin-depolymerizing factor OS=Xenopus laevis OX=8355 GN=gsn.S PE=1 SV=1 - [Q5XHJ8_XENLA]	10.01	6	5	5	6		0			10.6663	10.01	5	6	729	80.4471	5.37646
Q6GQ98	crat.S	MGC80234 protein	Xenopus laevis	MGC80234 protein OS=Xenopus laevis OX=8355 GN=crat.S PE=2 SV=1 - [Q6GQ98_XENLA]	11.15	7	3	3	6		0			13.9947	11.15	3	6	610	68.8373	7.1665
Q6IND5	vwa5a.2.L	MGC83495 protein	Xenopus laevis	MGC83495 protein OS=Xenopus laevis OX=8355 GN=vwa5a.2.L PE=2 SV=1 - [Q6IND5_XENLA]	8.13	15	5	5	6		0			13.7145	8.13	5	6	861	94.4282	4.83057
Q6PAD4	tkt.L	MGC68785 protein	Xenopus laevis	MGC68785 protein OS=Xenopus laevis OX=8355 GN=tkt.L PE=2 SV=1 - [Q6PAD4_XENLA]	9.41	10	4	6	6		0			10.2563	9.41	6	6	627	67.9679	7.7085
Q7ZYU4	XELAEV_18037805mg	40S ribosomal protein S9	Xenopus laevis	40S ribosomal protein S9 OS=Xenopus laevis OX=8355 GN=XELAEV_18037805mg PE=1 SV=1 - [Q7ZYU4_XENLA]	26.8	9	6	6	6		0			12.9702	26.8	6	6	194	22.5636	10.5796
A0A1L8HIK3	XELAEV_18013612mg	IF rod domain-containing protein	Xenopus laevis	IF rod domain-containing protein OS=Xenopus laevis OX=8355 GN=XELAEV_18013612mg PE=3 SV=1 - [A0A1L8HIK3_XENLA]	6.76	23	1	4	8	6.04364	4.17	2	2	7.43865	4.37	3	6	503	53.6883	8.47021
A0A1L8HCN3	XELAEV_18011525mg	CCT-theta	Xenopus laevis	CCT-theta OS=Xenopus laevis OX=8355 GN=XELAEV_18011525mg PE=3 SV=1 - [A0A1L8HCN3_XENLA]	11.17	10	5	5	6		0			13.1247	11.17	5	6	546	59.3033	5.52881
A0A1L8H820	XELAEV_18015309mg	Uncharacterized protein	Xenopus laevis	Uncharacterized protein OS=Xenopus laevis OX=8355 GN=XELAEV_18015309mg PE=1 SV=1 - [A0A1L8H820_XENLA]	11.62	3	3	4	6		0			12.6222	11.62	4	6	482	51.1233	8.68994
A0A1L8H748	sars1.S	Seryl-tRNA synthetase	Xenopus laevis	Seryl-tRNA synthetase OS=Xenopus laevis OX=8355 GN=sars1.S PE=1 SV=1 - [A0A1L8H748_XENLA]	14.48	5	5	5	6		0			14.8794	14.48	5	6	511	58.3157	6.30322
A4FVF5	XB5843130.S	60S acidic ribosomal protein P2	Xenopus laevis	60S acidic ribosomal protein P2 OS=Xenopus laevis OX=8355 GN=XB5843130.S PE=2 SV=1 - [A4FVF5_XENLA]	53.15	5	2	4	7	1.80632	10.81	1	1	13.5824	53.15	4	6	111	11.1766	4.61475
A0A1L8GHL2	XELAEV_18025862mg	Uncharacterized protein	Xenopus laevis	Uncharacterized protein OS=Xenopus laevis OX=8355 GN=XELAEV_18025862mg PE=3 SV=1 - [A0A1L8GHL2_XENLA]	18.52	6	3	3	6		0			19.0644	18.52	3	6	135	15.7707	11.3706
A0A1L8FRG2	rpl15.S	Ribosomal protein L15	Xenopus laevis	Ribosomal protein L15 OS=Xenopus laevis OX=8355 GN=rpl15.S PE=1 SV=1 - [A0A1L8FRG2_XENLA]	20.59	4	4	4	7	2.37344	6.86	1	1	14.1687	20.59	4	6	204	24.045	11.4585
A0A1L8F4Y5	XELAEV_18042888mg	T-complex protein 1 subunit gamma	Xenopus laevis	T-complex protein 1 subunit gamma OS=Xenopus laevis OX=8355 GN=XELAEV_18042888mg PE=1 SV=1 - [A0A1L8F4Y5_XENLA]	12.01	5	4	4	6		0			15.5603	12.01	4	6	508	56.3663	6.21436
A0A1L8EUL7	avd.2.L	Uncharacterized protein	Xenopus laevis	Uncharacterized protein OS=Xenopus laevis OX=8355 GN=avd.2.L PE=3 SV=1 - [A0A1L8EUL7_XENLA]	33.12	1	4	4	8	11.5983	14.94	1	2	18.962	28.57	3	6	154	16.7384	7.34229
A0A1L8EQX4	XELAEV_18047771mg	40S ribosomal protein S2	Xenopus laevis	40S ribosomal protein S2 OS=Xenopus laevis OX=8355 GN=XELAEV_18047771mg PE=3 SV=1 - [A0A1L8EQX4_XENLA]	14.23	6	3	3	6		0			16.8994	14.23	3	6	281	30.2851	10.1548
A0A310UEC1	rpl11.S	60S ribosomal protein L11	Xenopus laevis	60S ribosomal protein L11 OS=Xenopus laevis OX=8355 GN=rpl11.S PE=1 SV=1 - [A0A310UEC1_XENLA]	18.56	8	3	3	6		0			15.8716	18.56	3	6	167	19.0212	9.92041
Q6EE52	60S ribosomal protein L13 (Fragment) OS=Xenopus laevis OX=8355	60S ribosomal protein L13 (Fragment)	Xenopus laevis	60S ribosomal protein L13 (Fragment) OS=Xenopus laevis OX=8355 PE=2 SV=1 - [Q6EE52_XENLA]	20.79	5	3	3	6		0			15.7645	20.79	3	6	178	20.3256	11.7954
A0A6I8Q5B3	rangrf	RAN guanine nucleotide release factor	Xenopus tropicalis	RAN guanine nucleotide release factor OS=Xenopus tropicalis OX=8364 GN=rangrf PE=3 SV=2 - [A0A6I8Q5B3_XENTR]	12.25	6	3	3	6		0			17.5283	12.25	3	6	302	33.3321	9.53955
Q9PSN9	Lipovitellin 1, PCDZN=ZN(2+)- and CD(2+)-binding protein (Fragments) OS=Xenopus laevis OX=8355	Lipovitellin 1, PCDZN=ZN(2+)- and CD(2+)-binding protein (Fragments)	Xenopus laevis	Lipovitellin 1, PCDZN=ZN(2+)- and CD(2+)-binding protein (Fragments) OS=Xenopus laevis OX=8355 PE=1 SV=1 - [Q9PSN9_XENLA]	56.82	1	1	3	6		0			19.3272	56.82	3	6	44	5.25473	4.89404
A0A1L8F516	rps27.S	40S ribosomal protein S27	Xenopus laevis	40S ribosomal protein S27 OS=Xenopus laevis OX=8355 GN=rps27.S PE=3 SV=1 - [A0A1L8F516_XENLA]	38.1	7	1	3	6					17.194	38.1	3	6	84	9.46885	9.45166
Q0IH65	XB5733004.L	LOC733268 protein	Xenopus laevis	LOC733268 protein OS=Xenopus laevis OX=8355 GN=XB5733004.L PE=2 SV=1 - [Q0IH65_XENLA]	18.44	2	2	2	6					13.1536	18.44	2	6	244	26.5123	4.81787
Q4FZP3	cox6a1.L	Cytochrome c oxidase subunit	Xenopus laevis	Cytochrome c oxidase subunit OS=Xenopus laevis OX=8355 GN=cox6a1.L PE=2 SV=1 - [Q4FZP3_XENLA]	26.13	5	2	2	6					19.0147	26.13	2	6	111	12.3474	9.24658
Q5PQ49	mgst3.L	LOC495981 protein	Xenopus laevis	LOC495981 protein OS=Xenopus laevis OX=8355 GN=mgst3.L PE=1 SV=1 - [Q5PQ49_XENLA]	21.77	4	3	3	6					13.1342	21.77	3	6	147	16.2124	9.39307
A1L3K2	LOC100037030	Pyruvate kinase	Xenopus laevis	Pyruvate kinase OS=Xenopus laevis OX=8355 GN=LOC100037030 PE=2 SV=1 - [A1L3K2_XENLA]	17.89	7	2	6	7	2.04952	4.14	1	2	10.6269	13.75	5	5	531	57.808	7.47412
A0A1L8HCL3	sod1.L	Superoxide dismutase [Cu-Zn]	Xenopus laevis	Superoxide dismutase [Cu-Zn] OS=Xenopus laevis OX=8355 GN=sod1.L PE=3 SV=1 - [A0A1L8HCL3_XENLA]	37.75	2	4	4	5		0			12.6471	37.75	4	5	151	15.4085	5.89697
Q28I74	rps13	40S ribosomal protein S13	Xenopus tropicalis	40S ribosomal protein S13 OS=Xenopus tropicalis OX=8364 GN=rps13 PE=2 SV=1 - [Q28I74_XENTR]	13.25	4	3	3	5		0			11.8467	13.25	3	5	151	17.2397	10.6089
Q7SZA8	rpl18.L	Rpl18-b protein	Xenopus laevis	Rpl18-b protein OS=Xenopus laevis OX=8355 GN=rpl18.L PE=2 SV=1 - [Q7SZA8_XENLA]	20.21	2	1	3	5		0			13.2271	20.21	3	5	188	21.6101	11.7075
Q6P699	rplp1.L	MGC68562 protein	Xenopus laevis	MGC68562 protein OS=Xenopus laevis OX=8355 GN=rplp1.L PE=1 SV=1 - [Q6P699_XENLA]	51.33	1	1	2	5		0			15.4958	51.33	2	5	113	11.4366	4.28467
Q7ZSY1	lgals3.L	Galectin	Xenopus laevis	Galectin OS=Xenopus laevis OX=8355 GN=lgals3.L PE=2 SV=1 - [Q7ZSY1_XENLA]	20.69	2	4	4	5		0			11.4315	20.69	4	5	261	28.3141	6.78564
Q7ZX88	snd1.S	Staphylococcal nuclease domain-containing protein	Xenopus laevis	Staphylococcal nuclease domain-containing protein OS=Xenopus laevis OX=8355 GN=snd1.S PE=2 SV=1 - [Q7ZX88_XENLA]	6.73	14	5	5	5		0			9.06016	6.73	5	5	906	101.379	6.87354
A0A1L8GYF6	XELAEV_18017507mg	60S ribosomal protein L18a	Xenopus laevis	60S ribosomal protein L18a OS=Xenopus laevis OX=8355 GN=XELAEV_18017507mg PE=3 SV=1 - [A0A1L8GYF6_XENLA]	30.61	11	4	4	5		0			11.8878	30.61	4	5	147	17.4443	10.9165
A0A1L8FYX8	XELAEV_18031993mg	UBC core domain-containing protein	Xenopus laevis	UBC core domain-containing protein OS=Xenopus laevis OX=8355 GN=XELAEV_18031993mg PE=1 SV=1 - [A0A1L8FYX8_XENLA]	21.17	19	3	3	6	2.4989	6.57	1	1	7.72637	21.17	3	5	137	15.7319	7.18115
A0A310U4X8	XELAEV_18000200mg	Glyceraldehyde-3-phosphate dehydrogenase (Fragment)	Xenopus laevis	Glyceraldehyde-3-phosphate dehydrogenase (Fragment) OS=Xenopus laevis OX=8355 GN=XELAEV_18000200mg PE=3 SV=1 - [A0A310U4X8_XENLA]	15.99	1	3	3	5		0			10.2374	15.99	3	5	294	31.4182	8.99756
Q3KPV0	akr7a2.L	MGC131303 protein	Xenopus laevis	MGC131303 protein OS=Xenopus laevis OX=8355 GN=akr7a2.L PE=2 SV=1 - [Q3KPV0_XENLA]	13.81	3	4	4	5		0			8.84667	13.81	4	5	333	37.8368	7.07861
A0A803JJ57	mcm5	DNA replication licensing factor mcm5	Xenopus tropicalis	DNA replication licensing factor mcm5 OS=Xenopus tropicalis OX=8364 GN=mcm5 PE=4 SV=1 - [A0A803JJ57_XENTR]	10.48	5	5	5	5		0			9.82038	10.48	5	5	687	77.5688	8.55811
A0A6I8RYR5	etfa	Electron transfer flavoprotein subunit alpha	Xenopus tropicalis	Electron transfer flavoprotein subunit alpha OS=Xenopus tropicalis OX=8364 GN=etfa PE=3 SV=1 - [A0A6I8RYR5_XENTR]	17.93	7	4	4	5		0			6.37474	17.93	4	5	329	34.7322	8.04541
Q6P2W6	tubb4	Elongation factor Tu (Fragment)	Xenopus tropicalis	Elongation factor Tu (Fragment) OS=Xenopus tropicalis OX=8364 GN=tubb4 PE=2 SV=1 - [Q6P2W6_XENTR]	7.1	3	3	3	5		0			11.2028	7.1	3	5	451	49.4104	6.84424
A0A6I8RYD8	kpnb1	Karyopherin (importin) beta 1	Xenopus tropicalis	Karyopherin (importin) beta 1 OS=Xenopus tropicalis OX=8364 GN=kpnb1 PE=3 SV=2 - [A0A6I8RYD8_XENTR]	5.31	6	4	4	5		0			6.99373	5.31	4	5	848	94.1435	4.86865
A0A803KCX3	Uncharacterized protein OS=Xenopus tropicalis OX=8364	Uncharacterized protein	Xenopus tropicalis	Uncharacterized protein OS=Xenopus tropicalis OX=8364 PE=4 SV=1 - [A0A803KCX3_XENTR]	25.4	55	2	2	5		0			11.2741	25.4	2	5	126	13.5266	10.7261
A0A7D9NJS8	csde1	Isocitrate dehydrogenase [NAD] subunit, mitochondrial	Xenopus tropicalis	Isocitrate dehydrogenase [NAD] subunit, mitochondrial OS=Xenopus tropicalis OX=8364 GN=csde1 PE=3 SV=2 - [A0A7D9NJS8_XENTR]	10.96	10	1	3	5		0			8.78824	10.96	3	5	356	39.6844	8.52881
Q6DEP8	rpl30	60S ribosomal protein L30	Xenopus tropicalis	60S ribosomal protein L30 OS=Xenopus tropicalis OX=8364 GN=rpl30 PE=2 SV=1 - [Q6DEP8_XENTR]	50.86	7	4	4	5		0			10.7238	50.86	4	5	116	12.9038	9.62744
A0A1L8F736	gatd3alc.1.L	Uncharacterized protein	Xenopus laevis	Uncharacterized protein OS=Xenopus laevis OX=8355 GN=gatd3alc.1.L PE=4 SV=1 - [A0A1L8F736_XENLA]	20.44	6	4	4	5					5.58463	20.44	4	5	225	24.1233	7.13721
Q68F82	rpl12	60S ribosomal protein L12	Xenopus tropicalis	60S ribosomal protein L12 OS=Xenopus tropicalis OX=8364 GN=rpl12 PE=2 SV=1 - [Q68F82_XENTR]	36.6	10	4	4	5					13.2507	36.6	4	5	153	16.3978	9.5249
A0A090B2N7	mcm3.L	DNA helicase	Xenopus laevis	DNA helicase OS=Xenopus laevis OX=8355 GN=mcm3.L PE=1 SV=1 - [A0A090B2N7_XENLA]	5.33	12	4	4	5	0	1.61	1	1	6.42669	5.33	4	4	807	90.349	6.78564
A0A1L8ERX6	rpl19.L	Ribosomal protein L19	Xenopus laevis	Ribosomal protein L19 OS=Xenopus laevis OX=8355 GN=rpl19.L PE=3 SV=1 - [A0A1L8ERX6_XENLA]	13.2	3	2	2	4		0			11.8753	13.2	2	4	197	23.4662	11.4731
A1L3K3	LOC100037031	LOC100037031 protein (Fragment)	Xenopus laevis	LOC100037031 protein (Fragment) OS=Xenopus laevis OX=8355 GN=LOC100037031 PE=2 SV=1 - [A1L3K3_XENLA]	19.33	14	1	4	4		0			10.4191	19.33	4	4	269	30.3202	4.7417
Q6AZL9	rps23.S	40S ribosomal protein S23	Xenopus laevis	40S ribosomal protein S23 OS=Xenopus laevis OX=8355 GN=rps23.S PE=1 SV=1 - [Q6AZL9_XENLA]	21.68	3	4	4	4		0			8.32692	21.68	4	4	143	15.7587	10.4771
Q6DCF9	anxa7.L	Annexin	Xenopus laevis	Annexin OS=Xenopus laevis OX=8355 GN=anxa7.L PE=2 SV=1 - [Q6DCF9_XENLA]	5.96	7	3	3	4		0			8.35159	5.96	3	4	520	53.9634	7.1665
Q7ZTM0	cct5.S	CCT-epsilon	Xenopus laevis	CCT-epsilon OS=Xenopus laevis OX=8355 GN=cct5.S PE=2 SV=1 - [Q7ZTM0_XENLA]	9.8	6	1	3	4		0			6.68514	9.8	3	4	541	59.55	6.13818
Q7SZA4	rpl18.S	MGC64315 protein	Xenopus laevis	MGC64315 protein OS=Xenopus laevis OX=8355 GN=rpl18.S PE=2 SV=1 - [Q7SZA4_XENLA]	20.21	6	1	3	4		0			11.8838	20.21	3	4	188	21.536	11.7075
Q66IN5	XB5768883.L	MGC86492 protein	Xenopus laevis	MGC86492 protein OS=Xenopus laevis OX=8355 GN=XB5768883.L PE=2 SV=1 - [Q66IN5_XENLA]	10.71	1	3	3	4		0			5.75358	10.71	3	4	644	70.1828	4.32275
Q66KP7	rps28p9.L	40S ribosomal protein S28	Xenopus laevis	40S ribosomal protein S28 OS=Xenopus laevis OX=8355 GN=rps28p9.L PE=2 SV=1 - [Q66KP7_XENLA]	56.52	3	4	4	4		0			6.54953	56.52	4	4	69	7.8332	10.6968
A0A1L8HVG4	shroom3.L	Uncharacterized protein	Xenopus laevis	Uncharacterized protein OS=Xenopus laevis OX=8355 GN=shroom3.L PE=3 SV=1 - [A0A1L8HVG4_XENLA]	1.68	11	3	3	4		0			9.61901	1.68	3	4	1788	200.596	7.21045
A0A1L8HNB7	ndufa7.S	Complex I-B14.5a	Xenopus laevis	Complex I-B14.5a OS=Xenopus laevis OX=8355 GN=ndufa7.S PE=3 SV=1 - [A0A1L8HNB7_XENLA]	24.44	5	1	3	4		0			9.83336	24.44	3	4	135	14.7397	10.2134
A0A1L8FZB2	XELAEV_18032136mg	Uncharacterized protein	Xenopus laevis	Uncharacterized protein OS=Xenopus laevis OX=8355 GN=XELAEV_18032136mg PE=3 SV=1 - [A0A1L8FZB2_XENLA]	17.59	3	2	2	4		0			9.41527	17.59	2	4	108	11.9623	9.42236
A0A1L8FNR9	rps19.L	40S ribosomal protein S19	Xenopus laevis	40S ribosomal protein S19 OS=Xenopus laevis OX=8355 GN=rps19.L PE=3 SV=1 - [A0A1L8FNR9_XENLA]	24.83	6	4	4	4		0			9.73899	24.83	4	4	145	16.0496	10.4185
A0A1L8FJX9	XELAEV_18034852mg	Inorganic diphosphatase	Xenopus laevis	Inorganic diphosphatase OS=Xenopus laevis OX=8355 GN=XELAEV_18034852mg PE=3 SV=1 - [A0A1L8FJX9_XENLA]	12.11	7	3	3	4		0			5.1735	12.11	3	4	289	33.0105	5.47803
A0A1L8EWY3	XELAEV_18044959mg	Elongation factor 1-beta	Xenopus laevis	Elongation factor 1-beta OS=Xenopus laevis OX=8355 GN=XELAEV_18044959mg PE=1 SV=1 - [A0A1L8EWY3_XENLA]	12.33	11	1	2	4		0			11.3152	12.33	2	4	227	25.1316	4.7417
A0AUT4	LOC100036778	CCT-epsilon	Xenopus laevis	CCT-epsilon OS=Xenopus laevis OX=8355 GN=LOC100036778 PE=2 SV=1 - [A0AUT4_XENLA]	9.38	7	1	3	4		0			9.89593	9.38	3	4	533	58.6083	6.49365
F7ABN1	sgk1	Chaperonin containing TCP1 subunit 6A	Xenopus tropicalis	Chaperonin containing TCP1 subunit 6A OS=Xenopus tropicalis OX=8364 GN=sgk1 PE=3 SV=3 - [F7ABN1_XENTR]	7.8	6	3	3	4		0			9.94935	7.8	3	4	487	53.2951	7.48877
A0A7D9NLJ1	pdlim4	Hydroxysteroid dehydrogenase-like protein 2	Xenopus tropicalis	Hydroxysteroid dehydrogenase-like protein 2 OS=Xenopus tropicalis OX=8364 GN=pdlim4 PE=4 SV=2 - [A0A7D9NLJ1_XENTR]	8.33	1	2	2	4		0			13.652	8.33	2	4	384	40.7259	6.87354
A0A1B8Y853	XENTR_v90029512mg	Histone H4	Xenopus tropicalis	Histone H4 OS=Xenopus tropicalis OX=8364 GN=XENTR_v90029512mg PE=3 SV=1 - [A0A1B8Y853_XENTR]	14.72	26	3	3	4		0			8.42619	14.72	3	4	231	25.5371	10.7993
F6TE47	lpcat1	Ribosomal protein L24	Xenopus tropicalis	Ribosomal protein L24 OS=Xenopus tropicalis OX=8364 GN=lpcat1 PE=3 SV=3 - [F6TE47_XENTR]	21.9	8	3	3	4		0			9.60689	21.9	3	4	137	15.9707	10.7847
A0A1B8XT51	XENTR_v90029271mg	40S ribosomal protein S25 (Fragment)	Xenopus tropicalis	40S ribosomal protein S25 (Fragment) OS=Xenopus tropicalis OX=8364 GN=XENTR_v90029271mg PE=3 SV=1 - [A0A1B8XT51_XENTR]	26.47	2	2	2	4		0			10.3246	26.47	2	4	68	7.69143	10.0669
Q28IZ0	aifm1	Apoptosis-inducing factor, mitochondria-associated 1	Xenopus tropicalis	Apoptosis-inducing factor, mitochondria-associated 1 OS=Xenopus tropicalis OX=8364 GN=aifm1 PE=2 SV=1 - [Q28IZ0_XENTR]	6.6	3	3	3	4		0			12.7591	6.6	3	4	636	69.4346	6.93213
Q6DDS8	N1	N1/N2 protein	Xenopus laevis	N1/N2 protein OS=Xenopus laevis OX=8355 GN=N1 PE=2 SV=1 - [Q6DDS8_XENLA]	10.05	4	3	3	4					4.5727	10.05	3	4	418	45.8291	4.50049
A2VDE6	LOC100037235	Thioredoxin	Xenopus laevis	Thioredoxin OS=Xenopus laevis OX=8355 GN=LOC100037235 PE=1 SV=1 - [A2VDE6_XENLA]	37.14	1	2	3	4					9.74215	37.14	3	4	105	11.8569	5.05908
A0A1L8GJV4	XELAEV_18022248mg	Uncharacterized protein	Xenopus laevis	Uncharacterized protein OS=Xenopus laevis OX=8355 GN=XELAEV_18022248mg PE=1 SV=1 - [A0A1L8GJV4_XENLA]	9.4	5	3	3	4					6.83531	9.4	3	4	436	49.8312	7.38623
Q66KV2	rpl38.L	60S ribosomal protein L38	Xenopus laevis	60S ribosomal protein L38 OS=Xenopus laevis OX=8355 GN=rpl38.L PE=2 SV=1 - [Q66KV2_XENLA]	28.57	6	2	2	4					8.2632	28.57	2	4	70	8.20072	10.0522
A0A1L8ELW9	cox4i2.S	Cytochrome c oxidase subunit 4	Xenopus laevis	Cytochrome c oxidase subunit 4 OS=Xenopus laevis OX=8355 GN=cox4i2.S PE=3 SV=1 - [A0A1L8ELW9_XENLA]	20.69	3	2	2	4					8.56464	20.69	2	4	174	20.5326	9.36377
Q66KG8	crkl.L	MGC84382 protein	Xenopus laevis	MGC84382 protein OS=Xenopus laevis OX=8355 GN=crkl.L PE=2 SV=1 - [Q66KG8_XENLA]	12.25	6	1	2	3		0			10.4233	12.25	2	3	302	33.568	6.65381
Q6NTZ1	crkl.S	MGC81407 protein	Xenopus laevis	MGC81407 protein OS=Xenopus laevis OX=8355 GN=crkl.S PE=1 SV=1 - [Q6NTZ1_XENLA]	12.25	6	1	2	3		0			9.3813	12.25	2	3	302	33.622	6.65381
Q05BI7	MGC64447	Prohibitin	Xenopus laevis	Prohibitin OS=Xenopus laevis OX=8355 GN=MGC64447 PE=2 SV=1 - [Q05BI7_XENLA]	11.76	6	3	3	3		0			3.24942	11.76	3	3	255	27.8787	5.2876
Q3KPK1	tbcb.S	MGC132396 protein	Xenopus laevis	MGC132396 protein OS=Xenopus laevis OX=8355 GN=tbcb.S PE=1 SV=1 - [Q3KPK1_XENLA]	9.35	4	2	2	4	1.8809	4.88	1	1	4.27801	9.35	2	3	246	27.5045	5.08447
Q5U4I5	dnpep.S	Aspartyl aminopeptidase	Xenopus laevis	Aspartyl aminopeptidase OS=Xenopus laevis OX=8355 GN=dnpep.S PE=1 SV=1 - [Q5U4I5_XENLA]	5.64	5	2	2	4	2.81861	3.13	1	1	5.57305	5.64	2	3	479	52.8177	6.7124
Q6DFI3	mpst.L	Tst-prov protein	Xenopus laevis	Tst-prov protein OS=Xenopus laevis OX=8355 GN=mpst.L PE=2 SV=1 - [Q6DFI3_XENLA]	11.37	7	3	3	3		0			3.95443	11.37	3	3	299	33.6856	6.7417
Q6DJQ0	rpl26.L	KOW domain-containing protein	Xenopus laevis	KOW domain-containing protein OS=Xenopus laevis OX=8355 GN=rpl26.L PE=1 SV=1 - [Q6DJQ0_XENLA]	12.41	3	2	2	3		0			1.79925	12.41	2	3	145	17.1795	10.5503
Q6GQC6	rplp2.S	60S acidic ribosomal protein P2	Xenopus laevis	60S acidic ribosomal protein P2 OS=Xenopus laevis OX=8355 GN=rplp2.S PE=1 SV=1 - [Q6GQC6_XENLA]	21.74	1	2	2	3		0			7.42937	21.74	2	3	115	11.6247	4.50049
Q7ZTK9	got1.S	Aspartate aminotransferase	Xenopus laevis	Aspartate aminotransferase OS=Xenopus laevis OX=8355 GN=got1.S PE=1 SV=1 - [Q7ZTK9_XENLA]	9.98	6	3	3	3		0			2.29358	9.98	3	3	411	46.0412	7.44482
Q7ZX44	txndc5.L	Txndc5-prov protein	Xenopus laevis	Txndc5-prov protein OS=Xenopus laevis OX=8355 GN=txndc5.L PE=2 SV=1 - [Q7ZX44_XENLA]	8.44	2	2	3	3		0			3.7896	8.44	3	3	403	45.8596	6.17627
Q7ZXG3	eif5a.L	Eukaryotic translation initiation factor 5A	Xenopus laevis	Eukaryotic translation initiation factor 5A OS=Xenopus laevis OX=8355 GN=eif5a.L PE=1 SV=1 - [Q7ZXG3_XENLA]	12.34	5	2	2	3		0			6.68001	12.34	2	3	154	16.6933	5.80811
Q7SZB0	rpl35a.S	60S ribosomal protein L35a	Xenopus laevis	60S ribosomal protein L35a OS=Xenopus laevis OX=8355 GN=rpl35a.S PE=2 SV=1 - [Q7SZB0_XENLA]	16.36	3	2	2	3		0			6.45114	16.36	2	3	110	12.5406	10.8726
A0A1L8HD77	XELAEV_18011715mg	SMB domain-containing protein	Xenopus laevis	SMB domain-containing protein OS=Xenopus laevis OX=8355 GN=XELAEV_18011715mg PE=4 SV=1 - [A0A1L8HD77_XENLA]	9.83	8	3	3	3		0			6.34661	9.83	3	3	356	41.6564	8.55811
A0A1L8HAX7	XELAEV_18016290mg	Uncharacterized protein	Xenopus laevis	Uncharacterized protein OS=Xenopus laevis OX=8355 GN=XELAEV_18016290mg PE=1 SV=1 - [A0A1L8HAX7_XENLA]	8.33	5	2	2	3		0			4.97491	8.33	2	3	420	44.0607	8.55811
A0A1L8GT45	XELAEV_18020716mg	Uncharacterized protein	Xenopus laevis	Uncharacterized protein OS=Xenopus laevis OX=8355 GN=XELAEV_18020716mg PE=1 SV=1 - [A0A1L8GT45_XENLA]	4.08	4	1	1	3		0			8.04534	4.08	1	3	319	34.4075	7.12256
Q66KW1	rpl29.S	60S ribosomal protein L29	Xenopus laevis	60S ribosomal protein L29 OS=Xenopus laevis OX=8355 GN=rpl29.S PE=2 SV=1 - [Q66KW1_XENLA]	16	1	1	1	3		0			7.96279	16	1	3	75	8.56559	11.605
A0A1L8GGG0	XELAEV_18025391mg	Ribosomal_L18_c domain-containing protein	Xenopus laevis	Ribosomal_L18_c domain-containing protein OS=Xenopus laevis OX=8355 GN=XELAEV_18025391mg PE=3 SV=1 - [A0A1L8GGG0_XENLA]	9.45	6	2	2	3		0			7.40956	9.45	2	3	275	31.3192	9.26123
A0A1L8G5L9	XELAEV_18030252mg	Enoyl-CoA hydratase	Xenopus laevis	Enoyl-CoA hydratase OS=Xenopus laevis OX=8355 GN=XELAEV_18030252mg PE=1 SV=1 - [A0A1L8G5L9_XENLA]	5.63	3	3	3	3		0			7.88988	5.63	3	3	746	80.7875	8.93896
A8WH57	cpvl.L	LOC100127263 protein	Xenopus laevis	LOC100127263 protein OS=Xenopus laevis OX=8355 GN=cpvl.L PE=1 SV=1 - [A8WH57_XENLA]	8.11	1	3	3	3		0			5.79314	8.11	3	3	481	54.4749	5.42725
A0A1L8FV38	XELAEV_18030618mg	Diadenosine tetraphosphate synthetase	Xenopus laevis	Diadenosine tetraphosphate synthetase OS=Xenopus laevis OX=8355 GN=XELAEV_18030618mg PE=1 SV=1 - [A0A1L8FV38_XENLA]	4.02	7	3	3	3		0			6.01645	4.02	3	3	747	84.2022	7.32764
A0A1L8FS49	txndc5.S	Uncharacterized protein	Xenopus laevis	Uncharacterized protein OS=Xenopus laevis OX=8355 GN=txndc5.S PE=1 SV=1 - [A0A1L8FS49_XENLA]	9.16	5	2	3	3		0			6.77001	9.16	3	3	404	45.9047	5.94775
A0A1L8FGR5	isoc2.S	Isochorismatase domain-containing protein	Xenopus laevis	Isochorismatase domain-containing protein OS=Xenopus laevis OX=8355 GN=isoc2.S PE=1 SV=1 - [A0A1L8FGR5_XENLA]	16.02	1	3	3	3		0			5.35551	16.02	3	3	231	25.5253	7.72314
A0AUT2	usp5.S	Ubiquitin carboxyl-terminal hydrolase	Xenopus laevis	Ubiquitin carboxyl-terminal hydrolase OS=Xenopus laevis OX=8355 GN=usp5.S PE=1 SV=1 - [A0AUT2_XENLA]	5.17	6	3	3	3		0			7.25899	5.17	3	3	832	92.9137	5.22412
A0A1L8ET41	XELAEV_18043568mg	OGFr_N domain-containing protein	Xenopus laevis	OGFr_N domain-containing protein OS=Xenopus laevis OX=8355 GN=XELAEV_18043568mg PE=1 SV=1 - [A0A1L8ET41_XENLA]	8.5	1	2	2	3		0			6.7716	8.5	2	3	718	83.0547	4.76709
A0A1L8ERQ6	XELAEV_18043110mg	IF rod domain-containing protein	Xenopus laevis	IF rod domain-containing protein OS=Xenopus laevis OX=8355 GN=XELAEV_18043110mg PE=3 SV=1 - [A0A1L8ERQ6_XENLA]	6.07	6	2	2	3		0			7.01643	6.07	2	3	412	45.3347	5.10986
B7ZS76	LOC398083	LOC398083 protein	Xenopus laevis	LOC398083 protein OS=Xenopus laevis OX=8355 GN=LOC398083 PE=2 SV=1 - [B7ZS76_XENLA]	2.5	19	3	3	3		0			5.40382	2.5	3	3	1962	226.556	5.5415
A5D8M8	nqo1.L	LOC100049751 protein	Xenopus laevis	LOC100049751 protein OS=Xenopus laevis OX=8355 GN=nqo1.L PE=2 SV=1 - [A5D8M8_XENLA]	15.11	2	3	3	3		0			4.91865	15.11	3	3	278	31.0324	7.09326
Q5XHE0	taldo1.L	Transaldolase	Xenopus laevis	Transaldolase OS=Xenopus laevis OX=8355 GN=taldo1.L PE=2 SV=1 - [Q5XHE0_XENLA]	6.8	6	2	2	3		0			6.5696	6.8	2	3	338	37.7065	6.21436
Q7SYP5	PdhE1beta-1	Pyruvate dehydrogenase E1 component subunit beta (Fragment)	Xenopus laevis	Pyruvate dehydrogenase E1 component subunit beta (Fragment) OS=Xenopus laevis OX=8355 GN=PdhE1beta-1 PE=2 SV=1 - [Q7SYP5_XENLA]	14.44	6	3	3	3		0			6.44235	14.44	3	3	270	28.9827	5.84619
Q7SZB6	LOC398653	60S acidic ribosomal protein P2 (Fragment)	Xenopus laevis	60S acidic ribosomal protein P2 (Fragment) OS=Xenopus laevis OX=8355 GN=LOC398653 PE=2 SV=1 - [Q7SZB6_XENLA]	32.29	7	1	3	4	1.80632	12.5	1	1	6.17825	32.29	3	3	96	9.61632	9.80322
Q6EE54	Ribosomal protein (Fragment) OS=Xenopus laevis OX=8355	Ribosomal protein (Fragment)	Xenopus laevis	Ribosomal protein (Fragment) OS=Xenopus laevis OX=8355 PE=2 SV=1 - [Q6EE54_XENLA]	11.96	7	3	3	3		0			4.76262	11.96	3	3	184	20.8556	9.68604
B1WBI5	prmt5	Protein arginine N-methyltransferase 5 (Fragment)	Xenopus tropicalis	Protein arginine N-methyltransferase 5 (Fragment) OS=Xenopus tropicalis OX=8364 GN=prmt5 PE=2 SV=1 - [B1WBI5_XENTR]	4.13	8	3	3	3		0			6.53299	4.13	3	3	629	71.8673	6.37939
A0A803KKB0	LOC496939	Hypothetical LOC496939	Xenopus tropicalis	Hypothetical LOC496939 OS=Xenopus tropicalis OX=8364 GN=LOC496939 PE=2 SV=1 - [A0A803KKB0_XENTR]	8.7	19	1	2	3		0			6.51375	8.7	2	3	253	27.995	4.729
A0A6I8R5M2	rpl31	60S ribosomal protein L31	Xenopus tropicalis	60S ribosomal protein L31 OS=Xenopus tropicalis OX=8364 GN=rpl31 PE=3 SV=1 - [A0A6I8R5M2_XENTR]	18.4	5	2	2	3		0			8.09758	18.4	2	3	125	14.5722	10.7993
A0A1B8Y9E6	XENTR_v90028522mg	IF rod domain-containing protein	Xenopus tropicalis	IF rod domain-containing protein OS=Xenopus tropicalis OX=8364 GN=XENTR_v90028522mg PE=3 SV=1 - [A0A1B8Y9E6_XENTR]	1.93	2	1	1	3		0			8.08604	1.93	1	3	414	46.5906	5.07178
A0A6I8R7V8	pfkm	ATP-dependent 6-phosphofructokinase	Xenopus tropicalis	ATP-dependent 6-phosphofructokinase OS=Xenopus tropicalis OX=8364 GN=pfkm PE=3 SV=2 - [A0A6I8R7V8_XENTR]	3.69	10	3	3	3		0			4.13334	3.69	3	3	758	82.9652	7.84033
A0A6I8RV38	trap1	TNF receptor-associated protein 1	Xenopus tropicalis	TNF receptor-associated protein 1 OS=Xenopus tropicalis OX=8364 GN=trap1 PE=3 SV=2 - [A0A6I8RV38_XENTR]	3.03	5	1	2	3		0			8.50021	3.03	2	3	692	78.5091	6.354
A0A803JG85	Uncharacterized protein OS=Xenopus tropicalis OX=8364	Uncharacterized protein	Xenopus tropicalis	Uncharacterized protein OS=Xenopus tropicalis OX=8364 PE=4 SV=1 - [A0A803JG85_XENTR]	7.2	72	2	2	3		0			2.12123	7.2	2	3	125	13.6507	7.38623
A0A6I8QA06	ostc	Oligosaccharyltransferase complex subunit	Xenopus tropicalis	Oligosaccharyltransferase complex subunit OS=Xenopus tropicalis OX=8364 GN=ostc PE=3 SV=1 - [A0A6I8QA06_XENTR]	8.33	2	1	1	3		0			8.45891	8.33	1	3	144	16.2785	9.17334
A0A1B8Y9N0	XENTR_v90028292mg	Uncharacterized protein	Xenopus tropicalis	Uncharacterized protein OS=Xenopus tropicalis OX=8364 GN=XENTR_v90028292mg PE=3 SV=1 - [A0A1B8Y9N0_XENTR]	5.5	6	2	2	3		0			5.74	5.5	2	3	400	42.8299	8.83643
A0A803JV86	ppp2r2a	Protein phosphatase 2 regulatory subunit B, alpha	Xenopus tropicalis	Protein phosphatase 2 regulatory subunit B, alpha OS=Xenopus tropicalis OX=8364 GN=ppp2r2a PE=4 SV=1 - [A0A803JV86_XENTR]	7.6	32	3	3	3		0			2.01941	7.6	3	3	421	49.1183	6.87354
Q6P7L5	ldha	L-lactate dehydrogenase	Xenopus tropicalis	L-lactate dehydrogenase OS=Xenopus tropicalis OX=8364 GN=ldha PE=2 SV=1 - [Q6P7L5_XENTR]	7.23	3	1	2	3		0			6.23355	7.23	2	3	332	36.5732	8.06006
Q6GN90	bola2.L	MGC82947 protein	Xenopus laevis	MGC82947 protein OS=Xenopus laevis OX=8355 GN=bola2.L PE=2 SV=1 - [Q6GN90_XENLA]	48.89	4	3	3	3					6.78106	48.89	3	3	90	10.1622	5.74463
Q8AVQ2	uqcrfs1.S	Cytochrome b-c1 complex subunit Rieske, mitochondrial	Xenopus laevis	Cytochrome b-c1 complex subunit Rieske, mitochondrial OS=Xenopus laevis OX=8355 GN=uqcrfs1.S PE=2 SV=1 - [Q8AVQ2_XENLA]	10.07	3	2	2	3					8.45085	10.07	2	3	268	28.6316	7.78174
A0A1L8H5M0	XB22164552.S	Cystatin domain-containing protein	Xenopus laevis	Cystatin domain-containing protein OS=Xenopus laevis OX=8355 GN=XB22164552.S PE=3 SV=1 - [A0A1L8H5M0_XENLA]	20	1	2	2	3					8.50679	20	2	3	100	11.2296	5.03369
A0A1L8EQQ4	XELAEV_18047701mg	Nucleoside diphosphate kinase	Xenopus laevis	Nucleoside diphosphate kinase OS=Xenopus laevis OX=8355 GN=XELAEV_18047701mg PE=1 SV=1 - [A0A1L8EQQ4_XENLA]	22.22	6	3	3	3					7.33019	22.22	3	3	180	19.8502	8.90967
A0A1L8EJX0	XELAEV_18003923mg	40S ribosomal protein S12 (Fragment)	Xenopus laevis	40S ribosomal protein S12 (Fragment) OS=Xenopus laevis OX=8355 GN=XELAEV_18003923mg PE=1 SV=1 - [A0A1L8EJX0_XENLA]	9.09	5	1	1	3					4.4171	9.09	1	3	110	11.8892	6.7417
Q6NTU5	Uncharacterized protein OS=Xenopus laevis OX=8355	Uncharacterized protein	Xenopus laevis	Uncharacterized protein OS=Xenopus laevis OX=8355 PE=2 SV=1 - [Q6NTU5_XENLA]	3.7	1	1	1	2		0			4.28633	3.7	1	2	243	26.9443	5.47803
A0A1L8HQD8	mapk1.S	Mitogen-activated protein kinase	Xenopus laevis	Mitogen-activated protein kinase OS=Xenopus laevis OX=8355 GN=mapk1.S PE=1 SV=1 - [A0A1L8HQD8_XENLA]	4.99	4	2	2	2		0			4.76737	4.99	2	2	361	41.2301	6.75635
B0JZY7	rpl35	60S ribosomal protein L35	Xenopus tropicalis	60S ribosomal protein L35 OS=Xenopus tropicalis OX=8364 GN=rpl35 PE=2 SV=1 - [B0JZY7_XENTR]	8.13	7	1	1	2		0			4.95567	8.13	1	2	123	14.3975	11.3853
Q32N33	chmp7.L	MGC68906 protein	Xenopus laevis	MGC68906 protein OS=Xenopus laevis OX=8355 GN=chmp7.L PE=2 SV=1 - [Q32N33_XENLA]	6.87	4	2	2	2		0			2.14237	6.87	2	2	422	47.6895	5.2876
Q4QR44	rps15a.S	40S ribosomal protein S15a	Xenopus laevis	40S ribosomal protein S15a OS=Xenopus laevis OX=8355 GN=rps15a.S PE=1 SV=1 - [Q4QR44_XENLA]	13.08	3	2	2	2		0			4.80501	13.08	2	2	130	14.846	10.0522
Q5XH78	pcbp2	Pcbp2 protein	Xenopus laevis	Pcbp2 protein OS=Xenopus laevis OX=8355 GN=pcbp2 PE=2 SV=1 - [Q5XH78_XENLA]	8.22	27	2	2	2		0			3.05774	8.22	2	2	353	37.148	7.72314
Q6DE32	cltb.S	Clathrin light chain	Xenopus laevis	Clathrin light chain OS=Xenopus laevis OX=8355 GN=cltb.S PE=2 SV=1 - [Q6DE32_XENLA]	15.12	5	2	2	2		0			0	15.12	2	2	205	23.1881	4.43701
Q7ZTJ1	slc25a3.L	Phosphate carrier protein, mitochondrial	Xenopus laevis	Phosphate carrier protein, mitochondrial OS=Xenopus laevis OX=8355 GN=slc25a3.L PE=1 SV=1 - [Q7ZTJ1_XENLA]	3.9	6	1	1	2		0			4.81013	3.9	1	2	359	39.8804	9.1001
Q6I803	s100a11.L	Calcium-binding protein p26olf	Xenopus laevis	Calcium-binding protein p26olf OS=Xenopus laevis OX=8355 GN=s100a11.L PE=1 SV=1 - [Q6I803_XENLA]	9.63	2	2	2	2		0			4.30065	9.63	2	2	218	24.9278	6.11279
Q3B8K8	MGC82659	MGC82659 protein	Xenopus laevis	MGC82659 protein OS=Xenopus laevis OX=8355 GN=MGC82659 PE=1 SV=1 - [Q3B8K8_XENLA]	18.28	7	2	2	2		0			5.3601	18.28	2	2	186	20.9474	6.39209
A0A1L8HTQ5	uchl1.L	Ubiquitin carboxyl-terminal hydrolase	Xenopus laevis	Ubiquitin carboxyl-terminal hydrolase OS=Xenopus laevis OX=8355 GN=uchl1.L PE=1 SV=1 - [A0A1L8HTQ5_XENLA]	8.73	7	1	2	2		0			4.60797	8.73	2	2	252	27.9952	6.0874
A0A1L8H601	XELAEV_18014570mg	WD_REPEATS_REGION domain-containing protein	Xenopus laevis	WD_REPEATS_REGION domain-containing protein OS=Xenopus laevis OX=8355 GN=XELAEV_18014570mg PE=1 SV=1 - [A0A1L8H601_XENLA]	4.8	1	1	1	2		0			5.98669	4.8	1	2	333	35.9998	5.33838
A0A1L8GQZ4	XELAEV_18019975mg	HMA domain-containing protein	Xenopus laevis	HMA domain-containing protein OS=Xenopus laevis OX=8355 GN=XELAEV_18019975mg PE=4 SV=1 - [A0A1L8GQZ4_XENLA]	8.9	1	1	1	3	0	8.9	1	1	4.65087	8.9	1	2	146	15.8772	7.02002
A0A1L8GQL8	XELAEV_18019773mg	Serine/threonine-protein phosphatase	Xenopus laevis	Serine/threonine-protein phosphatase OS=Xenopus laevis OX=8355 GN=XELAEV_18019773mg PE=3 SV=1 - [A0A1L8GQL8_XENLA]	11.56	5	2	2	2		0			4.73088	11.56	2	2	225	26.3099	5.68115
B0JZW4	txndc12.L	Thioredoxin domain-containing protein 12	Xenopus laevis	Thioredoxin domain-containing protein 12 OS=Xenopus laevis OX=8355 GN=txndc12.L PE=1 SV=1 - [B0JZW4_XENLA]	8.33	7	1	1	2		0			4.23729	8.33	1	2	168	18.6543	5.56689
A0A1L8GLH6	CIAPIN1	Anamorsin	Xenopus laevis	Anamorsin OS=Xenopus laevis OX=8355 GN=CIAPIN1 PE=1 SV=1 - [A0A1L8GLH6_XENLA]	9.65	1	2	2	2		0			2.99499	9.65	2	2	311	33.0609	5.17334
A0A1L8GG39	npl.S	Uncharacterized protein	Xenopus laevis	Uncharacterized protein OS=Xenopus laevis OX=8355 GN=npl.S PE=1 SV=1 - [A0A1L8GG39_XENLA]	7.54	1	2	2	2		0			4.77754	7.54	2	2	305	33.7421	6.91748
A0A1L8GCW7	fau.S	40S ribosomal protein S30	Xenopus laevis	40S ribosomal protein S30 OS=Xenopus laevis OX=8355 GN=fau.S PE=3 SV=1 - [A0A1L8GCW7_XENLA]	7.52	3	1	1	2		0			5.18721	7.52	1	2	133	14.5288	10.1694
Q8UWG4	acp1.S	Low molecular weight cytosolic acid phosphatase	Xenopus laevis	Low molecular weight cytosolic acid phosphatase OS=Xenopus laevis OX=8355 GN=acp1.S PE=1 SV=1 - [Q8UWG4_XENLA]	11.95	3	2	2	2		0			3.64636	11.95	2	2	159	17.9347	5.99854
A0A1L8G352	XELAEV_18029427mg	E3 ubiquitin-protein ligase E3D	Xenopus laevis	E3 ubiquitin-protein ligase E3D OS=Xenopus laevis OX=8355 GN=XELAEV_18029427mg PE=1 SV=1 - [A0A1L8G352_XENLA]	5.35	4	2	2	2		0			4.95674	5.35	2	2	411	46.3402	6.81494
Q4FZM5	cyc1.S	MGC116545 protein	Xenopus laevis	MGC116545 protein OS=Xenopus laevis OX=8355 GN=cyc1.S PE=1 SV=1 - [Q4FZM5_XENLA]	7.77	2	1	1	2		0			5.92329	7.77	1	2	309	34.0843	8.5874
A0A1L8FJ42	glrx3.L	Uncharacterized protein	Xenopus laevis	Uncharacterized protein OS=Xenopus laevis OX=8355 GN=glrx3.L PE=1 SV=1 - [A0A1L8FJ42_XENLA]	7.06	9	2	2	2		0			4.15376	7.06	2	2	326	36.5856	5.47803
Q98UJ1	krt55.L	Adult keratin XAK-B	Xenopus laevis	Adult keratin XAK-B OS=Xenopus laevis OX=8355 GN=krt55.L PE=2 SV=1 - [Q98UJ1_XENLA]	3.42	1	1	1	2		0			4.59538	3.42	1	2	497	53.7714	5.46533
A0A1L8ERT3	XELAEV_18043114mg	IF rod domain-containing protein	Xenopus laevis	IF rod domain-containing protein OS=Xenopus laevis OX=8355 GN=XELAEV_18043114mg PE=3 SV=1 - [A0A1L8ERT3_XENLA]	2.19	3	1	1	2		0			4.07994	2.19	1	2	366	41.3273	4.99561
Q6PA56	LOC398959	T-complex protein 1 subunit delta (Fragment)	Xenopus laevis	T-complex protein 1 subunit delta (Fragment) OS=Xenopus laevis OX=8355 GN=LOC398959 PE=2 SV=1 - [Q6PA56_XENLA]	7.57	9	2	2	2		0			5.36692	7.57	2	2	449	48.4609	5.84619
Q7SZ19	LOC398472	Annexin (Fragment)	Xenopus laevis	Annexin (Fragment) OS=Xenopus laevis OX=8355 GN=LOC398472 PE=2 SV=1 - [Q7SZ19_XENLA]	7.23	7	2	2	3	2.04888	4.72	1	1	3.60313	7.23	2	2	318	35.5682	5.21143
B2L4R8	Park7	Maillard deglycase (Fragment)	Xenopus borealis	Maillard deglycase (Fragment) OS=Xenopus borealis OX=8354 GN=Park7 PE=2 SV=1 - [B2L4R8_XENBO]	22.36	7	2	2	2		0			2.92676	22.36	2	2	161	17.1111	7.21045
A0A6I8T246	pls3	Plastin 3	Xenopus tropicalis	Plastin 3 OS=Xenopus tropicalis OX=8364 GN=pls3 PE=4 SV=2 - [A0A6I8T246_XENTR]	4.42	6	2	2	2		0			5.54951	4.42	2	2	611	68.8912	5.75732
F6R7N1	flna	Filamin A	Xenopus tropicalis	Filamin A OS=Xenopus tropicalis OX=8364 GN=flna PE=3 SV=4 - [F6R7N1_XENTR]	1.23	7	2	2	2		0			4.33035	1.23	2	2	2517	267.522	5.85889
A0A6I8R6C1	cand1	Cullin-associated and neddylation-dissociated 1	Xenopus tropicalis	Cullin-associated and neddylation-dissociated 1 OS=Xenopus tropicalis OX=8364 GN=cand1 PE=3 SV=1 - [A0A6I8R6C1_XENTR]	2.21	7	2	2	2		0			1.94847	2.21	2	2	1219	134.72	5.79541
A0A6I8RZF9	rps26	40S ribosomal protein S26	Xenopus tropicalis	40S ribosomal protein S26 OS=Xenopus tropicalis OX=8364 GN=rps26 PE=3 SV=1 - [A0A6I8RZF9_XENTR]	21.24	4	2	2	2		0			5.87734	21.24	2	2	113	12.934	10.8579
A0A6I8SUK2	Ig-like domain-containing protein OS=Xenopus tropicalis OX=8364	Ig-like domain-containing protein	Xenopus tropicalis	Ig-like domain-containing protein OS=Xenopus tropicalis OX=8364 PE=4 SV=2 - [A0A6I8SUK2_XENTR]	7.83	3	1	1	2		0			5.08287	7.83	1	2	115	12.387	4.71631
A2BDB5	LOC100037090	LOC100037090 protein (Fragment)	Xenopus laevis	LOC100037090 protein (Fragment) OS=Xenopus laevis OX=8355 GN=LOC100037090 PE=2 SV=1 - [A2BDB5_XENLA]	8.3	3	2	2	2					3.90974	8.3	2	2	277	29.8781	6.66846
Q3B8B3	uchl1.S	Ubiquitin carboxyl-terminal hydrolase	Xenopus laevis	Ubiquitin carboxyl-terminal hydrolase OS=Xenopus laevis OX=8355 GN=uchl1.S PE=2 SV=1 - [Q3B8B3_XENLA]	9.87	8	1	2	2					4.15509	9.87	2	2	223	24.8416	5.99854
Q6IRP7	atp5pd.L	ATP synthase subunit d, mitochondrial	Xenopus laevis	ATP synthase subunit d, mitochondrial OS=Xenopus laevis OX=8355 GN=atp5pd.L PE=1 SV=1 - [Q6IRP7_XENLA]	12.42	2	2	2	2					4.44415	12.42	2	2	161	18.7106	7.48877
A0A1L8EUH3	jpt1.L	Uncharacterized protein	Xenopus laevis	Uncharacterized protein OS=Xenopus laevis OX=8355 GN=jpt1.L PE=3 SV=1 - [A0A1L8EUH3_XENLA]	15.28	1	1	1	2					4.83249	15.28	1	2	144	14.7848	4.70361
Q5U555	ndufs3.L	Complex I-30kD	Xenopus laevis	Complex I-30kD OS=Xenopus laevis OX=8355 GN=ndufs3.L PE=2 SV=1 - [Q5U555_XENLA]	5.6	2	1	1	2					4.77278	5.6	1	2	250	28.5676	6.15088
Q6IRP1	grx5-prov	Grx5-prov protein (Fragment)	Xenopus laevis	Grx5-prov protein (Fragment) OS=Xenopus laevis OX=8355 GN=grx5-prov PE=2 SV=1 - [Q6IRP1_XENLA]	8.67	5	2	2	2					5.07571	8.67	2	2	150	16.6315	7.89893
F7B4W6	myl3	Myosin light chain 3	Xenopus tropicalis	Myosin light chain 3 OS=Xenopus tropicalis OX=8364 GN=myl3 PE=4 SV=3 - [F7B4W6_XENTR]	7.43	8	1	1	2					4.0269	7.43	1	2	175	19.742	5.03369
F7BWX1	rpe	Ribulose-phosphate 3-epimerase	Xenopus tropicalis	Ribulose-phosphate 3-epimerase OS=Xenopus tropicalis OX=8364 GN=rpe PE=2 SV=3 - [F7BWX1_XENTR]	9.21	2	1	1	2					5.92464	9.21	1	2	228	24.9692	5.80811
A0A1L8GDJ8	fen1.S	Flap endonuclease 1	Xenopus laevis	Flap endonuclease 1 OS=Xenopus laevis OX=8355 GN=fen1.S PE=1 SV=1 - [A0A1L8GDJ8_XENLA]	4.19	3	1	1	1		0			2.7178	4.19	1	1	382	42.8382	7.92822
A0A1L8FDB9	selenbp1.L	Methanethiol oxidase	Xenopus laevis	Methanethiol oxidase OS=Xenopus laevis OX=8355 GN=selenbp1.L PE=3 SV=1 - [A0A1L8FDB9_XENLA]	2.33	1	1	1	1		0			1.70092	2.33	1	1	472	52.5803	5.92236
A0A1L8ELM9	rps21.S	40S ribosomal protein S21	Xenopus laevis	40S ribosomal protein S21 OS=Xenopus laevis OX=8355 GN=rps21.S PE=1 SV=1 - [A0A1L8ELM9_XENLA]	12.05	3	1	1	1		0			1.73014	12.05	1	1	83	9.2086	8.48486
A0A1L8GT74	pclaf.S	PCNA-associated factor	Xenopus laevis	PCNA-associated factor OS=Xenopus laevis OX=8355 GN=pclaf.S PE=4 SV=1 - [A0A1L8GT74_XENLA]	13.01	1	1	1	1		0			3.21158	13.01	1	1	123	12.7641	8.6167
A0A1L8GFD4	wls.S	Uncharacterized protein	Xenopus laevis	Uncharacterized protein OS=Xenopus laevis OX=8355 GN=wls.S PE=1 SV=1 - [A0A1L8GFD4_XENLA]	2.03	2	1	1	1		0			2.37072	2.03	1	1	541	61.8703	6.82959
A0A1L8HN70	gamt.S	Guanidinoacetate N-methyltransferase	Xenopus laevis	Guanidinoacetate N-methyltransferase OS=Xenopus laevis OX=8355 GN=gamt.S PE=3 SV=1 - [A0A1L8HN70_XENLA]	13.73	1	1	2	5	11.347	6.87	1	4	2.24531	6.87	1	1	233	26.6442	5.60498
A9ULY4	RNA helicase (Fragment) OS=Xenopus laevis OX=8355	RNA helicase (Fragment)	Xenopus laevis	RNA helicase (Fragment) OS=Xenopus laevis OX=8355 PE=2 SV=1 - [A9ULY4_XENLA]	1.96	11	1	1	1		0			2.06758	1.96	1	1	460	51.5062	7.1958
A0AUU3	cox7a2.L	Cox7a2b protein	Xenopus laevis	Cox7a2b protein OS=Xenopus laevis OX=8355 GN=cox7a2.L PE=2 SV=1 - [A0AUU3_XENLA]	12.05	3	1	1	1		0			0	12.05	1	1	83	9.35213	10.228
Q05AV8	echs1.L	LOC733431 protein	Xenopus laevis	LOC733431 protein OS=Xenopus laevis OX=8355 GN=echs1.L PE=2 SV=1 - [Q05AV8_XENLA]	4	5	1	1	1		0			0	4	1	1	175	19.2481	8.85107
Q5I003	ndufs7.S	Complex I-20kD	Xenopus laevis	Complex I-20kD OS=Xenopus laevis OX=8355 GN=ndufs7.S PE=2 SV=1 - [Q5I003_XENLA]	5	7	1	1	1		0			2.25745	5	1	1	180	20.4494	9.68604
Q5U511	vapb.S	LOC495400 protein	Xenopus laevis	LOC495400 protein OS=Xenopus laevis OX=8355 GN=vapb.S PE=2 SV=1 - [Q5U511_XENLA]	5.76	3	1	1	1		0			2.25173	5.76	1	1	243	27.3341	7.32764
Q66J53	acadm.S	Medium-chain specific acyl-CoA dehydrogenase, mitochondrial	Xenopus laevis	Medium-chain specific acyl-CoA dehydrogenase, mitochondrial OS=Xenopus laevis OX=8355 GN=acadm.S PE=2 SV=1 - [Q66J53_XENLA]	1.9	4	1	1	1		0			2.09301	1.9	1	1	422	46.1984	8.33838
Q6AZI4	LOC446231	LOC446231 protein (Fragment)	Xenopus laevis	LOC446231 protein (Fragment) OS=Xenopus laevis OX=8355 GN=LOC446231 PE=2 SV=1 - [Q6AZI4_XENLA]	5.88	5	1	1	1		0			2.59901	5.88	1	1	153	17.7032	8.66064
Q6AZI9	prps1.L	Ribose-phosphate diphosphokinase	Xenopus laevis	Ribose-phosphate diphosphokinase OS=Xenopus laevis OX=8355 GN=prps1.L PE=1 SV=1 - [Q6AZI9_XENLA]	9.43	6	2	2	2	2.09963	5.35	1	1	2.01726	4.09	1	1	318	34.807	6.96143
Q6DDN9	cbs.S	Cystathionine beta-synthase	Xenopus laevis	Cystathionine beta-synthase OS=Xenopus laevis OX=8355 GN=cbs.S PE=2 SV=1 - [Q6DDN9_XENLA]	2.31	3	1	1	1		0			2.84627	2.31	1	1	562	62.0459	6.66846
Q6DEB3	phb2.S	Prohibitin	Xenopus laevis	Prohibitin OS=Xenopus laevis OX=8355 GN=phb2.S PE=2 SV=1 - [Q6DEB3_XENLA]	3.99	1	1	1	1		0			2.54381	3.99	1	1	301	33.3339	9.90576
Q6DCS3	bco2.L	Bcdo2-prov protein	Xenopus laevis	Bcdo2-prov protein OS=Xenopus laevis OX=8355 GN=bco2.L PE=2 SV=1 - [Q6DCS3_XENLA]	1.65	2	1	1	1		0			1.89966	1.65	1	1	485	54.8293	6.7124
Q6DKB9	aco2.S	Aconitate hydratase, mitochondrial	Xenopus laevis	Aconitate hydratase, mitochondrial OS=Xenopus laevis OX=8355 GN=aco2.S PE=2 SV=1 - [Q6DKB9_XENLA]	3.84	1	1	1	1		0			2.27767	3.84	1	1	782	85.2216	7.12256
Q6GNH9	prdx4.L	MGC82793 protein	Xenopus laevis	MGC82793 protein OS=Xenopus laevis OX=8355 GN=prdx4.L PE=2 SV=1 - [Q6GNH9_XENLA]	3	6	1	1	1		0			2.02445	3	1	1	267	29.7922	6.72705
Q6INS0	gstt1.L	Glutathione transferase	Xenopus laevis	Glutathione transferase OS=Xenopus laevis OX=8355 GN=gstt1.L PE=2 SV=1 - [Q6INS0_XENLA]	3.72	1	1	1	1		0			0	3.72	1	1	242	27.6362	6.55127
Q6IRA2	XTm4	XTm4 protein	Xenopus laevis	XTm4 protein OS=Xenopus laevis OX=8355 GN=XTm4 PE=2 SV=1 - [Q6IRA2_XENLA]	4.61	37	1	1	1		0			1.67964	4.61	1	1	152	17.5601	4.90674
Q7ZWW5	abcf2.L	Abcf2-prov protein	Xenopus laevis	Abcf2-prov protein OS=Xenopus laevis OX=8355 GN=abcf2.L PE=2 SV=1 - [Q7ZWW5_XENLA]	2.31	2	1	1	1		0			2.0393	2.31	1	1	607	69.0693	7.07861
Q8AVS3	LOC398427	Annexin (Fragment)	Xenopus laevis	Annexin (Fragment) OS=Xenopus laevis OX=8355 GN=LOC398427 PE=2 SV=1 - [Q8AVS3_XENLA]	6.25	6	1	1	1		0			2.91584	6.25	1	1	256	28.3586	6.39209
Q3B8H9	fech.L	Ferrochelatase	Xenopus laevis	Ferrochelatase OS=Xenopus laevis OX=8355 GN=fech.L PE=1 SV=1 - [Q3B8H9_XENLA]	3.83	2	1	1	1		0			2.51351	3.83	1	1	418	46.8191	9.15869
A0A1L8I3S6	XELAEV_18008548mg	Transitional endoplasmic reticulum ATPase	Xenopus laevis	Transitional endoplasmic reticulum ATPase OS=Xenopus laevis OX=8355 GN=XELAEV_18008548mg PE=1 SV=1 - [A0A1L8I3S6_XENLA]	1.61	3	1	1	1		0			2.45141	1.61	1	1	746	82.5771	5.21143
A0A1L8HWF1	XELAEV_18006153mg	Uncharacterized protein	Xenopus laevis	Uncharacterized protein OS=Xenopus laevis OX=8355 GN=XELAEV_18006153mg PE=3 SV=1 - [A0A1L8HWF1_XENLA]	7.69	6	1	1	1		0			2.36257	7.69	1	1	117	13.2782	10.3159
A0A1L8HSZ6	XELAEV_18004968mg	Ig-like domain-containing protein	Xenopus laevis	Ig-like domain-containing protein OS=Xenopus laevis OX=8355 GN=XELAEV_18004968mg PE=4 SV=1 - [A0A1L8HSZ6_XENLA]	9.32	1	1	1	1		0			0	9.32	1	1	161	17.7016	8.17725
A0A1L8HRD1	XELAEV_18010883mg	Beta-hexosaminidase	Xenopus laevis	Beta-hexosaminidase OS=Xenopus laevis OX=8355 GN=XELAEV_18010883mg PE=3 SV=1 - [A0A1L8HRD1_XENLA]	3.09	4	1	1	1		0			3.11568	3.09	1	1	517	58.7854	6.78564
A0A1L8HQ95	XELAEV_18010493mg	CN hydrolase domain-containing protein	Xenopus laevis	CN hydrolase domain-containing protein OS=Xenopus laevis OX=8355 GN=XELAEV_18010493mg PE=1 SV=1 - [A0A1L8HQ95_XENLA]	4.7	2	1	1	1		0			3.49859	4.7	1	1	383	43.1363	6.53662
A0A1L8HP68	anxa1.2.S	Annexin	Xenopus laevis	Annexin OS=Xenopus laevis OX=8355 GN=anxa1.2.S PE=3 SV=1 - [A0A1L8HP68_XENLA]	4.73	2	1	1	1		0			2.41185	4.73	1	1	338	37.6115	7.34229
A0A1L8HL04	XELAEV_18008998mg	UDP-glucose 6-dehydrogenase	Xenopus laevis	UDP-glucose 6-dehydrogenase OS=Xenopus laevis OX=8355 GN=XELAEV_18008998mg PE=3 SV=1 - [A0A1L8HL04_XENLA]	2.91	8	1	1	1		0			2.36745	2.91	1	1	446	50.1257	7.15186
A0A1L8HFR9	ak2.L	Adenylate kinase 2, mitochondrial	Xenopus laevis	Adenylate kinase 2, mitochondrial OS=Xenopus laevis OX=8355 GN=ak2.L PE=3 SV=1 - [A0A1L8HFR9_XENLA]	5.11	3	1	1	1		0			2.8834	5.11	1	1	235	25.9243	6.94678
A0A1L8HEC8	XELAEV_18012118mg	Uncharacterized protein	Xenopus laevis	Uncharacterized protein OS=Xenopus laevis OX=8355 GN=XELAEV_18012118mg PE=4 SV=1 - [A0A1L8HEC8_XENLA]	9.43	4	1	1	1		0			1.93791	9.43	1	1	106	11.8098	9.27588
A0A1L8H8W5	XELAEV_18015541mg	Uncharacterized protein	Xenopus laevis	Uncharacterized protein OS=Xenopus laevis OX=8355 GN=XELAEV_18015541mg PE=4 SV=1 - [A0A1L8H8W5_XENLA]	21.33	1	1	1	1		0			0	21.33	1	1	75	8.51846	9.72998
A0A1L8H584	atp5pf.S	ATP synthase-coupling factor 6, mitochondrial	Xenopus laevis	ATP synthase-coupling factor 6, mitochondrial OS=Xenopus laevis OX=8355 GN=atp5pf.S PE=3 SV=1 - [A0A1L8H584_XENLA]	12.15	2	1	1	1		0			0	12.15	1	1	107	12.3724	9.20264
A0A1L8H048	pclaf.L	PCNA-associated factor	Xenopus laevis	PCNA-associated factor OS=Xenopus laevis OX=8355 GN=pclaf.L PE=1 SV=1 - [A0A1L8H048_XENLA]	12.5	1	1	1	1		0			2.86366	12.5	1	1	128	13.2395	9.0415
A0A1L8GZH2	XELAEV_18017867mg	Uncharacterized protein	Xenopus laevis	Uncharacterized protein OS=Xenopus laevis OX=8355 GN=XELAEV_18017867mg PE=4 SV=1 - [A0A1L8GZH2_XENLA]	1.66	1	1	1	1		0			4.18031	1.66	1	1	2044	229.562	6.66846
A0A1L8GWU8	XELAEV_18016934mg	75 kDa glucose-regulated protein	Xenopus laevis	75 kDa glucose-regulated protein OS=Xenopus laevis OX=8355 GN=XELAEV_18016934mg PE=1 SV=1 - [A0A1L8GWU8_XENLA]	3.91	7	2	2	2	0	1.8	1	1	1.7802	2.11	1	1	665	71.9329	5.92236
A0A1L8GS39	XELAEV_18020353mg	Annexin	Xenopus laevis	Annexin OS=Xenopus laevis OX=8355 GN=XELAEV_18020353mg PE=3 SV=1 - [A0A1L8GS39_XENLA]	5.3	2	1	1	1		0			2.16741	5.3	1	1	321	35.9534	8.20654
A0A1L8GPS7	XELAEV_18023999mg	Dolichyl-diphosphooligosaccharide--protein glycosyltransferase subunit 1	Xenopus laevis	Dolichyl-diphosphooligosaccharide--protein glycosyltransferase subunit 1 OS=Xenopus laevis OX=8355 GN=XELAEV_18023999mg PE=1 SV=1 - [A0A1L8GPS7_XENLA]	1.68	5	1	1	1		0			0	1.68	1	1	595	67.1777	6.58057
A0A1L8GPL1	XELAEV_18023965mg	Imidazolonepropionate hydrolase	Xenopus laevis	Imidazolonepropionate hydrolase OS=Xenopus laevis OX=8355 GN=XELAEV_18023965mg PE=1 SV=1 - [A0A1L8GPL1_XENLA]	1.48	2	1	1	1		0			1.86162	1.48	1	1	677	74.6852	6.60986
A0A1L8GMQ8	XELAEV_18023300mg	Holocytochrome c-type synthase	Xenopus laevis	Holocytochrome c-type synthase OS=Xenopus laevis OX=8355 GN=XELAEV_18023300mg PE=3 SV=1 - [A0A1L8GMQ8_XENLA]	5.32	2	1	1	1		0			0	5.32	1	1	301	34.1291	6.91748
A0A1L8GM46	XELAEV_18023070mg	TPR_REGION domain-containing protein	Xenopus laevis	TPR_REGION domain-containing protein OS=Xenopus laevis OX=8355 GN=XELAEV_18023070mg PE=1 SV=1 - [A0A1L8GM46_XENLA]	2.54	2	1	1	1		0			2.50304	2.54	1	1	591	64.9851	4.55127
A0A1L8GLG8	XELAEV_18022830mg	Aspartate aminotransferase	Xenopus laevis	Aspartate aminotransferase OS=Xenopus laevis OX=8355 GN=XELAEV_18022830mg PE=1 SV=1 - [A0A1L8GLG8_XENLA]	1.87	2	1	1	1		0			1.84195	1.87	1	1	427	47.5543	8.83643
A0A1L8GJR1	XELAEV_18022223mg	Ubiquitin thioesterase	Xenopus laevis	Ubiquitin thioesterase OS=Xenopus laevis OX=8355 GN=XELAEV_18022223mg PE=3 SV=1 - [A0A1L8GJR1_XENLA]	5.6	4	1	1	1		0			0	5.6	1	1	268	30.8073	5.21143
A0A1L8GB64	XELAEV_18027896mg	Coatomer subunit beta'	Xenopus laevis	Coatomer subunit beta' OS=Xenopus laevis OX=8355 GN=XELAEV_18027896mg PE=1 SV=1 - [A0A1L8GB64_XENLA]	2.02	1	1	1	1		0			3.41972	2.02	1	1	891	99.992	5.13525
A0A1L8GAQ2	XELAEV_18027752mg	Uncharacterized protein	Xenopus laevis	Uncharacterized protein OS=Xenopus laevis OX=8355 GN=XELAEV_18027752mg PE=1 SV=1 - [A0A1L8GAQ2_XENLA]	7.95	5	2	2	2	1.78608	3.67	1	1	2.76267	4.28	1	1	327	36.8432	5.43994
A0A1L8G931	XELAEV_18027219mg	PKS_ER domain-containing protein	Xenopus laevis	PKS_ER domain-containing protein OS=Xenopus laevis OX=8355 GN=XELAEV_18027219mg PE=1 SV=1 - [A0A1L8G931_XENLA]	2.24	2	1	1	1		0			1.90631	2.24	1	1	401	43.8378	9.21729
A0A1L8G711	mrpl14.L	Uncharacterized protein	Xenopus laevis	Uncharacterized protein OS=Xenopus laevis OX=8355 GN=mrpl14.L PE=1 SV=1 - [A0A1L8G711_XENLA]	13.01	1	1	1	1		0			2.46009	13.01	1	1	146	15.7185	10.2427
A0A1L8G5V2	XELAEV_18026130mg	Uncharacterized protein	Xenopus laevis	Uncharacterized protein OS=Xenopus laevis OX=8355 GN=XELAEV_18026130mg PE=4 SV=1 - [A0A1L8G5V2_XENLA]	4.42	1	1	1	1		0			2.14329	4.42	1	1	249	28.2653	9.87646
A0A1L8G599	mtmr9.S	Myotubularin phosphatase domain-containing protein	Xenopus laevis	Myotubularin phosphatase domain-containing protein OS=Xenopus laevis OX=8355 GN=mtmr9.S PE=3 SV=1 - [A0A1L8G599_XENLA]	4.01	1	1	1	1		0			2.456	4.01	1	1	549	63.237	6.44287
A0A1L8G4S4	XELAEV_18029906mg	WD_REPEATS_REGION domain-containing protein	Xenopus laevis	WD_REPEATS_REGION domain-containing protein OS=Xenopus laevis OX=8355 GN=XELAEV_18029906mg PE=3 SV=1 - [A0A1L8G4S4_XENLA]	1.93	3	1	1	1		0			0	1.93	1	1	622	69.834	6.55127
A0A1L8FQC7	iba57.S	Uncharacterized protein	Xenopus laevis	Uncharacterized protein OS=Xenopus laevis OX=8355 GN=iba57.S PE=1 SV=1 - [A0A1L8FQC7_XENLA]	3.13	1	1	1	1		0			1.98346	3.13	1	1	319	35.0273	8.23584
A0A1L8FLJ6	XELAEV_18035433mg	ATP synthase subunit	Xenopus laevis	ATP synthase subunit OS=Xenopus laevis OX=8355 GN=XELAEV_18035433mg PE=3 SV=1 - [A0A1L8FLJ6_XENLA]	12.15	2	1	1	1		0			2.63528	12.15	1	1	107	11.6913	9.92041
A0A1L8FEV4	XELAEV_18037032mg	Uncharacterized protein	Xenopus laevis	Uncharacterized protein OS=Xenopus laevis OX=8355 GN=XELAEV_18037032mg PE=4 SV=1 - [A0A1L8FEV4_XENLA]	2.02	1	1	1	1		0			0	2.02	1	1	495	57.6252	6.49365
A0A1L8FDW8	XELAEV_18036685mg	Uncharacterized protein	Xenopus laevis	Uncharacterized protein OS=Xenopus laevis OX=8355 GN=XELAEV_18036685mg PE=3 SV=1 - [A0A1L8FDW8_XENLA]	1.39	8	1	1	1		0			2.16357	1.39	1	1	1364	152.545	6.63916
A0A1L8FA11	XELAEV_18039722mg	Creatine kinase	Xenopus laevis	Creatine kinase OS=Xenopus laevis OX=8355 GN=XELAEV_18039722mg PE=1 SV=1 - [A0A1L8FA11_XENLA]	3.19	3	1	1	1		0			1.73155	3.19	1	1	282	31.7626	6.04932
A0A1L8EVI2	XELAEV_18044446mg	Uncharacterized protein	Xenopus laevis	Uncharacterized protein OS=Xenopus laevis OX=8355 GN=XELAEV_18044446mg PE=4 SV=1 - [A0A1L8EVI2_XENLA]	4.11	5	1	1	1		0			1.96039	4.11	1	1	341	39.1457	6.23975
A0A1L8ERX1	XELAEV_18043113mg	IF rod domain-containing protein	Xenopus laevis	IF rod domain-containing protein OS=Xenopus laevis OX=8355 GN=XELAEV_18043113mg PE=4 SV=1 - [A0A1L8ERX1_XENLA]	4.31	3	1	1	4	4.07668	4.31	1	3	0	4.31	1	1	441	47.7141	5.19873
A0A1L8EPX4	idh1.S	Isocitrate dehydrogenase [NADP]	Xenopus laevis	Isocitrate dehydrogenase [NADP] OS=Xenopus laevis OX=8355 GN=idh1.S PE=3 SV=1 - [A0A1L8EPX4_XENLA]	3.13	3	1	1	1		0			0	3.13	1	1	415	46.8784	6.12549
A0A1L8EPM7	XELAEV_18047295mg	5-aminoimidazole-4-carboxamide ribonucleotide formyltransferase	Xenopus laevis	5-aminoimidazole-4-carboxamide ribonucleotide formyltransferase OS=Xenopus laevis OX=8355 GN=XELAEV_18047295mg PE=1 SV=1 - [A0A1L8EPM7_XENLA]	1.5	3	1	1	1		0			2.00519	1.5	1	1	532	57.9958	7.26904
A0JPG5	LOC100036792	MICOS complex subunit MIC60 (Fragment)	Xenopus laevis	MICOS complex subunit MIC60 (Fragment) OS=Xenopus laevis OX=8355 GN=LOC100036792 PE=2 SV=1 - [A0JPG5_XENLA]	2.02	3	1	1	1		0			2.09216	2.02	1	1	495	54.5275	6.32861
A5PKP3	gart.L	Glycinamide ribonucleotide synthetase	Xenopus laevis	Glycinamide ribonucleotide synthetase OS=Xenopus laevis OX=8355 GN=gart.L PE=2 SV=1 - [A5PKP3_XENLA]	2.95	2	1	1	1		0			0	2.95	1	1	440	46.2409	5.92236
Q4FZQ3	rpl34	60S ribosomal protein L34	Xenopus laevis	60S ribosomal protein L34 OS=Xenopus laevis OX=8355 GN=rpl34 PE=2 SV=1 - [Q4FZQ3_XENLA]	7.69	3	1	1	1		0			0	7.69	1	1	117	13.2535	11.4731
Q6GR67	LOC397932	LOC397932 protein	Xenopus laevis	LOC397932 protein OS=Xenopus laevis OX=8355 GN=LOC397932 PE=2 SV=1 - [Q6GR67_XENLA]	7.05	8	1	1	1		0			2.32898	7.05	1	1	156	18.2301	5.12256
P70071	nme2.L	Nucleoside diphosphate kinase	Xenopus laevis	Nucleoside diphosphate kinase OS=Xenopus laevis OX=8355 GN=nme2.L PE=2 SV=1 - [P70071_XENLA]	11.04	3	1	1	1		0			2.40969	11.04	1	1	154	17.4599	6.56592
B9VQ38	Telophase disc 60 kDa protein (Fragment) OS=Xenopus laevis OX=8355	Telophase disc 60 kDa protein (Fragment)	Xenopus laevis	Telophase disc 60 kDa protein (Fragment) OS=Xenopus laevis OX=8355 PE=2 SV=1 - [B9VQ38_XENLA]	2.82	4	1	1	1		0			3.01945	2.82	1	1	497	53.4799	8.79248
A0A1B8XTE4	XENTR_v90028707mg	IGv domain-containing protein	Xenopus tropicalis	IGv domain-containing protein OS=Xenopus tropicalis OX=8364 GN=XENTR_v90028707mg PE=4 SV=1 - [A0A1B8XTE4_XENTR]	9.47	10	1	1	1		0			2.28716	9.47	1	1	95	10.6834	9.51025
Q28J74	atp5po	ATP synthase subunit O, mitochondrial	Xenopus tropicalis	ATP synthase subunit O, mitochondrial OS=Xenopus tropicalis OX=8364 GN=atp5po PE=2 SV=1 - [Q28J74_XENTR]	6.64	3	1	1	1		0			2.07657	6.64	1	1	211	22.7955	9.81787
Q6DIG6	ppp2r1b	Platelet-derived growth factor beta polypeptide (Simian sarcoma viral (V-sis) oncogene homolog)	Xenopus tropicalis	Platelet-derived growth factor beta polypeptide (Simian sarcoma viral (V-sis) oncogene homolog) OS=Xenopus tropicalis OX=8364 GN=ppp2r1b PE=2 SV=1 - [Q6DIG6_XENTR]	1.7	6	1	1	1		0			1.97905	1.7	1	1	589	65.3881	5.04639
F6X9W9	taf15	TATA-box binding protein associated factor 15	Xenopus tropicalis	TATA-box binding protein associated factor 15 OS=Xenopus tropicalis OX=8364 GN=taf15 PE=3 SV=4 - [F6X9W9_XENTR]	5.54	4	1	2	2	2.02769	2.46	1	1	0	3.08	1	1	487	51.7396	8.74854
A0A6I8SAZ1	carm1	Coactivator-associated arginine methyltransferase 1	Xenopus tropicalis	Coactivator-associated arginine methyltransferase 1 OS=Xenopus tropicalis OX=8364 GN=carm1 PE=4 SV=2 - [A0A6I8SAZ1_XENTR]	2.27	5	1	1	1		0			1.66906	2.27	1	1	572	62.5117	6.48096
A0A7D9NJR0	tuba1c	Peptidylprolyl isomerase domain and WD repeat-containing 1	Xenopus tropicalis	Peptidylprolyl isomerase domain and WD repeat-containing 1 OS=Xenopus tropicalis OX=8364 GN=tuba1c PE=4 SV=2 - [A0A7D9NJR0_XENTR]	2.61	3	1	1	1		0			2.018	2.61	1	1	612	69.3409	8.54346
A0A6I8SDW2	jup	Junction plakoglobin	Xenopus tropicalis	Junction plakoglobin OS=Xenopus tropicalis OX=8364 GN=jup PE=3 SV=2 - [A0A6I8SDW2_XENTR]	1.05	6	1	1	1		0			1.64364	1.05	1	1	669	73.7838	6.41748
A0A6I8S1W2	pdha1	Pyruvate dehydrogenase E1 component subunit alpha	Xenopus tropicalis	Pyruvate dehydrogenase E1 component subunit alpha OS=Xenopus tropicalis OX=8364 GN=pdha1 PE=4 SV=2 - [A0A6I8S1W2_XENTR]	2.23	11	1	1	1		0			1.66345	2.23	1	1	358	40.0067	6.60986
F6V5P5	ndufa13	Annexin	Xenopus tropicalis	Annexin OS=Xenopus tropicalis OX=8364 GN=ndufa13 PE=3 SV=4 - [F6V5P5_XENTR]	7.09	6	1	1	1		0			2.0683	7.09	1	1	141	16.4897	9.72998
A0A6I8SC88	ube2n	Ubiquitin-conjugating enzyme E2 N	Xenopus tropicalis	Ubiquitin-conjugating enzyme E2 N OS=Xenopus tropicalis OX=8364 GN=ube2n PE=4 SV=1 - [A0A6I8SC88_XENTR]	7.38	7	1	1	1		0			2.34148	7.38	1	1	149	16.9218	5.5542
A9JSN0	LOC100127764	Complex I-13kD-A (Fragment)	Xenopus tropicalis	Complex I-13kD-A (Fragment) OS=Xenopus tropicalis OX=8364 GN=LOC100127764 PE=2 SV=1 - [A9JSN0_XENTR]	12.5	4	1	1	1		0			0	12.5	1	1	120	13.4887	8.93896
A0A6I8RV71	ndufs8	Complex I-23kD	Xenopus tropicalis	Complex I-23kD OS=Xenopus tropicalis OX=8364 GN=ndufs8 PE=3 SV=1 - [A0A6I8RV71_XENTR]	3.61	6	1	1	1		0			1.70269	3.61	1	1	194	22.284	5.65576
A0A6I8QBE0	hsd17b4	Hydroxysteroid (17-beta) dehydrogenase 4	Xenopus tropicalis	Hydroxysteroid (17-beta) dehydrogenase 4 OS=Xenopus tropicalis OX=8364 GN=hsd17b4 PE=4 SV=2 - [A0A6I8QBE0_XENTR]	1.85	5	1	1	1		0			2.85673	1.85	1	1	704	76.6182	7.26904
A0A6I8RWV6	ndufv1	NADH dehydrogenase [ubiquinone] flavoprotein 1, mitochondrial	Xenopus tropicalis	NADH dehydrogenase [ubiquinone] flavoprotein 1, mitochondrial OS=Xenopus tropicalis OX=8364 GN=ndufv1 PE=3 SV=2 - [A0A6I8RWV6_XENTR]	3.41	7	1	1	1		0			2.36057	3.41	1	1	440	47.9675	8.76318
F7BQF6	aldh7a1	Aldehyde dehydrogenase (NAD(+))	Xenopus tropicalis	Aldehyde dehydrogenase (NAD(+)) OS=Xenopus tropicalis OX=8364 GN=aldh7a1 PE=3 SV=4 - [F7BQF6_XENTR]	2.24	7	1	1	1		0			0	2.24	1	1	490	52.9482	6.02393
A0A6I8RBX3	fam120c	Family with sequence similarity 120C	Xenopus tropicalis	Family with sequence similarity 120C OS=Xenopus tropicalis OX=8364 GN=fam120c PE=3 SV=1 - [A0A6I8RBX3_XENTR]	0.77	1	1	1	1		0			2.0038	0.77	1	1	1040	114.493	8.54346
A0A6I8SYN3	ndufa9	NADH:ubiquinone oxidoreductase subunit A9	Xenopus tropicalis	NADH:ubiquinone oxidoreductase subunit A9 OS=Xenopus tropicalis OX=8364 GN=ndufa9 PE=4 SV=2 - [A0A6I8SYN3_XENTR]	3.77	4	1	1	1		0			1.82554	3.77	1	1	371	42.4582	9.29053
A0A1B8XYE1	XENTR_v90029423mg	Uncharacterized protein	Xenopus tropicalis	Uncharacterized protein OS=Xenopus tropicalis OX=8364 GN=XENTR_v90029423mg PE=4 SV=1 - [A0A1B8XYE1_XENTR]	0.33	2	1	1	1		0			2.77102	0.33	1	1	5725	644.466	5.93506
A0A1B8XVR4	XENTR_v900259333mg	Uncharacterized protein (Fragment)	Xenopus tropicalis	Uncharacterized protein (Fragment) OS=Xenopus tropicalis OX=8364 GN=XENTR_v900259333mg PE=3 SV=1 - [A0A1B8XVR4_XENTR]	4.09	6	1	1	1		0			0	4.09	1	1	318	34.9686	7.98682
A0A6I8RB27	cndp2	CNDP dipeptidase 2 (metallopeptidase M20 family)	Xenopus tropicalis	CNDP dipeptidase 2 (metallopeptidase M20 family) OS=Xenopus tropicalis OX=8364 GN=cndp2 PE=3 SV=1 - [A0A6I8RB27_XENTR]	3.22	6	1	1	1		0			2.12761	3.22	1	1	466	51.5652	5.50342
A0A6I8R3Z4	c3	Complement C3	Xenopus tropicalis	Complement C3 OS=Xenopus tropicalis OX=8364 GN=c3 PE=4 SV=2 - [A0A6I8R3Z4_XENTR]	0.78	14	1	1	1		0			2.62126	0.78	1	1	1538	172.111	7.38623
A0A6I8SHZ8	dlgap3	Discs, large homolog-associated protein 3	Xenopus tropicalis	Discs, large homolog-associated protein 3 OS=Xenopus tropicalis OX=8364 GN=dlgap3 PE=3 SV=2 - [A0A6I8SHZ8_XENTR]	2.44	3	1	1	1		0			0	2.44	1	1	901	100.027	8.44092
A0A6I8S2P1	p4hb	Protein disulfide-isomerase	Xenopus tropicalis	Protein disulfide-isomerase OS=Xenopus tropicalis OX=8364 GN=p4hb PE=3 SV=1 - [A0A6I8S2P1_XENTR]	2.13	7	1	1	1		0			0	2.13	1	1	469	52.16	4.81787
F6UFL5	dnajc25	DnaJ homolog subfamily C member 25	Xenopus tropicalis	DnaJ homolog subfamily C member 25 OS=Xenopus tropicalis OX=8364 GN=dnajc25 PE=3 SV=2 - [F6UFL5_XENTR]	3.75	5	1	1	1		0			0	3.75	1	1	267	29.5654	9.75928
A0A803KCU2	Uncharacterized protein OS=Xenopus tropicalis OX=8364	Uncharacterized protein	Xenopus tropicalis	Uncharacterized protein OS=Xenopus tropicalis OX=8364 PE=4 SV=1 - [A0A803KCU2_XENTR]	1.82	7	1	1	1		0			2.64688	1.82	1	1	713	80.2081	7.00537
A0A803JJW9	paics.1	Phosphoribosylaminoimidazole carboxylase; phosphoribosylaminoimidazolesuccinocarboxamide synthase	Xenopus tropicalis	Phosphoribosylaminoimidazole carboxylase; phosphoribosylaminoimidazolesuccinocarboxamide synthase OS=Xenopus tropicalis OX=8364 GN=paics.1 PE=4 SV=1 - [A0A803JJW9_XENTR]	3.65	11	1	1	1		0			2.53916	3.65	1	1	384	42.8486	6.84424
Q5M8W7	LOC496671	2-iminobutanoate/2-iminopropanoate deaminase (Fragment)	Xenopus tropicalis	2-iminobutanoate/2-iminopropanoate deaminase (Fragment) OS=Xenopus tropicalis OX=8364 GN=LOC496671 PE=2 SV=1 - [Q5M8W7_XENTR]	7.3	4	1	1	1		0			2.29071	7.3	1	1	137	14.4255	7.94287
A0A6I8Q1W0	gmps	Glutamine amidotransferase	Xenopus tropicalis	Glutamine amidotransferase OS=Xenopus tropicalis OX=8364 GN=gmps PE=4 SV=1 - [A0A6I8Q1W0_XENTR]	1.6	6	1	1	1		0			0	1.6	1	1	687	76.0364	6.93213
A0A1B8XWK0	XENTR_v90030749mg	CAD protein	Xenopus tropicalis	CAD protein OS=Xenopus tropicalis OX=8364 GN=XENTR_v90030749mg PE=3 SV=1 - [A0A1B8XWK0_XENTR]	1.32	8	1	1	1		0			2.8178	1.32	1	1	1964	217.225	6.50732
A0A6I8QBI6	siae	Sialic acid acetylesterase	Xenopus tropicalis	Sialic acid acetylesterase OS=Xenopus tropicalis OX=8364 GN=siae PE=4 SV=2 - [A0A6I8QBI6_XENTR]	2.3	5	1	1	1		0			1.69959	2.3	1	1	478	54.1225	5.70654
A0A803KKY1	rps10	Ribosomal protein S10	Xenopus tropicalis	Ribosomal protein S10 OS=Xenopus tropicalis OX=8364 GN=rps10 PE=2 SV=1 - [A0A803KKY1_XENTR]	9.09	7	1	1	1		0			2.33359	9.09	1	1	165	18.8709	10.1108
A0A6I8REN9	ndufa5	Complex I subunit B13	Xenopus tropicalis	Complex I subunit B13 OS=Xenopus tropicalis OX=8364 GN=ndufa5 PE=3 SV=1 - [A0A6I8REN9_XENTR]	13.64	4	1	1	1		0			2.26623	13.64	1	1	110	12.7847	5.93506
A0A803JP98	psmd4	Proteasome 26S subunit, non-ATPase 4	Xenopus tropicalis	Proteasome 26S subunit, non-ATPase 4 OS=Xenopus tropicalis OX=8364 GN=psmd4 PE=4 SV=1 - [A0A803JP98_XENTR]	3.22	8	1	1	1		0			0	3.22	1	1	373	40.3581	4.79248
A0A6I8QGU4	actn3	Actinin alpha 3 (gene/pseudogene)	Xenopus tropicalis	Actinin alpha 3 (gene/pseudogene) OS=Xenopus tropicalis OX=8364 GN=actn3 PE=3 SV=2 - [A0A6I8QGU4_XENTR]	1.41	10	1	1	1		0			1.6999	1.41	1	1	851	98.3577	5.50342
F6PIZ4	rbbp8nl	RBBP8 N-terminal-like	Xenopus tropicalis	RBBP8 N-terminal-like OS=Xenopus tropicalis OX=8364 GN=rbbp8nl PE=2 SV=2 - [F6PIZ4_XENTR]	2.49	1	1	1	1		0			2.05279	2.49	1	1	643	73.0175	6.94678
Q6DK80	krt70	Keratin	Xenopus tropicalis	Keratin OS=Xenopus tropicalis OX=8364 GN=krt70 PE=2 SV=1 - [Q6DK80_XENTR]	2.14	1	1	1	1		0			2.26088	2.14	1	1	421	46.9402	5.19873
A0A6I8SJM6	cse1l	Chromosome segregation 1-like protein	Xenopus tropicalis	Chromosome segregation 1-like protein OS=Xenopus tropicalis OX=8364 GN=cse1l PE=3 SV=2 - [A0A6I8SJM6_XENTR]	1.42	5	1	1	1		0			2.25378	1.42	1	1	915	103.351	5.80811
Q505I1	fgb	Fibrinogen beta chain (Fragment)	Xenopus tropicalis	Fibrinogen beta chain (Fragment) OS=Xenopus tropicalis OX=8364 GN=fgb PE=2 SV=1 - [Q505I1_XENTR]	1.85	3	1	1	1		0			1.9816	1.85	1	1	486	54.5702	6.29053
A0A803JAN8	alb	Albumin	Xenopus tropicalis	Albumin OS=Xenopus tropicalis OX=8364 GN=alb PE=4 SV=1 - [A0A803JAN8_XENTR]	1.71	3	1	1	1		0			2.96413	1.71	1	1	586	67.5276	5.99854
B0BM08	MGC76324	MGC76324 protein (Fragment)	Xenopus tropicalis	MGC76324 protein (Fragment) OS=Xenopus tropicalis OX=8364 GN=MGC76324 PE=2 SV=1 - [B0BM08_XENTR]	8.97	14	1	1	1		0			0	8.97	1	1	145	16.1869	4.61475
Q6PG55	atp5pf.L	ATP synthase-coupling factor 6, mitochondrial	Xenopus laevis	ATP synthase-coupling factor 6, mitochondrial OS=Xenopus laevis OX=8355 GN=atp5pf.L PE=1 SV=1 - [Q6PG55_XENLA]	12.15	1	1	1	1					2.06802	12.15	1	1	107	12.3515	9.40771
A0A1L8H4E9	XELAEV_18019576mg	Uncharacterized protein	Xenopus laevis	Uncharacterized protein OS=Xenopus laevis OX=8355 GN=XELAEV_18019576mg PE=4 SV=1 - [A0A1L8H4E9_XENLA]	4.42	6	1	1	1					2.08157	4.42	1	1	226	25.7108	7.82568
A0A1L8GWZ4	ndufa2.L	NADH dehydrogenase [ubiquinone] 1 alpha subcomplex subunit 2	Xenopus laevis	NADH dehydrogenase [ubiquinone] 1 alpha subcomplex subunit 2 OS=Xenopus laevis OX=8355 GN=ndufa2.L PE=3 SV=1 - [A0A1L8GWZ4_XENLA]	16	4	1	1	1					2.97515	16	1	1	100	11.258	9.71533
A0A1L8FSQ0	ndufv2.S	NADH dehydrogenase [ubiquinone] flavoprotein 2, mitochondrial	Xenopus laevis	NADH dehydrogenase [ubiquinone] flavoprotein 2, mitochondrial OS=Xenopus laevis OX=8355 GN=ndufv2.S PE=3 SV=1 - [A0A1L8FSQ0_XENLA]	6.1	2	1	1	1					1.96647	6.1	1	1	213	23.6117	5.57959
A0A1L8FEI7	atp5mk.S	Uncharacterized protein	Xenopus laevis	Uncharacterized protein OS=Xenopus laevis OX=8355 GN=atp5mk.S PE=4 SV=1 - [A0A1L8FEI7_XENLA]	16.95	2	1	1	1					2.0375	16.95	1	1	59	6.56745	9.90576
Q6GPL6	gca.L	MGC83560 protein	Xenopus laevis	MGC83560 protein OS=Xenopus laevis OX=8355 GN=gca.L PE=1 SV=1 - [Q6GPL6_XENLA]	7.73	1	1	1	1					1.98229	7.73	1	1	207	23.6141	5.59229
Q66KW6	cpo.1.L	MGC85368 protein	Xenopus laevis	MGC85368 protein OS=Xenopus laevis OX=8355 GN=cpo.1.L PE=2 SV=1 - [Q66KW6_XENLA]	3.93	2	1	1	1					0	3.93	1	1	356	40.9422	6.39209
Q91567	G56	G56 protein (Fragment)	Xenopus laevis	G56 protein (Fragment) OS=Xenopus laevis OX=8355 GN=G56 PE=2 SV=1 - [Q91567_XENLA]	21.57	10	1	1	1					2.19119	21.57	1	1	51	5.57397	8.57275
Q9ZZM1	Cytochrome c oxidase subunit 2 (Fragment) OS=Xenopus laevis OX=8355	Cytochrome c oxidase subunit 2 (Fragment)	Xenopus laevis	Cytochrome c oxidase subunit 2 (Fragment) OS=Xenopus laevis OX=8355 PE=2 SV=1 - [Q9ZZM1_XENLA]	9.22	22	1	1	1					3.27802	9.22	1	1	217	24.6673	4.729
Q28IQ2	ret	Sorcin	Xenopus tropicalis	Sorcin OS=Xenopus tropicalis OX=8364 GN=ret PE=2 SV=1 - [Q28IQ2_XENTR]	5.64	4	1	1	1					2.12484	5.64	1	1	195	21.6032	5.89697
Q6P7Z2	elob	Elongin B	Xenopus tropicalis	Elongin B OS=Xenopus tropicalis OX=8364 GN=elob PE=2 SV=1 - [Q6P7Z2_XENTR]	5.88	5	1	1	1					1.88162	5.88	1	1	119	13.2466	5.12256
A0A6I8SNK4	tyms	Thymidylate synthase	Xenopus tropicalis	Thymidylate synthase OS=Xenopus tropicalis OX=8364 GN=tyms PE=4 SV=2 - [A0A6I8SNK4_XENTR]	4.96	4	1	1	1					2.32694	4.96	1	1	282	32.4082	7.6499
A0A1B8XU39	XENTR_v900276441mg	ZnF_CDGSH domain-containing protein (Fragment)	Xenopus tropicalis	ZnF_CDGSH domain-containing protein (Fragment) OS=Xenopus tropicalis OX=8364 GN=XENTR_v900276441mg PE=4 SV=1 - [A0A1B8XU39_XENTR]	13.4	4	1	1	1					2.28415	13.4	1	1	97	10.8173	8.1626
A0A803K5T0	spr	Sepiapterin reductase	Xenopus tropicalis	Sepiapterin reductase OS=Xenopus tropicalis OX=8364 GN=spr PE=4 SV=1 - [A0A803K5T0_XENTR]	4.2	2	1	1	1					2.14613	4.2	1	1	262	28.5028	7.81104
F7BIN3	ergic1	Endoplasmic reticulum-golgi intermediate compartment 1	Xenopus tropicalis	Endoplasmic reticulum-golgi intermediate compartment 1 OS=Xenopus tropicalis OX=8364 GN=ergic1 PE=3 SV=4 - [F7BIN3_XENTR]	3.69	6	1	1	1					0	3.69	1	1	271	30.5733	6.44287
A0A803KH87	ssr1	Signal sequence receptor, alpha (translocon-associated protein alpha)	Xenopus tropicalis	Signal sequence receptor, alpha (translocon-associated protein alpha) OS=Xenopus tropicalis OX=8364 GN=ssr1 PE=4 SV=1 - [A0A803KH87_XENTR]	2.89	7	1	1	1					0	2.89	1	1	277	30.9633	4.42432
Q08AW0	LOC100036826	LOC100036826 protein (Fragment)	Xenopus laevis	LOC100036826 protein (Fragment) OS=Xenopus laevis OX=8355 GN=LOC100036826 PE=2 SV=1 - [Q08AW0_XENLA]	3.87	7	1	1	1	1.89155	3.87	1	1		0			413	44.8418	6.01123
Q6DE12	plin3.S	Perilipin	Xenopus laevis	Perilipin OS=Xenopus laevis OX=8355 GN=plin3.S PE=2 SV=1 - [Q6DE12_XENLA]	3.76	1	1	1	1	1.65043	3.76	1	1		0			425	46.1541	5.5415
A0A1L8HC45	XELAEV_18011347mg	Uncharacterized protein	Xenopus laevis	Uncharacterized protein OS=Xenopus laevis OX=8355 GN=XELAEV_18011347mg PE=3 SV=1 - [A0A1L8HC45_XENLA]	2.91	1	1	1	1	0	2.91	1	1		0			584	63.5761	8.22119
Q3KQ13	krt18.3.L	MGC131121 protein	Xenopus laevis	MGC131121 protein OS=Xenopus laevis OX=8355 GN=krt18.3.L PE=2 SV=1 - [Q3KQ13_XENLA]	2.91	2	1	1	2	4.30286	2.91	1	2		0			378	42.9578	5.19873
A0A1L8ERS0	XELAEV_18043128mg	IF rod domain-containing protein	Xenopus laevis	IF rod domain-containing protein OS=Xenopus laevis OX=8355 GN=XELAEV_18043128mg PE=3 SV=1 - [A0A1L8ERS0_XENLA]	6.52	3	1	1	1	2.12534	6.52	1	1		0			414	45.3957	5.47803
A0A1B8Y9M8	XENTR_v90028528mg	IF rod domain-containing protein	Xenopus tropicalis	IF rod domain-containing protein OS=Xenopus tropicalis OX=8364 GN=XENTR_v90028528mg PE=3 SV=1 - [A0A1B8Y9M8_XENTR]	2.86	2	1	1	1	2.50397	2.86	1	1		0			385	43.3444	5.66846

## Sheet: C-eB2-comparison-summary
Accession	Gene	Protein name	Organism	Description	ΣCoverage	Σ# Proteins	Σ# Unique Peptides	Σ# Peptides	Σ# PSMs	# PSM Control	# PSM eB2	Ratio(eB2/C)	# AAs	MW [kDa]	calc. pI
Q6PF53	efnb2.L	Efnb2a protein	Xenopus laevis	Efnb2a protein OS=Xenopus laevis OX=8355 GN=efnb2.L PE=2 SV=1 - [Q6PF53_XENLA]	65.35	5	11	26	317		317	infinity	329	36.3094	8.14795
B0FLR3	efnb2.S	Ephrin-B2b	Xenopus laevis	Ephrin-B2b OS=Xenopus laevis OX=8355 GN=efnb2.S PE=2 SV=1 - [B0FLR3_XENLA]	44.51	5	1	16	239		239	infinity	328	36.3505	8.45557
A0A1L8FLY7	eno1.L	2-phospho-D-glycerate hydro-lyase	Xenopus laevis	2-phospho-D-glycerate hydro-lyase OS=Xenopus laevis OX=8355 GN=eno1.L PE=3 SV=1 - [A0A1L8FLY7_XENLA]	66.59	6	3	25	107		107	infinity	434	47.3422	6.12549
A0A1L8F5P2	tubb4b.L	Tubulin beta chain	Xenopus laevis	Tubulin beta chain OS=Xenopus laevis OX=8355 GN=tubb4b.L PE=1 SV=1 - [A0A1L8F5P2_XENLA]	72.13	13	1	24	80		80	infinity	445	49.784	4.89404
Q7ZY50	tubb4b.S	Tubulin beta chain	Xenopus laevis	Tubulin beta chain OS=Xenopus laevis OX=8355 GN=tubb4b.S PE=2 SV=1 - [Q7ZY50_XENLA]	70.11	13	1	23	74		74	infinity	445	49.7769	4.85596
A1L3K7	LOC100037034	2-phospho-D-glycerate hydro-lyase	Xenopus laevis	2-phospho-D-glycerate hydro-lyase OS=Xenopus laevis OX=8355 GN=LOC100037034 PE=2 SV=1 - [A1L3K7_XENLA]	37.33	1	2	13	71		71	infinity	434	47.1112	6.80029
Q8AV69	ror2.L	Receptor tyrosine kinase Xror2	Xenopus laevis	Receptor tyrosine kinase Xror2 OS=Xenopus laevis OX=8355 GN=ror2.L PE=2 SV=1 - [Q8AV69_XENLA]	35.38	6	22	22	60		60	infinity	930	104.014	6.22705
A0A1L8FXS6	tubb2b.L	Tubulin beta chain	Xenopus laevis	Tubulin beta chain OS=Xenopus laevis OX=8355 GN=tubb2b.L PE=3 SV=1 - [A0A1L8FXS6_XENLA]	56.85	9	0	19	58		58	infinity	445	49.9069	4.89404
A0A6I8Q420	eno1	2-phospho-D-glycerate hydro-lyase	Xenopus tropicalis	2-phospho-D-glycerate hydro-lyase OS=Xenopus tropicalis OX=8364 GN=eno1 PE=3 SV=1 - [A0A6I8Q420_XENTR]	34.53	7	1	12	53		53	infinity	391	42.791	7.00537
Q6P367	tubb2b	Tubulin beta chain	Xenopus tropicalis	Tubulin beta chain OS=Xenopus tropicalis OX=8364 GN=tubb2b PE=2 SV=1 - [Q6P367_XENTR]	64.04	12	0	20	52		52	infinity	445	49.889	4.89404
Q5BL39	tubb4a	Tubulin beta chain	Xenopus tropicalis	Tubulin beta chain OS=Xenopus tropicalis OX=8364 GN=tubb4a PE=2 SV=1 - [Q5BL39_XENTR]	51.58	12	3	17	48		48	infinity	444	49.7059	4.91943
Q5EAW6	Xdsh	Xdsh protein	Xenopus laevis	Xdsh protein OS=Xenopus laevis OX=8355 GN=Xdsh PE=2 SV=1 - [Q5EAW6_XENLA]	40.56	8	5	19	47		47	infinity	673	73.1521	5.94775
Q8AVP8	ppia.S	Peptidyl-prolyl cis-trans isomerase	Xenopus laevis	Peptidyl-prolyl cis-trans isomerase OS=Xenopus laevis OX=8355 GN=ppia.S PE=1 SV=1 - [Q8AVP8_XENLA]	57.32	3	5	6	44		44	infinity	164	17.9008	8.35303
Q8AVE2	hspa1l.S	Hsc70 protein	Xenopus laevis	Hsc70 protein OS=Xenopus laevis OX=8355 GN=hspa1l.S PE=2 SV=1 - [Q8AVE2_XENLA]	38.46	22	1	20	42		42	infinity	650	71.1444	5.59229
Q7ZTK6	hspa8.L	MGC53952 protein	Xenopus laevis	MGC53952 protein OS=Xenopus laevis OX=8355 GN=hspa8.L PE=2 SV=1 - [Q7ZTK6_XENLA]	41.49	24	1	21	42		42	infinity	646	70.7481	5.40186
A0A1L8H4V1	XELAEV_18019661mg	Uncharacterized protein	Xenopus laevis	Uncharacterized protein OS=Xenopus laevis OX=8355 GN=XELAEV_18019661mg PE=1 SV=1 - [A0A1L8H4V1_XENLA]	29.94	11	3	17	42		42	infinity	678	73.6249	6.34131
A1L3K5	LOC100037033	LOC100037033 protein	Xenopus laevis	LOC100037033 protein OS=Xenopus laevis OX=8355 GN=LOC100037033 PE=2 SV=1 - [A1L3K5_XENLA]	37.15	10	1	19	40		40	infinity	646	70.8272	5.51611
Q9I8J7	tktl2.L	MGC69114 protein	Xenopus laevis	MGC69114 protein OS=Xenopus laevis OX=8355 GN=tktl2.L PE=1 SV=1 - [Q9I8J7_XENLA]	39.52	5	18	20	37		37	infinity	625	67.4088	6.72705
Q6NRQ9	MGC82327	Glutathione-dependent dehydroascorbate reductase	Xenopus laevis	Glutathione-dependent dehydroascorbate reductase OS=Xenopus laevis OX=8355 GN=MGC82327 PE=2 SV=1 - [Q6NRQ9_XENLA]	47.3	10	12	12	35		35	infinity	241	27.5511	6.3667
A0A1L8G769	mdh1.L	Malate dehydrogenase	Xenopus laevis	Malate dehydrogenase OS=Xenopus laevis OX=8355 GN=mdh1.L PE=3 SV=1 - [A0A1L8G769_XENLA]	60.78	1	5	14	33		33	infinity	334	36.3559	6.58057
Q7SZB1	pfn1.S	Profilin	Xenopus laevis	Profilin OS=Xenopus laevis OX=8355 GN=pfn1.S PE=2 SV=1 - [Q7SZB1_XENLA]	72.26	2	7	8	32		32	infinity	137	14.8692	7.53271
Q7ZWR6	atp5f1b.S	ATP synthase subunit beta	Xenopus laevis	ATP synthase subunit beta OS=Xenopus laevis OX=8355 GN=atp5f1b.S PE=1 SV=1 - [Q7ZWR6_XENLA]	41.52	4	2	15	30		30	infinity	525	56.3385	5.40186
Q68EY5	atp5f1a.L	ATP synthase subunit alpha	Xenopus laevis	ATP synthase subunit alpha OS=Xenopus laevis OX=8355 GN=atp5f1a.L PE=2 SV=1 - [Q68EY5_XENLA]	32.91	2	2	14	29		29	infinity	553	59.8508	9.1001
A0A1L8HS35	XELAEV_18011128mg	ATP synthase subunit alpha	Xenopus laevis	ATP synthase subunit alpha OS=Xenopus laevis OX=8355 GN=XELAEV_18011128mg PE=1 SV=1 - [A0A1L8HS35_XENLA]	32.91	9	2	14	29		29	infinity	553	59.9368	9.1001
A0A1L8G0L3	mdh1.S	Malate dehydrogenase	Xenopus laevis	Malate dehydrogenase OS=Xenopus laevis OX=8355 GN=mdh1.S PE=1 SV=1 - [A0A1L8G0L3_XENLA]	60.78	4	5	14	28		28	infinity	334	36.4019	6.91748
A0A1L8HHY6	atp5f1b.L	ATP synthase subunit beta	Xenopus laevis	ATP synthase subunit beta OS=Xenopus laevis OX=8355 GN=atp5f1b.L PE=3 SV=1 - [A0A1L8HHY6_XENLA]	38.48	1	1	14	28		28	infinity	525	56.3985	5.35107
A0A1L8H000	pkm.L	Pyruvate kinase	Xenopus laevis	Pyruvate kinase OS=Xenopus laevis OX=8355 GN=pkm.L PE=1 SV=1 - [A0A1L8H000_XENLA]	37.76	9	11	15	28		28	infinity	527	57.2895	7.31299
A0A1L8GCZ4	XELAEV_18024169mg	Pyruvate carboxylase	Xenopus laevis	Pyruvate carboxylase OS=Xenopus laevis OX=8355 GN=XELAEV_18024169mg PE=1 SV=1 - [A0A1L8GCZ4_XENLA]	21.41	1	6	19	27		27	infinity	1177	130.396	6.78564
Q6GP33	gpi.S	Glucose-6-phosphate isomerase	Xenopus laevis	Glucose-6-phosphate isomerase OS=Xenopus laevis OX=8355 GN=gpi.S PE=2 SV=1 - [Q6GP33_XENLA]	35.8	1	7	14	24		24	infinity	553	62.0667	7.47412
A0A1L8I1W4	rpl6.L	60S ribosomal protein L6	Xenopus laevis	60S ribosomal protein L6 OS=Xenopus laevis OX=8355 GN=rpl6.L PE=1 SV=1 - [A0A1L8I1W4_XENLA]	33.72	2	3	9	24		24	infinity	258	29.6408	10.9604
Q7SY96	rpl4.S	Rpl4-b protein	Xenopus laevis	Rpl4-b protein OS=Xenopus laevis OX=8355 GN=rpl4.S PE=1 SV=1 - [Q7SY96_XENLA]	30.17	8	11	11	23		23	infinity	401	45.3968	10.9897
Q7ZXA2	eef1a1o.S	Elongation factor 1-alpha	Xenopus laevis	Elongation factor 1-alpha OS=Xenopus laevis OX=8355 GN=eef1a1o.S PE=2 SV=1 - [Q7ZXA2_XENLA]	27.11	6	1	11	23		23	infinity	461	50.1923	9.15869
A0A1L8HFS9	eef1a1o.L	Elongation factor 1-alpha	Xenopus laevis	Elongation factor 1-alpha OS=Xenopus laevis OX=8355 GN=eef1a1o.L PE=3 SV=1 - [A0A1L8HFS9_XENLA]	24.51	5	1	10	22		22	infinity	461	50.0913	9.17334
A0A1L8GQX2	ldhb.S	L-lactate dehydrogenase	Xenopus laevis	L-lactate dehydrogenase OS=Xenopus laevis OX=8355 GN=ldhb.S PE=1 SV=1 - [A0A1L8GQX2_XENLA]	27.84	6	4	9	22		22	infinity	334	36.3942	6.93213
A0A1L8GGZ9	XELAEV_18025652mg	Uncharacterized protein	Xenopus laevis	Uncharacterized protein OS=Xenopus laevis OX=8355 GN=XELAEV_18025652mg PE=3 SV=1 - [A0A1L8GGZ9_XENLA]	28.54	13	10	10	22		22	infinity	403	46.0538	10.1987
Q6PI76	rps14.S	Rps14-prov protein	Xenopus laevis	Rps14-prov protein OS=Xenopus laevis OX=8355 GN=rps14.S PE=1 SV=1 - [Q6PI76_XENLA]	41.72	4	9	9	21		21	infinity	151	16.2625	10.0522
A0A1L8HLR2	rps3a.S	40S ribosomal protein S3a	Xenopus laevis	40S ribosomal protein S3a OS=Xenopus laevis OX=8355 GN=rps3a.S PE=1 SV=1 - [A0A1L8HLR2_XENLA]	35.23	3	10	10	21		21	infinity	264	29.9218	9.71533
Q6GQB3	prdx1.S	MGC80194 protein	Xenopus laevis	MGC80194 protein OS=Xenopus laevis OX=8355 GN=prdx1.S PE=2 SV=1 - [Q6GQB3_XENLA]	44.22	5	2	6	21		21	infinity	199	22.3433	6.34131
Q6DJF7	rpl6.S	60S ribosomal protein L6	Xenopus laevis	60S ribosomal protein L6 OS=Xenopus laevis OX=8355 GN=rpl6.S PE=2 SV=1 - [Q6DJF7_XENLA]	36.05	2	2	9	21		21	infinity	258	29.6518	10.8433
Q6PCI8	pc.1.L	Pyruvate carboxylase	Xenopus laevis	Pyruvate carboxylase OS=Xenopus laevis OX=8355 GN=pc.1.L PE=1 SV=1 - [Q6PCI8_XENLA]	17.59	1	2	15	21		21	infinity	1177	130.011	6.93213
A0A1L8FM89	Wnt4	Protein Wnt	Xenopus laevis	Protein Wnt OS=Xenopus laevis OX=8355 GN=XELAEV_18035683mg PE=3 SV=1 - [A0A1L8FM89_XENLA]	29.34	11	10	10	21		21	infinity	351	39.157	8.20654
Q9I9M9	slc25a5.L	ADP/ATP translocase	Xenopus laevis	ADP/ATP translocase OS=Xenopus laevis OX=8355 GN=slc25a5.L PE=1 SV=1 - [Q9I9M9_XENLA]	24.16	3	1	8	20		20	infinity	298	32.9191	9.70068
Q6PBF5	slc25a5	ADP/ATP translocase	Xenopus tropicalis	ADP/ATP translocase OS=Xenopus tropicalis OX=8364 GN=slc25a5 PE=2 SV=1 - [Q6PBF5_XENTR]	25.17	3	1	8	20		20	infinity	298	33.1072	9.74463
Q28IA0	csrp2	Cysteine and glycine-rich protein 2	Xenopus tropicalis	Cysteine and glycine-rich protein 2 OS=Xenopus tropicalis OX=8364 GN=csrp2 PE=2 SV=1 - [Q28IA0_XENTR]	45.83	3	5	8	20		20	infinity	192	20.8507	8.52881
Q7ZWJ2	uqcrc1.L	Uqcrc1 protein	Xenopus laevis	Uqcrc1 protein OS=Xenopus laevis OX=8355 GN=uqcrc1.L PE=2 SV=1 - [Q7ZWJ2_XENLA]	29.71	6	10	10	19		19	infinity	478	52.3124	6.21436
A0A1L8EXB4	XELAEV_18045092mg	GLOBIN domain-containing protein	Xenopus laevis	GLOBIN domain-containing protein OS=Xenopus laevis OX=8355 GN=XELAEV_18045092mg PE=3 SV=1 - [A0A1L8EXB4_XENLA]	69.72	12	9	9	19		19	infinity	142	15.6541	5.78271
B0BMH1	krt12.5	Krt12 protein	Xenopus tropicalis	Krt12 protein OS=Xenopus tropicalis OX=8364 GN=krt12.5 PE=2 SV=1 - [B0BMH1_XENTR]	6.67	23	5	5	19		19	infinity	450	48.9557	5.10986
Q7SYQ4	prdx6.S	MGC64582 protein	Xenopus laevis	MGC64582 protein OS=Xenopus laevis OX=8355 GN=prdx6.S PE=1 SV=1 - [Q7SYQ4_XENLA]	49.55	6	8	8	19		19	infinity	224	25.0537	5.66846
G1K3L3	tubb6	Tubulin beta chain	Xenopus tropicalis	Tubulin beta chain OS=Xenopus tropicalis OX=8364 GN=tubb6 PE=2 SV=2 - [G1K3L3_XENTR]	20.18	10	1	6	18		18	infinity	446	50.003	4.85596
A0A1L8EKH3	XELAEV_18045881mg	IF rod domain-containing protein	Xenopus laevis	IF rod domain-containing protein OS=Xenopus laevis OX=8355 GN=XELAEV_18045881mg PE=1 SV=1 - [A0A1L8EKH3_XENLA]	6.22	2	3	4	17		17	infinity	434	47.5085	5.32568
A0A1L8GCW3	cfl1.S	ADF-H domain-containing protein	Xenopus laevis	ADF-H domain-containing protein OS=Xenopus laevis OX=8355 GN=cfl1.S PE=1 SV=1 - [A0A1L8GCW3_XENLA]	58.33	3	4	8	16		16	infinity	168	19.1077	7.75244
Q6DE33	uqcrc2.L	Uqcrc2 protein	Xenopus laevis	Uqcrc2 protein OS=Xenopus laevis OX=8355 GN=uqcrc2.L PE=2 SV=1 - [Q6DE33_XENLA]	29.49	4	3	10	16		16	infinity	451	47.8316	8.90967
A0A1L8I3J8	rpl17.L	60S ribosomal protein L17	Xenopus laevis	60S ribosomal protein L17 OS=Xenopus laevis OX=8355 GN=rpl17.L PE=3 SV=1 - [A0A1L8I3J8_XENLA]	36.41	5	6	6	16		16	infinity	184	21.3964	10.1841
Q3KQC9	rps16	Rps16 protein	Xenopus laevis	Rps16 protein OS=Xenopus laevis OX=8355 GN=rps16 PE=2 SV=1 - [Q3KQC9_XENLA]	39.04	4	5	5	16		16	infinity	146	16.32	10.1401
A0A1L8GWQ3	ldhb.L	L-lactate dehydrogenase	Xenopus laevis	L-lactate dehydrogenase OS=Xenopus laevis OX=8355 GN=ldhb.L PE=3 SV=1 - [A0A1L8GWQ3_XENLA]	19.16	1	1	6	16		16	infinity	334	36.4952	6.91748
A0A1L8GJZ1	XELAEV_18022280mg	ADF-H domain-containing protein	Xenopus laevis	ADF-H domain-containing protein OS=Xenopus laevis OX=8355 GN=XELAEV_18022280mg PE=1 SV=1 - [A0A1L8GJZ1_XENLA]	30.82	1	3	7	16		16	infinity	292	32.919	9.12939
F7AZ24	krt17	Keratin 17	Xenopus tropicalis	Keratin 17 OS=Xenopus tropicalis OX=8364 GN=krt17 PE=3 SV=4 - [F7AZ24_XENTR]	6.87	1	3	6	16		16	infinity	451	49.6499	5.43994
A0A1B8XTN6	XENTR_v90028266mg	60S ribosomal protein L13a	Xenopus tropicalis	60S ribosomal protein L13a OS=Xenopus tropicalis OX=8364 GN=XENTR_v90028266mg PE=3 SV=1 - [A0A1B8XTN6_XENTR]	27.03	7	8	8	16		16	infinity	222	25.4625	11.1216
A0A1L8FIG2	tpi1.L	Triosephosphate isomerase	Xenopus laevis	Triosephosphate isomerase OS=Xenopus laevis OX=8355 GN=tpi1.L PE=1 SV=1 - [A0A1L8FIG2_XENLA]	42.34	1	4	7	16		16	infinity	248	26.8629	7.00537
A0A1L8FZP0	XELAEV_18032253mg	14_3_3 domain-containing protein	Xenopus laevis	14_3_3 domain-containing protein OS=Xenopus laevis OX=8355 GN=XELAEV_18032253mg PE=1 SV=1 - [A0A1L8FZP0_XENLA]	39.59	13	6	8	15		15	infinity	245	27.7117	4.79248
A0A1L8FZ13	rps20.L	40S ribosomal protein S20	Xenopus laevis	40S ribosomal protein S20 OS=Xenopus laevis OX=8355 GN=rps20.L PE=3 SV=1 - [A0A1L8FZ13_XENLA]	23.53	5	2	4	15		15	infinity	119	13.3473	9.93506
Q6DCT5	aldh2.L	MGC80785 protein	Xenopus laevis	MGC80785 protein OS=Xenopus laevis OX=8355 GN=aldh2.L PE=1 SV=1 - [Q6DCT5_XENLA]	29.17	16	11	11	15		15	infinity	521	57.2133	7.6499
A0A1L8HJI5	XELAEV_18013932mg	Ribonucleoside-diphosphate reductase	Xenopus laevis	Ribonucleoside-diphosphate reductase OS=Xenopus laevis OX=8355 GN=XELAEV_18013932mg PE=1 SV=1 - [A0A1L8HJI5_XENLA]	22.89	9	1	10	15		15	infinity	734	83.4658	6.40479
A0A1L8FXW1	XELAEV_180316181mg	Uncharacterized protein (Fragment)	Xenopus laevis	Uncharacterized protein (Fragment) OS=Xenopus laevis OX=8355 GN=XELAEV_180316181mg PE=1 SV=1 - [A0A1L8FXW1_XENLA]	2.96	4	6	6	15		15	infinity	2802	323.337	6.90283
A0A1L8FRX7	XELAEV_18033323mg	Succinate dehydrogenase [ubiquinone] flavoprotein subunit, mitochondrial	Xenopus laevis	Succinate dehydrogenase [ubiquinone] flavoprotein subunit, mitochondrial OS=Xenopus laevis OX=8355 GN=XELAEV_18033323mg PE=3 SV=1 - [A0A1L8FRX7_XENLA]	22.71	1	1	8	15		15	infinity	665	72.724	6.96143
A0A1L8F8E2	rps5.L	Ribosomal_S7 domain-containing protein	Xenopus laevis	Ribosomal_S7 domain-containing protein OS=Xenopus laevis OX=8355 GN=rps5.L PE=1 SV=1 - [A0A1L8F8E2_XENLA]	27.09	4	5	5	15		15	infinity	203	22.729	9.74463
A0A1L8ESY3	XELAEV_18043490mg	SH3 domain-containing protein	Xenopus laevis	SH3 domain-containing protein OS=Xenopus laevis OX=8355 GN=XELAEV_18043490mg PE=3 SV=1 - [A0A1L8ESY3_XENLA]	17.58	9	11	11	15		15	infinity	853	95.6969	8.35303
A0A1L8EKM0	XELAEV_18045879mg	IF rod domain-containing protein	Xenopus laevis	IF rod domain-containing protein OS=Xenopus laevis OX=8355 GN=XELAEV_18045879mg PE=1 SV=1 - [A0A1L8EKM0_XENLA]	6.55	2	1	5	15		15	infinity	458	50.267	5.43994
A0A6I8RXT6	rpl7	Ribosomal protein L7	Xenopus tropicalis	Ribosomal protein L7 OS=Xenopus tropicalis OX=8364 GN=rpl7 PE=3 SV=2 - [A0A6I8RXT6_XENTR]	26.64	7	6	6	15		15	infinity	244	28.6371	10.9604
F7DL49	rps18	40S ribosomal protein S18	Xenopus tropicalis	40S ribosomal protein S18 OS=Xenopus tropicalis OX=8364 GN=rps18 PE=3 SV=4 - [F7DL49_XENTR]	39.07	5	7	7	15		15	infinity	151	17.5488	10.8726
A0A1L8GUD0	csrp2.S	Uncharacterized protein	Xenopus laevis	Uncharacterized protein OS=Xenopus laevis OX=8355 GN=csrp2.S PE=1 SV=1 - [A0A1L8GUD0_XENLA]	50	1	5	8	15		15	infinity	192	20.7026	8.26514
A0A1L8EP22	dapl1.S	Uncharacterized protein	Xenopus laevis	Uncharacterized protein OS=Xenopus laevis OX=8355 GN=dapl1.S PE=1 SV=1 - [A0A1L8EP22_XENLA]	45.13	2	5	5	14		14	infinity	113	12.5177	9.99365
Q498I1	grhpr.2.L	LOC398508 protein	Xenopus laevis	LOC398508 protein OS=Xenopus laevis OX=8355 GN=grhpr.2.L PE=2 SV=1 - [Q498I1_XENLA]	34.83	5	7	7	14		14	infinity	333	36.0269	6.17627
Q8AVE3	hspa5.S	78 kDa glucose-regulated protein	Xenopus laevis	78 kDa glucose-regulated protein OS=Xenopus laevis OX=8355 GN=hspa5.S PE=1 SV=1 - [Q8AVE3_XENLA]	17.71	2	8	10	14		14	infinity	655	72.3745	5.13525
A0A1L8HBR9	XELAEV_18016520mg	Ribonucleoside-diphosphate reductase	Xenopus laevis	Ribonucleoside-diphosphate reductase OS=Xenopus laevis OX=8355 GN=XELAEV_18016520mg PE=1 SV=1 - [A0A1L8HBR9_XENLA]	22.14	9	1	10	14		14	infinity	777	88.3963	6.75635
A0A1L8GZZ1	XELAEV_18017961mg	Peptidase M60 domain-containing protein	Xenopus laevis	Peptidase M60 domain-containing protein OS=Xenopus laevis OX=8355 GN=XELAEV_18017961mg PE=1 SV=1 - [A0A1L8GZZ1_XENLA]	14.6	7	9	9	14		14	infinity	904	100.996	6.75635
A0A1L8FWH1	XELAEV_18031110mg	60S ribosomal protein L14	Xenopus laevis	60S ribosomal protein L14 OS=Xenopus laevis OX=8355 GN=XELAEV_18031110mg PE=3 SV=1 - [A0A1L8FWH1_XENLA]	36.96	3	5	5	14		14	infinity	138	16.1267	10.5356
A0A146J5C5	itln1al.L	Intelectin-4 subunit peptide	Xenopus laevis	Intelectin-4 subunit peptide OS=Xenopus laevis OX=8355 GN=itln1al.L PE=2 SV=1 - [A0A146J5C5_XENLA]	23.28	8	6	6	14		14	infinity	335	37.0597	5.90967
A0A1L8F9Q9	DNAAF2	Protein kintoun	Xenopus laevis	Protein kintoun OS=Xenopus laevis OX=8355 GN=DNAAF2 PE=3 SV=1 - [A0A1L8F9Q9_XENLA]	15.74	2	8	8	14		14	infinity	788	88.6045	5.07178
Q6DIV0	rack1	Guanine nucleotide binding protein (G protein), beta polypeptide	Xenopus tropicalis	Guanine nucleotide binding protein (G protein), beta polypeptide OS=Xenopus tropicalis OX=8364 GN=rack1 PE=2 SV=1 - [Q6DIV0_XENTR]	45.11	14	10	10	14		14	infinity	317	35.0745	7.69385
A0A1L8G3E8	eef1a1.L	Elongation factor 1-alpha	Xenopus laevis	Elongation factor 1-alpha OS=Xenopus laevis OX=8355 GN=eef1a1.L PE=1 SV=1 - [A0A1L8G3E8_XENLA]	25.32	11	3	9	13		13	infinity	462	50.1822	9.01221
Q8AY70	gapdh.L	Glyceraldehyde-3-phosphate dehydrogenase	Xenopus laevis	Glyceraldehyde-3-phosphate dehydrogenase OS=Xenopus laevis OX=8355 GN=gapdh.L PE=2 SV=1 - [Q8AY70_XENLA]	37.24	1	6	8	13		13	infinity	333	35.8793	8.25049
Q7ZXH6	ywhaq.S	Ywhaq-prov protein	Xenopus laevis	Ywhaq-prov protein OS=Xenopus laevis OX=8355 GN=ywhaq.S PE=2 SV=1 - [Q7ZXH6_XENLA]	32.52	11	1	7	13		13	infinity	246	27.6567	4.81787
A0A1L8HWL5	ndufa7.L	Complex I-B14.5a	Xenopus laevis	Complex I-B14.5a OS=Xenopus laevis OX=8355 GN=ndufa7.L PE=3 SV=1 - [A0A1L8HWL5_XENLA]	49.57	5	3	5	13		13	infinity	115	12.5875	9.87646
A0A1L8HPG3	XELAEV_18010175mg	HABP4_PAI-RBP1 domain-containing protein	Xenopus laevis	HABP4_PAI-RBP1 domain-containing protein OS=Xenopus laevis OX=8355 GN=XELAEV_18010175mg PE=1 SV=1 - [A0A1L8HPG3_XENLA]	32.28	2	6	6	13		13	infinity	378	42.6501	6.7417
A0A1L8F028	XELAEV_18041207mg	Alpha-1,4 glucan phosphorylase	Xenopus laevis	Alpha-1,4 glucan phosphorylase OS=Xenopus laevis OX=8355 GN=XELAEV_18041207mg PE=1 SV=1 - [A0A1L8F028_XENLA]	15.67	24	10	10	13		13	infinity	855	97.8114	7.60596
Q7SYT0	eef1a2.S	Elongation factor 1-alpha	Xenopus laevis	Elongation factor 1-alpha OS=Xenopus laevis OX=8355 GN=eef1a2.S PE=2 SV=1 - [Q7SYT0_XENLA]	21.81	8	1	9	13		13	infinity	463	50.4304	9.01221
Q7ZTQ8	uqcrc2.S	Uqcrc2-prov protein	Xenopus laevis	Uqcrc2-prov protein OS=Xenopus laevis OX=8355 GN=uqcrc2.S PE=2 SV=1 - [Q7ZTQ8_XENLA]	20.4	2	1	8	12		12	infinity	451	47.9696	8.92432
Q8AVB7	cct2.S	CCT-beta	Xenopus laevis	CCT-beta OS=Xenopus laevis OX=8355 GN=cct2.S PE=1 SV=1 - [Q8AVB7_XENLA]	20.75	5	8	8	12		12	infinity	535	57.6291	6.21436
A0A1L8HK38	XELAEV_18008676mg	Isocitrate dehydrogenase [NAD] subunit, mitochondrial	Xenopus laevis	Isocitrate dehydrogenase [NAD] subunit, mitochondrial OS=Xenopus laevis OX=8355 GN=XELAEV_18008676mg PE=1 SV=1 - [A0A1L8HK38_XENLA]	20.34	2	4	6	12		12	infinity	413	45.8366	8.57275
A0A1L8GBH6	ywhaq.L	14_3_3 domain-containing protein	Xenopus laevis	14_3_3 domain-containing protein OS=Xenopus laevis OX=8355 GN=ywhaq.L PE=3 SV=1 - [A0A1L8GBH6_XENLA]	30.89	12	1	7	12		12	infinity	246	27.7347	4.83057
A0A1L8EXD5	kpna7.L	Importin subunit alpha	Xenopus laevis	Importin subunit alpha OS=Xenopus laevis OX=8355 GN=kpna7.L PE=1 SV=1 - [A0A1L8EXD5_XENLA]	21.22	6	3	5	12		12	infinity	523	57.7721	5.33838
A0A1L8END4	XELAEV_18046891mg	40S ribosomal protein S11 (Fragment)	Xenopus laevis	40S ribosomal protein S11 (Fragment) OS=Xenopus laevis OX=8355 GN=XELAEV_18046891mg PE=3 SV=1 - [A0A1L8END4_XENLA]	27.1	8	6	6	12		12	infinity	155	18.0918	10.4771
A0A1L8I062	rplp0.L	60S acidic ribosomal protein P0	Xenopus laevis	60S acidic ribosomal protein P0 OS=Xenopus laevis OX=8355 GN=rplp0.L PE=3 SV=1 - [A0A1L8I062_XENLA]	20.38	5	5	5	12		12	infinity	314	34.0496	5.56689
A0A1L8HN62	rps15.S	40S ribosomal protein S15	Xenopus laevis	40S ribosomal protein S15 OS=Xenopus laevis OX=8355 GN=rps15.S PE=1 SV=1 - [A0A1L8HN62_XENLA]	28.28	6	2	2	11		11	infinity	145	16.9641	10.2573
Q7ZXK4	rpl10.S	Rpl10-prov protein	Xenopus laevis	Rpl10-prov protein OS=Xenopus laevis OX=8355 GN=rpl10.S PE=2 SV=1 - [Q7ZXK4_XENLA]	42.33	6	2	7	11		11	infinity	215	24.5248	10.1401
Q7ZX50	LOC444845	RNA helicase (Fragment)	Xenopus laevis	RNA helicase (Fragment) OS=Xenopus laevis OX=8355 GN=LOC444845 PE=2 SV=1 - [Q7ZX50_XENLA]	26.98	25	8	8	11		11	infinity	404	45.8294	5.47803
A0A1L8F5F1	rpl10.L	Ribosomal_L16 domain-containing protein	Xenopus laevis	Ribosomal_L16 domain-containing protein OS=Xenopus laevis OX=8355 GN=rpl10.L PE=1 SV=1 - [A0A1L8F5F1_XENLA]	41.4	6	3	8	11		11	infinity	215	24.5659	10.1987
Q6DCD3	hsp70	Hsp70 protein	Xenopus laevis	Hsp70 protein OS=Xenopus laevis OX=8355 GN=hsp70 PE=2 SV=1 - [Q6DCD3_XENLA]	11.9	5	2	6	11		11	infinity	647	70.9483	5.45264
A0A1L8HL68	XELAEV_18008996mg	60S ribosomal protein L9	Xenopus laevis	60S ribosomal protein L9 OS=Xenopus laevis OX=8355 GN=XELAEV_18008996mg PE=1 SV=1 - [A0A1L8HL68_XENLA]	27.34	4	1	5	10		10	infinity	289	32.8217	10.2427
Q7SZB2	rpl27a.L	60S ribosomal protein L27a	Xenopus laevis	60S ribosomal protein L27a OS=Xenopus laevis OX=8355 GN=rpl27a.L PE=1 SV=1 - [Q7SZB2_XENLA]	24.32	6	3	3	10		10	infinity	148	16.583	10.5649
Q66KV6	rpl28.S	60S ribosomal protein L28	Xenopus laevis	60S ribosomal protein L28 OS=Xenopus laevis OX=8355 GN=rpl28.S PE=1 SV=1 - [Q66KV6_XENLA]	18.25	1	1	3	10		10	infinity	137	15.5407	11.854
Q6DJJ7	rps20.S	40S ribosomal protein S20	Xenopus laevis	40S ribosomal protein S20 OS=Xenopus laevis OX=8355 GN=rps20.S PE=2 SV=1 - [Q6DJJ7_XENLA]	20.17	2	1	3	10		10	infinity	119	13.3353	9.93506
Q7SZA3	40S ribosomal protein S24 OS=Xenopus laevis OX=8355	40S ribosomal protein S24	Xenopus laevis	40S ribosomal protein S24 OS=Xenopus laevis OX=8355 PE=2 SV=1 - [Q7SZA3_XENLA]	52.05	6	3	3	10		10	infinity	73	8.34741	9.84717
A0A1L8GLT4	XELAEV_18022892mg	Phosvitin	Xenopus laevis	Phosvitin OS=Xenopus laevis OX=8355 GN=XELAEV_18022892mg PE=4 SV=1 - [A0A1L8GLT4_XENLA]	46.95	2	53	82	424	2	422	211	1817	202.99	8.93896
L7N325	LOC100494633	Phosvitin	Xenopus tropicalis	Phosvitin OS=Xenopus tropicalis OX=8364 GN=LOC100494633 PE=4 SV=4 - [L7N325_XENTR]	19.7	2	3	35	128	1	127	127	1812	201.428	8.90967
A0A1L8GFH3	XELAEV_18025047mg	Phosvitin	Xenopus laevis	Phosvitin OS=Xenopus laevis OX=8355 GN=XELAEV_18025047mg PE=4 SV=1 - [A0A1L8GFH3_XENLA]	42.38	1	29	67	262	3	259	86.3333	1732	193.259	8.93896
A0A803J270	LOC100494633	Uncharacterized XB5965023	Xenopus tropicalis	Uncharacterized XB5965023 OS=Xenopus tropicalis OX=8364 GN=LOC100494633 PE=4 SV=1 - [A0A803J270_XENTR]	11.82	4	1	21	77	1	76	76	1802	200.758	9.05615
A0A1L8GLM1	XELAEV_18022891mg	Phosvitin	Xenopus laevis	Phosvitin OS=Xenopus laevis OX=8355 GN=XELAEV_18022891mg PE=4 SV=1 - [A0A1L8GLM1_XENLA]	39.37	2	42	64	210	3	207	69	1816	202.22	9.1001
A0A1L8EXC8	actb.L	Uncharacterized protein	Xenopus laevis	Uncharacterized protein OS=Xenopus laevis OX=8355 GN=actb.L PE=3 SV=1 - [A0A1L8EXC8_XENLA]	54.13	10	7	17	67	1	66	66	375	41.7397	5.47803
A0A1L8GPR2	XELAEV_18024014mg	SH3 domain-containing protein	Xenopus laevis	SH3 domain-containing protein OS=Xenopus laevis OX=8355 GN=XELAEV_18024014mg PE=1 SV=1 - [A0A1L8GPR2_XENLA]	58.51	6	23	39	129	2	127	63.5	740	82.6197	6.46826
Q6GPT0	MGC82636	Adipocyte-type fatty acid-binding protein	Xenopus laevis	Adipocyte-type fatty acid-binding protein OS=Xenopus laevis OX=8355 GN=MGC82636 PE=2 SV=1 - [Q6GPT0_XENLA]	58.52	2	8	8	63	1	62	62	135	15.2818	6.18896
Q5U4V6	LOC397931	Tubulin alpha chain	Xenopus laevis	Tubulin alpha chain OS=Xenopus laevis OX=8355 GN=LOC397931 PE=2 SV=1 - [Q5U4V6_XENLA]	53.33	2	2	17	61	1	60	60	450	50.0354	5.14795
A0A1L8GHQ7	nckipsd.S	SH3 domain-containing protein	Xenopus laevis	SH3 domain-containing protein OS=Xenopus laevis OX=8355 GN=nckipsd.S PE=1 SV=1 - [A0A1L8GHQ7_XENLA]	53.17	2	18	34	121	2	119	59.5	741	82.5016	6.46826
A0A1L8GLL5	vtga2.L	Phosvitin	Xenopus laevis	Phosvitin OS=Xenopus laevis OX=8355 GN=vtga2.L PE=1 SV=1 - [A0A1L8GLL5_XENLA]	44.77	4	50	70	302	5	297	59.4	1807	201.418	9.0415
A0A1L8HJY0	rps3.L	DNA-(apurinic or apyrimidinic site) lyase	Xenopus laevis	DNA-(apurinic or apyrimidinic site) lyase OS=Xenopus laevis OX=8355 GN=rps3.L PE=3 SV=1 - [A0A1L8HJY0_XENLA]	74.8	5	1	19	57	1	56	56	246	26.9846	9.65674
Q6NRV3	tubal3.1.S	Tubulin alpha chain	Xenopus laevis	Tubulin alpha chain OS=Xenopus laevis OX=8355 GN=tubal3.1.S PE=1 SV=1 - [Q6NRV3_XENLA]	53.33	1	2	17	56	1	55	55	450	50.1675	5.14795
Q7ZYT3	rpls3-b	DNA-(apurinic or apyrimidinic site) lyase	Xenopus laevis	DNA-(apurinic or apyrimidinic site) lyase OS=Xenopus laevis OX=8355 GN=rpls3-b PE=2 SV=1 - [Q7ZYT3_XENLA]	74.8	5	1	19	55	1	54	54	246	26.9986	9.65674
Q5FWK8	alox12b.S	MGC85124 protein	Xenopus laevis	MGC85124 protein OS=Xenopus laevis OX=8355 GN=alox12b.S PE=2 SV=1 - [Q5FWK8_XENLA]	36.42	16	2	17	54	1	53	53	670	75.8321	5.87158
Q6P8G7	tuba1c	Tubulin alpha chain	Xenopus tropicalis	Tubulin alpha chain OS=Xenopus tropicalis OX=8364 GN=tuba1c PE=2 SV=1 - [Q6P8G7_XENTR]	50.33	9	0	16	44	1	43	43	449	49.8475	5.09717
A0A6I8RMY1	actc1	Actin, alpha cardiac muscle 1	Xenopus tropicalis	Actin, alpha cardiac muscle 1 OS=Xenopus tropicalis OX=8364 GN=actc1 PE=3 SV=1 - [A0A6I8RMY1_XENTR]	27.54	11	1	11	43	1	42	42	374	41.6328	5.70654
A0A803KCJ4	LOC100494633	Uncharacterized XB5965023	Xenopus tropicalis	Uncharacterized XB5965023 OS=Xenopus tropicalis OX=8364 GN=LOC100494633 PE=4 SV=1 - [A0A803KCJ4_XENTR]	13.09	2	2	20	81	2	79	39.5	1818	202.384	9.15869
A0A1L8HHR4	tuba1c.L	Tubulin alpha chain	Xenopus laevis	Tubulin alpha chain OS=Xenopus laevis OX=8355 GN=tuba1c.L PE=3 SV=1 - [A0A1L8HHR4_XENLA]	47.22	10	0	15	40	1	39	39	449	49.8475	5.09717
A0A1L8GZI9	XELAEV_18017873mg	Tubulin alpha chain	Xenopus laevis	Tubulin alpha chain OS=Xenopus laevis OX=8355 GN=XELAEV_18017873mg PE=1 SV=1 - [A0A1L8GZI9_XENLA]	42.86	1	1	13	40	1	39	39	434	48.4246	5.04639
A0A1L8GL32	gpi.L	Glucose-6-phosphate isomerase	Xenopus laevis	Glucose-6-phosphate isomerase OS=Xenopus laevis OX=8355 GN=gpi.L PE=1 SV=1 - [A0A1L8GL32_XENLA]	47.2	5	13	20	39	1	38	38	553	61.9185	7.34229
A0A803K9J1	tubal3.1	Tubulin alpha-like 3, gene 1	Xenopus tropicalis	Tubulin alpha-like 3, gene 1 OS=Xenopus tropicalis OX=8364 GN=tubal3.1 PE=4 SV=1 - [A0A803K9J1_XENTR]	41.69	3	0	14	36	1	35	35	451	50.0896	5.05908
A0A1L8HAC1	XELAEV_18016081mg	IF rod domain-containing protein	Xenopus laevis	IF rod domain-containing protein OS=Xenopus laevis OX=8355 GN=XELAEV_18016081mg PE=3 SV=1 - [A0A1L8HAC1_XENLA]	8.88	13	1	5	68	2	66	33	518	56.9733	8.04541
B7ZTG2	tuba4b	Tubulin alpha chain	Xenopus tropicalis	Tubulin alpha chain OS=Xenopus tropicalis OX=8364 GN=tuba4b PE=2 SV=1 - [B7ZTG2_XENTR]	35.41	4	1	13	34	1	33	33	449	49.9724	5.05908
Q7ZY52	XELAEV_18036725mg	Glyceraldehyde-3-phosphate dehydrogenase	Xenopus laevis	Glyceraldehyde-3-phosphate dehydrogenase OS=Xenopus laevis OX=8355 GN=XELAEV_18036725mg PE=1 SV=1 - [Q7ZY52_XENLA]	47.15	4	8	11	30	1	29	29	333	35.8122	8.04541
F7DFH2	krt59	Keratin 59	Xenopus tropicalis	Keratin 59 OS=Xenopus tropicalis OX=8364 GN=krt59 PE=3 SV=4 - [F7DFH2_XENTR]	10.64	12	2	6	59	2	57	28.5	517	56.8814	8.06006
A0A1L8FG57	eno1.S	2-phospho-D-glycerate hydro-lyase	Xenopus laevis	2-phospho-D-glycerate hydro-lyase OS=Xenopus laevis OX=8355 GN=eno1.S PE=1 SV=1 - [A0A1L8FG57_XENLA]	66.59	8	4	26	116	4	112	28	434	47.3844	6.56592
A0A1L8HMU9	XELAEV_18009640mg	Tr-type G domain-containing protein	Xenopus laevis	Tr-type G domain-containing protein OS=Xenopus laevis OX=8355 GN=XELAEV_18009640mg PE=1 SV=1 - [A0A1L8HMU9_XENLA]	28.13	8	5	18	29	1	28	28	846	94.0582	6.82959
A0A1L8HEI6	tuba5.L	Tubulin alpha chain	Xenopus laevis	Tubulin alpha chain OS=Xenopus laevis OX=8355 GN=tuba5.L PE=3 SV=1 - [A0A1L8HEI6_XENLA]	35.63	1	1	12	29	1	28	28	449	49.9475	5.14795
Q7ZXP8	eef2.1.L	Eef2-prov protein	Xenopus laevis	Eef2-prov protein OS=Xenopus laevis OX=8355 GN=eef2.1.L PE=1 SV=1 - [Q7ZXP8_XENLA]	21.68	4	2	15	26	1	25	25	858	95.3659	6.93213
F7D9C1	krt7	Keratin 7	Xenopus tropicalis	Keratin 7 OS=Xenopus tropicalis OX=8364 GN=krt7 PE=3 SV=3 - [F7D9C1_XENTR]	14.79	23	1	10	77	3	74	24.6667	507	54.7345	5.8335
A0A1L8FX33	XELAEV_18031324mg	Succinate dehydrogenase [ubiquinone] flavoprotein subunit, mitochondrial	Xenopus laevis	Succinate dehydrogenase [ubiquinone] flavoprotein subunit, mitochondrial OS=Xenopus laevis OX=8355 GN=XELAEV_18031324mg PE=1 SV=1 - [A0A1L8FX33_XENLA]	31.44	8	6	13	23	1	22	22	722	79.1834	7.66455
A0A1L8EX90	hspd1.L	60 kDa chaperonin	Xenopus laevis	60 kDa chaperonin OS=Xenopus laevis OX=8355 GN=hspd1.L PE=1 SV=1 - [A0A1L8EX90_XENLA]	33.51	10	13	13	21	1	20	20	576	61.5427	6.30322
Q7SYX2	serpinb6.L	MGC64421 protein	Xenopus laevis	MGC64421 protein OS=Xenopus laevis OX=8355 GN=serpinb6.L PE=1 SV=1 - [Q7SYX2_XENLA]	56.2	4	10	13	40	2	38	19	379	42.7863	5.84619
A0A1L8F2B5	rps4x.S	40S ribosomal protein S4	Xenopus laevis	40S ribosomal protein S4 OS=Xenopus laevis OX=8355 GN=rps4x.S PE=1 SV=1 - [A0A1L8F2B5_XENLA]	47.15	2	11	11	20	1	19	19	263	29.646	10.1548
A0A1L8HBT8	XELAEV_18011255mg	Cystatin domain-containing protein	Xenopus laevis	Cystatin domain-containing protein OS=Xenopus laevis OX=8355 GN=XELAEV_18011255mg PE=3 SV=1 - [A0A1L8HBT8_XENLA]	43.56	2	4	4	20	1	19	19	101	11.2296	7.32764
A0A1L8F9K5	XELAEV_18039573mg	SERPIN domain-containing protein	Xenopus laevis	SERPIN domain-containing protein OS=Xenopus laevis OX=8355 GN=XELAEV_18039573mg PE=3 SV=1 - [A0A1L8F9K5_XENLA]	27.06	2	9	9	18	1	17	17	436	49.4914	8.06006
Q6EE53	40S ribosomal protein S8 (Fragment) OS=Xenopus laevis OX=8355	40S ribosomal protein S8 (Fragment)	Xenopus laevis	40S ribosomal protein S8 (Fragment) OS=Xenopus laevis OX=8355 PE=2 SV=1 - [Q6EE53_XENLA]	39.68	7	7	7	17	1	16	16	189	21.7738	10.228
Q641I6	plin2.S	Perilipin	Xenopus laevis	Perilipin OS=Xenopus laevis OX=8355 GN=plin2.S PE=2 SV=1 - [Q641I6_XENLA]	35.15	1	6	10	16	1	15	15	404	44.3844	5.75732
Q7SZ23	gstm1.S	Glutathione transferase	Xenopus laevis	Glutathione transferase OS=Xenopus laevis OX=8355 GN=gstm1.S PE=1 SV=1 - [Q7SZ23_XENLA]	46.12	6	8	8	16	1	15	15	219	25.375	7.82568
Q6GQ64	XB5909790.S	MGC80314 protein	Xenopus laevis	MGC80314 protein OS=Xenopus laevis OX=8355 GN=XB5909790.S PE=2 SV=1 - [Q6GQ64_XENLA]	60.95	2	5	6	15	1	14	14	105	11.6559	5.03369
Q3KQ82	pfn1.L	Profilin	Xenopus laevis	Profilin OS=Xenopus laevis OX=8355 GN=pfn1.L PE=1 SV=1 - [Q3KQ82_XENLA]	48.55	1	4	5	15	1	14	14	138	14.9222	7.53271
A0A6I8SRE6	krt61	Keratin 61	Xenopus tropicalis	Keratin 61 OS=Xenopus tropicalis OX=8364 GN=krt61 PE=3 SV=2 - [A0A6I8SRE6_XENTR]	12.82	11	3	11	44	3	41	13.6667	577	60.2351	7.76709
A0A1L8FDX2	tpi1.S	Triosephosphate isomerase	Xenopus laevis	Triosephosphate isomerase OS=Xenopus laevis OX=8355 GN=tpi1.S PE=1 SV=1 - [A0A1L8FDX2_XENLA]	29.44	1	3	5	14	1	13	13	248	26.7448	7.35693
Q5BL42	hsp90ab1	Heat shock protein 90kDa alpha (Cytosolic), class B member 1	Xenopus tropicalis	Heat shock protein 90kDa alpha (Cytosolic), class B member 1 OS=Xenopus tropicalis OX=8364 GN=hsp90ab1 PE=2 SV=1 - [Q5BL42_XENTR]	19.36	24	7	11	14	1	13	13	723	83.1591	5.03369
Q6GNH1	rpl23.S	60S ribosomal protein L23	Xenopus laevis	60S ribosomal protein L23 OS=Xenopus laevis OX=8355 GN=rpl23.S PE=1 SV=1 - [Q6GNH1_XENLA]	46.43	4	6	6	13	1	12	12	140	14.842	10.5063
A0A6I8QKJ5	krt78.3	Keratin 78, gene 4	Xenopus tropicalis	Keratin 78, gene 4 OS=Xenopus tropicalis OX=8364 GN=krt78.3 PE=3 SV=2 - [A0A6I8QKJ5_XENTR]	5.65	9	1	3	13	1	12	12	513	56.6707	7.69385
B7ZSI2	lk-a	Lk-a protein	Xenopus laevis	Lk-a protein OS=Xenopus laevis OX=8355 GN=lk-a PE=2 SV=1 - [B7ZSI2_XENLA]	11.23	9	1	10	48	4	44	11	579	59.876	5.59229
A0A6I8Q7P8	krt61	Keratin 61	Xenopus tropicalis	Keratin 61 OS=Xenopus tropicalis OX=8364 GN=krt61 PE=3 SV=2 - [A0A6I8Q7P8_XENTR]	12.57	8	1	10	48	4	44	11	549	57.3349	5.70654
Q6PB22	habp4.L	MGC68500 protein	Xenopus laevis	MGC68500 protein OS=Xenopus laevis OX=8355 GN=habp4.L PE=2 SV=1 - [Q6PB22_XENLA]	27.72	7	6	6	11	1	10	10	404	45.5006	7.56201
A0A1L8G1Y2	XELAEV_18028947mg	CCT-alpha	Xenopus laevis	CCT-alpha OS=Xenopus laevis OX=8355 GN=XELAEV_18028947mg PE=3 SV=1 - [A0A1L8G1Y2_XENLA]	18.74	8	8	8	11	1	10	10	555	60.0604	6.31592
Q6GQB2	rpl7a.S	60S ribosomal protein L7a	Xenopus laevis	60S ribosomal protein L7a OS=Xenopus laevis OX=8355 GN=rpl7a.S PE=2 SV=1 - [Q6GQB2_XENLA]	16.17	11	4	4	9		9	infinity	266	29.8549	10.5356
Q6PCF1	slc25a13.L	MGC69168 protein	Xenopus laevis	MGC69168 protein OS=Xenopus laevis OX=8355 GN=slc25a13.L PE=1 SV=1 - [Q6PCF1_XENLA]	10.21	1	1	5	9		9	infinity	676	74.5988	8.6167
Q7ZYU0	rps6.L	40S ribosomal protein S6	Xenopus laevis	40S ribosomal protein S6 OS=Xenopus laevis OX=8355 GN=rps6.L PE=1 SV=1 - [Q7ZYU0_XENLA]	19.28	6	5	5	9		9	infinity	249	28.6909	10.9019
A0A1L8G5V1	rps27a.L	40S ribosomal protein S27a	Xenopus laevis	40S ribosomal protein S27a OS=Xenopus laevis OX=8355 GN=rps27a.L PE=3 SV=1 - [A0A1L8G5V1_XENLA]	33.97	24	4	4	9		9	infinity	156	17.9695	9.64209
A0A1L8FVA3	XELAEV_18030711mg	Pitrilysin metalloproteinase 1	Xenopus laevis	Pitrilysin metalloproteinase 1 OS=Xenopus laevis OX=8355 GN=XELAEV_18030711mg PE=1 SV=1 - [A0A1L8FVA3_XENLA]	9.64	5	8	8	9		9	infinity	1027	116.59	6.46826
A0A1L8FN22	XELAEV_18035949mg	60S ribosomal protein L28	Xenopus laevis	60S ribosomal protein L28 OS=Xenopus laevis OX=8355 GN=XELAEV_18035949mg PE=3 SV=1 - [A0A1L8FN22_XENLA]	18.25	8	1	3	9		9	infinity	137	15.5896	11.7515
Q7SYU5	Fructose-bisphosphate aldolase OS=Xenopus laevis OX=8355	Fructose-bisphosphate aldolase	Xenopus laevis	Fructose-bisphosphate aldolase OS=Xenopus laevis OX=8355 PE=2 SV=1 - [Q7SYU5_XENLA]	27.96	12	4	5	9		9	infinity	279	30.1986	8.06006
Q91384	XALD3	Fructose-bisphosphate aldolase	Xenopus laevis	Fructose-bisphosphate aldolase OS=Xenopus laevis OX=8355 GN=XALD3 PE=2 SV=2 - [Q91384_XENLA]	23.08	7	4	5	9		9	infinity	364	39.231	6.3667
A0A1L8HWM7	cirbp.L	RRM domain-containing protein	Xenopus laevis	RRM domain-containing protein OS=Xenopus laevis OX=8355 GN=cirbp.L PE=4 SV=1 - [A0A1L8HWM7_XENLA]	46.99	5	7	7	9		9	infinity	166	17.8923	9.17334
A0A1L8FFL0	XELAEV_18037282mg	60S ribosomal protein L21	Xenopus laevis	60S ribosomal protein L21 OS=Xenopus laevis OX=8355 GN=XELAEV_18037282mg PE=3 SV=1 - [A0A1L8FFL0_XENLA]	32.5	4	4	4	9		9	infinity	160	18.611	10.6089
A0A1L8HM82	ube2d3.S	UBC core domain-containing protein	Xenopus laevis	UBC core domain-containing protein OS=Xenopus laevis OX=8355 GN=ube2d3.S PE=1 SV=1 - [A0A1L8HM82_XENLA]	24.49	12	3	3	8		8	infinity	147	16.7244	7.82568
A0A1L8EPY1	kpna7.S	Importin subunit alpha	Xenopus laevis	Importin subunit alpha OS=Xenopus laevis OX=8355 GN=kpna7.S PE=1 SV=1 - [A0A1L8EPY1_XENLA]	12.64	6	2	4	8		8	infinity	522	57.652	5.41455
Q4V871	MGC114621	MGC114621 protein	Xenopus laevis	MGC114621 protein OS=Xenopus laevis OX=8355 GN=MGC114621 PE=2 SV=1 - [Q4V871_XENLA]	51.33	1	1	2	8		8	infinity	113	11.4657	4.24658
Q569T0	hdac10.L	MGC115178 protein	Xenopus laevis	MGC115178 protein OS=Xenopus laevis OX=8355 GN=hdac10.L PE=2 SV=1 - [Q569T0_XENLA]	10.69	4	6	6	8		8	infinity	683	76.6833	5.8335
Q640B9	LOC494706	LOC494706 protein (Fragment)	Xenopus laevis	LOC494706 protein (Fragment) OS=Xenopus laevis OX=8355 GN=LOC494706 PE=2 SV=1 - [Q640B9_XENLA]	16.8	6	3	3	8		8	infinity	244	27.0625	5.03369
Q6GPY3	prdx5.L	Peroxiredoxin-5	Xenopus laevis	Peroxiredoxin-5 OS=Xenopus laevis OX=8355 GN=prdx5.L PE=2 SV=1 - [Q6GPY3_XENLA]	39.15	7	5	5	8		8	infinity	189	20.0534	8.36768
Q6NTQ9	ndufa10.S	NADH dehydrogenase [ubiquinone] 1 alpha subcomplex subunit 10, mitochondrial	Xenopus laevis	NADH dehydrogenase [ubiquinone] 1 alpha subcomplex subunit 10, mitochondrial OS=Xenopus laevis OX=8355 GN=ndufa10.S PE=1 SV=1 - [Q6NTQ9_XENLA]	22.51	6	1	6	8		8	infinity	351	40.0301	6.69775
A0A1L8GM75	XELAEV_18023071mg	Alcohol dehydrogenase (NADP(+))	Xenopus laevis	Alcohol dehydrogenase (NADP(+)) OS=Xenopus laevis OX=8355 GN=XELAEV_18023071mg PE=1 SV=1 - [A0A1L8GM75_XENLA]	29.36	3	7	7	8		8	infinity	327	37.1191	7.13721
A0A1L8FR42	XELAEV_18032984mg	Uncharacterized protein	Xenopus laevis	Uncharacterized protein OS=Xenopus laevis OX=8355 GN=XELAEV_18032984mg PE=3 SV=1 - [A0A1L8FR42_XENLA]	10.73	7	1	5	8		8	infinity	643	71.016	8.52881
Q5XGR6	ndufa10.L	NADH dehydrogenase [ubiquinone] 1 alpha subcomplex subunit 10, mitochondrial	Xenopus laevis	NADH dehydrogenase [ubiquinone] 1 alpha subcomplex subunit 10, mitochondrial OS=Xenopus laevis OX=8355 GN=ndufa10.L PE=2 SV=1 - [Q5XGR6_XENLA]	21.37	6	1	6	8		8	infinity	351	40.002	6.85889
Q9PTK6	fatvg	Perilipin	Xenopus laevis	Perilipin OS=Xenopus laevis OX=8355 GN=fatvg PE=2 SV=1 - [Q9PTK6_XENLA]	14.95	5	1	5	8		8	infinity	408	44.6443	5.38916
A2BDA2	LOC100037080	40S ribosomal protein SA	Xenopus laevis	40S ribosomal protein SA OS=Xenopus laevis OX=8355 GN=LOC100037080 PE=2 SV=1 - [A2BDA2_XENLA]	26.78	1	1	5	7		7	infinity	295	32.8174	4.86865
A0A1L8H6H2	rpl8.S	60S ribosomal protein L8	Xenopus laevis	60S ribosomal protein L8 OS=Xenopus laevis OX=8355 GN=rpl8.S PE=3 SV=1 - [A0A1L8H6H2_XENLA]	14.01	3	4	4	7		7	infinity	257	27.9002	10.8872
A0A1L8HEF1	stmn1.L	Stathmin	Xenopus laevis	Stathmin OS=Xenopus laevis OX=8355 GN=stmn1.L PE=3 SV=1 - [A0A1L8HEF1_XENLA]	31.72	10	1	3	7		7	infinity	145	16.7788	7.23975
Q6GNF4	rps17.L	40S ribosomal protein S17	Xenopus laevis	40S ribosomal protein S17 OS=Xenopus laevis OX=8355 GN=rps17.L PE=2 SV=1 - [Q6GNF4_XENLA]	40.74	8	3	3	7		7	infinity	135	15.5144	9.84717
Q802B7	ndufs1.L	NADH-ubiquinone oxidoreductase 75 kDa subunit, mitochondrial	Xenopus laevis	NADH-ubiquinone oxidoreductase 75 kDa subunit, mitochondrial OS=Xenopus laevis OX=8355 GN=ndufs1.L PE=1 SV=1 - [Q802B7_XENLA]	10.73	8	6	6	7		7	infinity	727	79.5247	6.55127
Q66J07	nnt.L	Proton-translocating NAD(P)(+) transhydrogenase	Xenopus laevis	Proton-translocating NAD(P)(+) transhydrogenase OS=Xenopus laevis OX=8355 GN=nnt.L PE=1 SV=1 - [Q66J07_XENLA]	6.54	4	6	6	7		7	infinity	1086	113.927	7.06396
A0A1L8HWE8	gamt.L	Guanidinoacetate N-methyltransferase	Xenopus laevis	Guanidinoacetate N-methyltransferase OS=Xenopus laevis OX=8355 GN=gamt.L PE=1 SV=1 - [A0A1L8HWE8_XENLA]	17.17	2	2	3	7		7	infinity	233	26.6202	5.57959
A0A1L8HSP3	cct7.L	T-complex protein 1 subunit eta	Xenopus laevis	T-complex protein 1 subunit eta OS=Xenopus laevis OX=8355 GN=cct7.L PE=1 SV=1 - [A0A1L8HSP3_XENLA]	15.29	11	7	7	7		7	infinity	543	59.0697	6.34131
A0A1L8HDP1	XELAEV_18011887mg	14_3_3 domain-containing protein	Xenopus laevis	14_3_3 domain-containing protein OS=Xenopus laevis OX=8355 GN=XELAEV_18011887mg PE=3 SV=1 - [A0A1L8HDP1_XENLA]	12.45	11	1	3	7		7	infinity	233	26.4452	4.86865
A0A1L8H4S4	rpl23a.L	Ribosomal_L23eN domain-containing protein	Xenopus laevis	Ribosomal_L23eN domain-containing protein OS=Xenopus laevis OX=8355 GN=rpl23a.L PE=1 SV=1 - [A0A1L8H4S4_XENLA]	27.1	5	4	4	7		7	infinity	155	17.6631	10.3892
Q7SZ34	stmn1.S	Stathmin	Xenopus laevis	Stathmin OS=Xenopus laevis OX=8355 GN=stmn1.S PE=2 SV=1 - [Q7SZ34_XENLA]	32.41	11	2	4	7		7	infinity	145	16.7387	5.79541
Q0IHG1	rplp2.L	60S acidic ribosomal protein P2	Xenopus laevis	60S acidic ribosomal protein P2 OS=Xenopus laevis OX=8355 GN=rplp2.L PE=2 SV=1 - [Q0IHG1_XENLA]	50.43	3	3	3	7		7	infinity	115	11.6478	4.58936
D0EUZ9	Bcl9	B-cell lymphoma 9	Xenopus laevis	B-cell lymphoma 9 OS=Xenopus laevis OX=8355 GN=Bcl9 PE=2 SV=1 - [D0EUZ9_XENLA]	6.72	27	5	5	7		7	infinity	1473	156.547	9.01221
A0A6I8PMN9	rpsa	40S ribosomal protein SA	Xenopus tropicalis	40S ribosomal protein SA OS=Xenopus tropicalis OX=8364 GN=rpsa PE=3 SV=1 - [A0A6I8PMN9_XENTR]	23.39	5	2	5	7		7	infinity	295	32.8173	4.86865
A0A803JK12	sdhb	Succinate dehydrogenase [ubiquinone] iron-sulfur subunit, mitochondrial	Xenopus tropicalis	Succinate dehydrogenase [ubiquinone] iron-sulfur subunit, mitochondrial OS=Xenopus tropicalis OX=8364 GN=sdhb PE=4 SV=1 - [A0A803JK12_XENTR]	16.18	8	4	4	7		7	infinity	272	30.9392	8.22119
A0A803JMH6	rps27	Ribosomal protein S27	Xenopus tropicalis	Ribosomal protein S27 OS=Xenopus tropicalis OX=8364 GN=rps27 PE=4 SV=1 - [A0A803JMH6_XENTR]	38.55	8	1	3	7		7	infinity	83	9.35778	9.45166
Q6DTN6	ppia.L	Peptidyl-prolyl cis-trans isomerase	Xenopus laevis	Peptidyl-prolyl cis-trans isomerase OS=Xenopus laevis OX=8355 GN=ppia.L PE=2 SV=1 - [Q6DTN6_XENLA]	21.95	7	1	2	6		6	infinity	164	17.7088	8.74854
Q5XHJ8	gsn.S	Actin-depolymerizing factor	Xenopus laevis	Actin-depolymerizing factor OS=Xenopus laevis OX=8355 GN=gsn.S PE=1 SV=1 - [Q5XHJ8_XENLA]	10.01	6	5	5	6		6	infinity	729	80.4471	5.37646
Q6GQ98	crat.S	MGC80234 protein	Xenopus laevis	MGC80234 protein OS=Xenopus laevis OX=8355 GN=crat.S PE=2 SV=1 - [Q6GQ98_XENLA]	11.15	7	3	3	6		6	infinity	610	68.8373	7.1665
Q6IND5	vwa5a.2.L	MGC83495 protein	Xenopus laevis	MGC83495 protein OS=Xenopus laevis OX=8355 GN=vwa5a.2.L PE=2 SV=1 - [Q6IND5_XENLA]	8.13	15	5	5	6		6	infinity	861	94.4282	4.83057
Q6PAD4	tkt.L	MGC68785 protein	Xenopus laevis	MGC68785 protein OS=Xenopus laevis OX=8355 GN=tkt.L PE=2 SV=1 - [Q6PAD4_XENLA]	9.41	10	4	6	6		6	infinity	627	67.9679	7.7085
Q7ZYU4	XELAEV_18037805mg	40S ribosomal protein S9	Xenopus laevis	40S ribosomal protein S9 OS=Xenopus laevis OX=8355 GN=XELAEV_18037805mg PE=1 SV=1 - [Q7ZYU4_XENLA]	26.8	9	6	6	6		6	infinity	194	22.5636	10.5796
A0A1L8HCN3	XELAEV_18011525mg	CCT-theta	Xenopus laevis	CCT-theta OS=Xenopus laevis OX=8355 GN=XELAEV_18011525mg PE=3 SV=1 - [A0A1L8HCN3_XENLA]	11.17	10	5	5	6		6	infinity	546	59.3033	5.52881
A0A1L8H820	XELAEV_18015309mg	Uncharacterized protein	Xenopus laevis	Uncharacterized protein OS=Xenopus laevis OX=8355 GN=XELAEV_18015309mg PE=1 SV=1 - [A0A1L8H820_XENLA]	11.62	3	3	4	6		6	infinity	482	51.1233	8.68994
A0A1L8H748	sars1.S	Seryl-tRNA synthetase	Xenopus laevis	Seryl-tRNA synthetase OS=Xenopus laevis OX=8355 GN=sars1.S PE=1 SV=1 - [A0A1L8H748_XENLA]	14.48	5	5	5	6		6	infinity	511	58.3157	6.30322
A0A1L8GHL2	XELAEV_18025862mg	Uncharacterized protein	Xenopus laevis	Uncharacterized protein OS=Xenopus laevis OX=8355 GN=XELAEV_18025862mg PE=3 SV=1 - [A0A1L8GHL2_XENLA]	18.52	6	3	3	6		6	infinity	135	15.7707	11.3706
A0A1L8F4Y5	XELAEV_18042888mg	T-complex protein 1 subunit gamma	Xenopus laevis	T-complex protein 1 subunit gamma OS=Xenopus laevis OX=8355 GN=XELAEV_18042888mg PE=1 SV=1 - [A0A1L8F4Y5_XENLA]	12.01	5	4	4	6		6	infinity	508	56.3663	6.21436
A0A1L8EQX4	XELAEV_18047771mg	40S ribosomal protein S2	Xenopus laevis	40S ribosomal protein S2 OS=Xenopus laevis OX=8355 GN=XELAEV_18047771mg PE=3 SV=1 - [A0A1L8EQX4_XENLA]	14.23	6	3	3	6		6	infinity	281	30.2851	10.1548
A0A310UEC1	rpl11.S	60S ribosomal protein L11	Xenopus laevis	60S ribosomal protein L11 OS=Xenopus laevis OX=8355 GN=rpl11.S PE=1 SV=1 - [A0A310UEC1_XENLA]	18.56	8	3	3	6		6	infinity	167	19.0212	9.92041
Q6EE52	60S ribosomal protein L13 (Fragment) OS=Xenopus laevis OX=8355	60S ribosomal protein L13 (Fragment)	Xenopus laevis	60S ribosomal protein L13 (Fragment) OS=Xenopus laevis OX=8355 PE=2 SV=1 - [Q6EE52_XENLA]	20.79	5	3	3	6		6	infinity	178	20.3256	11.7954
A0A6I8Q5B3	rangrf	RAN guanine nucleotide release factor	Xenopus tropicalis	RAN guanine nucleotide release factor OS=Xenopus tropicalis OX=8364 GN=rangrf PE=3 SV=2 - [A0A6I8Q5B3_XENTR]	12.25	6	3	3	6		6	infinity	302	33.3321	9.53955
Q9PSN9	Lipovitellin 1, PCDZN=ZN(2+)- and CD(2+)-binding protein (Fragments) OS=Xenopus laevis OX=8355	Lipovitellin 1, PCDZN=ZN(2+)- and CD(2+)-binding protein (Fragments)	Xenopus laevis	Lipovitellin 1, PCDZN=ZN(2+)- and CD(2+)-binding protein (Fragments) OS=Xenopus laevis OX=8355 PE=1 SV=1 - [Q9PSN9_XENLA]	56.82	1	1	3	6		6	infinity	44	5.25473	4.89404
A0A1L8F516	rps27.S	40S ribosomal protein S27	Xenopus laevis	40S ribosomal protein S27 OS=Xenopus laevis OX=8355 GN=rps27.S PE=3 SV=1 - [A0A1L8F516_XENLA]	38.1	7	1	3	6		6	infinity	84	9.46885	9.45166
Q0IH65	XB5733004.L	LOC733268 protein	Xenopus laevis	LOC733268 protein OS=Xenopus laevis OX=8355 GN=XB5733004.L PE=2 SV=1 - [Q0IH65_XENLA]	18.44	2	2	2	6		6	infinity	244	26.5123	4.81787
Q4FZP3	cox6a1.L	Cytochrome c oxidase subunit	Xenopus laevis	Cytochrome c oxidase subunit OS=Xenopus laevis OX=8355 GN=cox6a1.L PE=2 SV=1 - [Q4FZP3_XENLA]	26.13	5	2	2	6		6	infinity	111	12.3474	9.24658
Q5PQ49	mgst3.L	LOC495981 protein	Xenopus laevis	LOC495981 protein OS=Xenopus laevis OX=8355 GN=mgst3.L PE=1 SV=1 - [Q5PQ49_XENLA]	21.77	4	3	3	6		6	infinity	147	16.2124	9.39307
A0A1L8HCL3	sod1.L	Superoxide dismutase [Cu-Zn]	Xenopus laevis	Superoxide dismutase [Cu-Zn] OS=Xenopus laevis OX=8355 GN=sod1.L PE=3 SV=1 - [A0A1L8HCL3_XENLA]	37.75	2	4	4	5		5	infinity	151	15.4085	5.89697
Q28I74	rps13	40S ribosomal protein S13	Xenopus tropicalis	40S ribosomal protein S13 OS=Xenopus tropicalis OX=8364 GN=rps13 PE=2 SV=1 - [Q28I74_XENTR]	13.25	4	3	3	5		5	infinity	151	17.2397	10.6089
Q7SZA8	rpl18.L	Rpl18-b protein	Xenopus laevis	Rpl18-b protein OS=Xenopus laevis OX=8355 GN=rpl18.L PE=2 SV=1 - [Q7SZA8_XENLA]	20.21	2	1	3	5		5	infinity	188	21.6101	11.7075
Q6P699	rplp1.L	MGC68562 protein	Xenopus laevis	MGC68562 protein OS=Xenopus laevis OX=8355 GN=rplp1.L PE=1 SV=1 - [Q6P699_XENLA]	51.33	1	1	2	5		5	infinity	113	11.4366	4.28467
Q7ZSY1	lgals3.L	Galectin	Xenopus laevis	Galectin OS=Xenopus laevis OX=8355 GN=lgals3.L PE=2 SV=1 - [Q7ZSY1_XENLA]	20.69	2	4	4	5		5	infinity	261	28.3141	6.78564
Q7ZX88	snd1.S	Staphylococcal nuclease domain-containing protein	Xenopus laevis	Staphylococcal nuclease domain-containing protein OS=Xenopus laevis OX=8355 GN=snd1.S PE=2 SV=1 - [Q7ZX88_XENLA]	6.73	14	5	5	5		5	infinity	906	101.379	6.87354
A0A1L8GYF6	XELAEV_18017507mg	60S ribosomal protein L18a	Xenopus laevis	60S ribosomal protein L18a OS=Xenopus laevis OX=8355 GN=XELAEV_18017507mg PE=3 SV=1 - [A0A1L8GYF6_XENLA]	30.61	11	4	4	5		5	infinity	147	17.4443	10.9165
A0A310U4X8	XELAEV_18000200mg	Glyceraldehyde-3-phosphate dehydrogenase (Fragment)	Xenopus laevis	Glyceraldehyde-3-phosphate dehydrogenase (Fragment) OS=Xenopus laevis OX=8355 GN=XELAEV_18000200mg PE=3 SV=1 - [A0A310U4X8_XENLA]	15.99	1	3	3	5		5	infinity	294	31.4182	8.99756
Q3KPV0	akr7a2.L	MGC131303 protein	Xenopus laevis	MGC131303 protein OS=Xenopus laevis OX=8355 GN=akr7a2.L PE=2 SV=1 - [Q3KPV0_XENLA]	13.81	3	4	4	5		5	infinity	333	37.8368	7.07861
A0A803JJ57	mcm5	DNA replication licensing factor mcm5	Xenopus tropicalis	DNA replication licensing factor mcm5 OS=Xenopus tropicalis OX=8364 GN=mcm5 PE=4 SV=1 - [A0A803JJ57_XENTR]	10.48	5	5	5	5		5	infinity	687	77.5688	8.55811
A0A6I8RYR5	etfa	Electron transfer flavoprotein subunit alpha	Xenopus tropicalis	Electron transfer flavoprotein subunit alpha OS=Xenopus tropicalis OX=8364 GN=etfa PE=3 SV=1 - [A0A6I8RYR5_XENTR]	17.93	7	4	4	5		5	infinity	329	34.7322	8.04541
Q6P2W6	tubb4	Elongation factor Tu (Fragment)	Xenopus tropicalis	Elongation factor Tu (Fragment) OS=Xenopus tropicalis OX=8364 GN=tubb4 PE=2 SV=1 - [Q6P2W6_XENTR]	7.1	3	3	3	5		5	infinity	451	49.4104	6.84424
A0A6I8RYD8	kpnb1	Karyopherin (importin) beta 1	Xenopus tropicalis	Karyopherin (importin) beta 1 OS=Xenopus tropicalis OX=8364 GN=kpnb1 PE=3 SV=2 - [A0A6I8RYD8_XENTR]	5.31	6	4	4	5		5	infinity	848	94.1435	4.86865
A0A803KCX3	Uncharacterized protein OS=Xenopus tropicalis OX=8364	Uncharacterized protein	Xenopus tropicalis	Uncharacterized protein OS=Xenopus tropicalis OX=8364 PE=4 SV=1 - [A0A803KCX3_XENTR]	25.4	55	2	2	5		5	infinity	126	13.5266	10.7261
A0A7D9NJS8	csde1	Isocitrate dehydrogenase [NAD] subunit, mitochondrial	Xenopus tropicalis	Isocitrate dehydrogenase [NAD] subunit, mitochondrial OS=Xenopus tropicalis OX=8364 GN=csde1 PE=3 SV=2 - [A0A7D9NJS8_XENTR]	10.96	10	1	3	5		5	infinity	356	39.6844	8.52881
Q6DEP8	rpl30	60S ribosomal protein L30	Xenopus tropicalis	60S ribosomal protein L30 OS=Xenopus tropicalis OX=8364 GN=rpl30 PE=2 SV=1 - [Q6DEP8_XENTR]	50.86	7	4	4	5		5	infinity	116	12.9038	9.62744
A0A1L8F736	gatd3alc.1.L	Uncharacterized protein	Xenopus laevis	Uncharacterized protein OS=Xenopus laevis OX=8355 GN=gatd3alc.1.L PE=4 SV=1 - [A0A1L8F736_XENLA]	20.44	6	4	4	5		5	infinity	225	24.1233	7.13721
Q68F82	rpl12	60S ribosomal protein L12	Xenopus tropicalis	60S ribosomal protein L12 OS=Xenopus tropicalis OX=8364 GN=rpl12 PE=2 SV=1 - [Q68F82_XENTR]	36.6	10	4	4	5		5	infinity	153	16.3978	9.5249
A0A1L8ERX6	rpl19.L	Ribosomal protein L19	Xenopus laevis	Ribosomal protein L19 OS=Xenopus laevis OX=8355 GN=rpl19.L PE=3 SV=1 - [A0A1L8ERX6_XENLA]	13.2	3	2	2	4		4	infinity	197	23.4662	11.4731
A1L3K3	LOC100037031	LOC100037031 protein (Fragment)	Xenopus laevis	LOC100037031 protein (Fragment) OS=Xenopus laevis OX=8355 GN=LOC100037031 PE=2 SV=1 - [A1L3K3_XENLA]	19.33	14	1	4	4		4	infinity	269	30.3202	4.7417
Q6AZL9	rps23.S	40S ribosomal protein S23	Xenopus laevis	40S ribosomal protein S23 OS=Xenopus laevis OX=8355 GN=rps23.S PE=1 SV=1 - [Q6AZL9_XENLA]	21.68	3	4	4	4		4	infinity	143	15.7587	10.4771
Q6DCF9	anxa7.L	Annexin	Xenopus laevis	Annexin OS=Xenopus laevis OX=8355 GN=anxa7.L PE=2 SV=1 - [Q6DCF9_XENLA]	5.96	7	3	3	4		4	infinity	520	53.9634	7.1665
Q7ZTM0	cct5.S	CCT-epsilon	Xenopus laevis	CCT-epsilon OS=Xenopus laevis OX=8355 GN=cct5.S PE=2 SV=1 - [Q7ZTM0_XENLA]	9.8	6	1	3	4		4	infinity	541	59.55	6.13818
Q7SZA4	rpl18.S	MGC64315 protein	Xenopus laevis	MGC64315 protein OS=Xenopus laevis OX=8355 GN=rpl18.S PE=2 SV=1 - [Q7SZA4_XENLA]	20.21	6	1	3	4		4	infinity	188	21.536	11.7075
Q66IN5	XB5768883.L	MGC86492 protein	Xenopus laevis	MGC86492 protein OS=Xenopus laevis OX=8355 GN=XB5768883.L PE=2 SV=1 - [Q66IN5_XENLA]	10.71	1	3	3	4		4	infinity	644	70.1828	4.32275
Q66KP7	rps28p9.L	40S ribosomal protein S28	Xenopus laevis	40S ribosomal protein S28 OS=Xenopus laevis OX=8355 GN=rps28p9.L PE=2 SV=1 - [Q66KP7_XENLA]	56.52	3	4	4	4		4	infinity	69	7.8332	10.6968
A0A1L8HVG4	shroom3.L	Uncharacterized protein	Xenopus laevis	Uncharacterized protein OS=Xenopus laevis OX=8355 GN=shroom3.L PE=3 SV=1 - [A0A1L8HVG4_XENLA]	1.68	11	3	3	4		4	infinity	1788	200.596	7.21045
A0A1L8HNB7	ndufa7.S	Complex I-B14.5a	Xenopus laevis	Complex I-B14.5a OS=Xenopus laevis OX=8355 GN=ndufa7.S PE=3 SV=1 - [A0A1L8HNB7_XENLA]	24.44	5	1	3	4		4	infinity	135	14.7397	10.2134
A0A1L8FZB2	XELAEV_18032136mg	Uncharacterized protein	Xenopus laevis	Uncharacterized protein OS=Xenopus laevis OX=8355 GN=XELAEV_18032136mg PE=3 SV=1 - [A0A1L8FZB2_XENLA]	17.59	3	2	2	4		4	infinity	108	11.9623	9.42236
A0A1L8FNR9	rps19.L	40S ribosomal protein S19	Xenopus laevis	40S ribosomal protein S19 OS=Xenopus laevis OX=8355 GN=rps19.L PE=3 SV=1 - [A0A1L8FNR9_XENLA]	24.83	6	4	4	4		4	infinity	145	16.0496	10.4185
A0A1L8FJX9	XELAEV_18034852mg	Inorganic diphosphatase	Xenopus laevis	Inorganic diphosphatase OS=Xenopus laevis OX=8355 GN=XELAEV_18034852mg PE=3 SV=1 - [A0A1L8FJX9_XENLA]	12.11	7	3	3	4		4	infinity	289	33.0105	5.47803
A0A1L8EWY3	XELAEV_18044959mg	Elongation factor 1-beta	Xenopus laevis	Elongation factor 1-beta OS=Xenopus laevis OX=8355 GN=XELAEV_18044959mg PE=1 SV=1 - [A0A1L8EWY3_XENLA]	12.33	11	1	2	4		4	infinity	227	25.1316	4.7417
A0AUT4	LOC100036778	CCT-epsilon	Xenopus laevis	CCT-epsilon OS=Xenopus laevis OX=8355 GN=LOC100036778 PE=2 SV=1 - [A0AUT4_XENLA]	9.38	7	1	3	4		4	infinity	533	58.6083	6.49365
F7ABN1	sgk1	Chaperonin containing TCP1 subunit 6A	Xenopus tropicalis	Chaperonin containing TCP1 subunit 6A OS=Xenopus tropicalis OX=8364 GN=sgk1 PE=3 SV=3 - [F7ABN1_XENTR]	7.8	6	3	3	4		4	infinity	487	53.2951	7.48877
A0A7D9NLJ1	pdlim4	Hydroxysteroid dehydrogenase-like protein 2	Xenopus tropicalis	Hydroxysteroid dehydrogenase-like protein 2 OS=Xenopus tropicalis OX=8364 GN=pdlim4 PE=4 SV=2 - [A0A7D9NLJ1_XENTR]	8.33	1	2	2	4		4	infinity	384	40.7259	6.87354
A0A1B8Y853	XENTR_v90029512mg	Histone H4	Xenopus tropicalis	Histone H4 OS=Xenopus tropicalis OX=8364 GN=XENTR_v90029512mg PE=3 SV=1 - [A0A1B8Y853_XENTR]	14.72	26	3	3	4		4	infinity	231	25.5371	10.7993
F6TE47	lpcat1	Ribosomal protein L24	Xenopus tropicalis	Ribosomal protein L24 OS=Xenopus tropicalis OX=8364 GN=lpcat1 PE=3 SV=3 - [F6TE47_XENTR]	21.9	8	3	3	4		4	infinity	137	15.9707	10.7847
A0A1B8XT51	XENTR_v90029271mg	40S ribosomal protein S25 (Fragment)	Xenopus tropicalis	40S ribosomal protein S25 (Fragment) OS=Xenopus tropicalis OX=8364 GN=XENTR_v90029271mg PE=3 SV=1 - [A0A1B8XT51_XENTR]	26.47	2	2	2	4		4	infinity	68	7.69143	10.0669
Q28IZ0	aifm1	Apoptosis-inducing factor, mitochondria-associated 1	Xenopus tropicalis	Apoptosis-inducing factor, mitochondria-associated 1 OS=Xenopus tropicalis OX=8364 GN=aifm1 PE=2 SV=1 - [Q28IZ0_XENTR]	6.6	3	3	3	4		4	infinity	636	69.4346	6.93213
Q6DDS8	N1	N1/N2 protein	Xenopus laevis	N1/N2 protein OS=Xenopus laevis OX=8355 GN=N1 PE=2 SV=1 - [Q6DDS8_XENLA]	10.05	4	3	3	4		4	infinity	418	45.8291	4.50049
A2VDE6	LOC100037235	Thioredoxin	Xenopus laevis	Thioredoxin OS=Xenopus laevis OX=8355 GN=LOC100037235 PE=1 SV=1 - [A2VDE6_XENLA]	37.14	1	2	3	4		4	infinity	105	11.8569	5.05908
A0A1L8GJV4	XELAEV_18022248mg	Uncharacterized protein	Xenopus laevis	Uncharacterized protein OS=Xenopus laevis OX=8355 GN=XELAEV_18022248mg PE=1 SV=1 - [A0A1L8GJV4_XENLA]	9.4	5	3	3	4		4	infinity	436	49.8312	7.38623
Q66KV2	rpl38.L	60S ribosomal protein L38	Xenopus laevis	60S ribosomal protein L38 OS=Xenopus laevis OX=8355 GN=rpl38.L PE=2 SV=1 - [Q66KV2_XENLA]	28.57	6	2	2	4		4	infinity	70	8.20072	10.0522
A0A1L8ELW9	cox4i2.S	Cytochrome c oxidase subunit 4	Xenopus laevis	Cytochrome c oxidase subunit 4 OS=Xenopus laevis OX=8355 GN=cox4i2.S PE=3 SV=1 - [A0A1L8ELW9_XENLA]	20.69	3	2	2	4		4	infinity	174	20.5326	9.36377
Q66KG8	crkl.L	MGC84382 protein	Xenopus laevis	MGC84382 protein OS=Xenopus laevis OX=8355 GN=crkl.L PE=2 SV=1 - [Q66KG8_XENLA]	12.25	6	1	2	3		3	infinity	302	33.568	6.65381
Q6NTZ1	crkl.S	MGC81407 protein	Xenopus laevis	MGC81407 protein OS=Xenopus laevis OX=8355 GN=crkl.S PE=1 SV=1 - [Q6NTZ1_XENLA]	12.25	6	1	2	3		3	infinity	302	33.622	6.65381
Q05BI7	MGC64447	Prohibitin	Xenopus laevis	Prohibitin OS=Xenopus laevis OX=8355 GN=MGC64447 PE=2 SV=1 - [Q05BI7_XENLA]	11.76	6	3	3	3		3	infinity	255	27.8787	5.2876
Q6DFI3	mpst.L	Tst-prov protein	Xenopus laevis	Tst-prov protein OS=Xenopus laevis OX=8355 GN=mpst.L PE=2 SV=1 - [Q6DFI3_XENLA]	11.37	7	3	3	3		3	infinity	299	33.6856	6.7417
Q6DJQ0	rpl26.L	KOW domain-containing protein	Xenopus laevis	KOW domain-containing protein OS=Xenopus laevis OX=8355 GN=rpl26.L PE=1 SV=1 - [Q6DJQ0_XENLA]	12.41	3	2	2	3		3	infinity	145	17.1795	10.5503
Q6GQC6	rplp2.S	60S acidic ribosomal protein P2	Xenopus laevis	60S acidic ribosomal protein P2 OS=Xenopus laevis OX=8355 GN=rplp2.S PE=1 SV=1 - [Q6GQC6_XENLA]	21.74	1	2	2	3		3	infinity	115	11.6247	4.50049
Q7ZTK9	got1.S	Aspartate aminotransferase	Xenopus laevis	Aspartate aminotransferase OS=Xenopus laevis OX=8355 GN=got1.S PE=1 SV=1 - [Q7ZTK9_XENLA]	9.98	6	3	3	3		3	infinity	411	46.0412	7.44482
Q7ZX44	txndc5.L	Txndc5-prov protein	Xenopus laevis	Txndc5-prov protein OS=Xenopus laevis OX=8355 GN=txndc5.L PE=2 SV=1 - [Q7ZX44_XENLA]	8.44	2	2	3	3		3	infinity	403	45.8596	6.17627
Q7ZXG3	eif5a.L	Eukaryotic translation initiation factor 5A	Xenopus laevis	Eukaryotic translation initiation factor 5A OS=Xenopus laevis OX=8355 GN=eif5a.L PE=1 SV=1 - [Q7ZXG3_XENLA]	12.34	5	2	2	3		3	infinity	154	16.6933	5.80811
Q7SZB0	rpl35a.S	60S ribosomal protein L35a	Xenopus laevis	60S ribosomal protein L35a OS=Xenopus laevis OX=8355 GN=rpl35a.S PE=2 SV=1 - [Q7SZB0_XENLA]	16.36	3	2	2	3		3	infinity	110	12.5406	10.8726
A0A1L8HD77	XELAEV_18011715mg	SMB domain-containing protein	Xenopus laevis	SMB domain-containing protein OS=Xenopus laevis OX=8355 GN=XELAEV_18011715mg PE=4 SV=1 - [A0A1L8HD77_XENLA]	9.83	8	3	3	3		3	infinity	356	41.6564	8.55811
A0A1L8HAX7	XELAEV_18016290mg	Uncharacterized protein	Xenopus laevis	Uncharacterized protein OS=Xenopus laevis OX=8355 GN=XELAEV_18016290mg PE=1 SV=1 - [A0A1L8HAX7_XENLA]	8.33	5	2	2	3		3	infinity	420	44.0607	8.55811
A0A1L8GT45	XELAEV_18020716mg	Uncharacterized protein	Xenopus laevis	Uncharacterized protein OS=Xenopus laevis OX=8355 GN=XELAEV_18020716mg PE=1 SV=1 - [A0A1L8GT45_XENLA]	4.08	4	1	1	3		3	infinity	319	34.4075	7.12256
Q66KW1	rpl29.S	60S ribosomal protein L29	Xenopus laevis	60S ribosomal protein L29 OS=Xenopus laevis OX=8355 GN=rpl29.S PE=2 SV=1 - [Q66KW1_XENLA]	16	1	1	1	3		3	infinity	75	8.56559	11.605
A0A1L8GGG0	XELAEV_18025391mg	Ribosomal_L18_c domain-containing protein	Xenopus laevis	Ribosomal_L18_c domain-containing protein OS=Xenopus laevis OX=8355 GN=XELAEV_18025391mg PE=3 SV=1 - [A0A1L8GGG0_XENLA]	9.45	6	2	2	3		3	infinity	275	31.3192	9.26123
A0A1L8G5L9	XELAEV_18030252mg	Enoyl-CoA hydratase	Xenopus laevis	Enoyl-CoA hydratase OS=Xenopus laevis OX=8355 GN=XELAEV_18030252mg PE=1 SV=1 - [A0A1L8G5L9_XENLA]	5.63	3	3	3	3		3	infinity	746	80.7875	8.93896
A8WH57	cpvl.L	LOC100127263 protein	Xenopus laevis	LOC100127263 protein OS=Xenopus laevis OX=8355 GN=cpvl.L PE=1 SV=1 - [A8WH57_XENLA]	8.11	1	3	3	3		3	infinity	481	54.4749	5.42725
A0A1L8FV38	XELAEV_18030618mg	Diadenosine tetraphosphate synthetase	Xenopus laevis	Diadenosine tetraphosphate synthetase OS=Xenopus laevis OX=8355 GN=XELAEV_18030618mg PE=1 SV=1 - [A0A1L8FV38_XENLA]	4.02	7	3	3	3		3	infinity	747	84.2022	7.32764
A0A1L8FS49	txndc5.S	Uncharacterized protein	Xenopus laevis	Uncharacterized protein OS=Xenopus laevis OX=8355 GN=txndc5.S PE=1 SV=1 - [A0A1L8FS49_XENLA]	9.16	5	2	3	3		3	infinity	404	45.9047	5.94775
A0A1L8FGR5	isoc2.S	Isochorismatase domain-containing protein	Xenopus laevis	Isochorismatase domain-containing protein OS=Xenopus laevis OX=8355 GN=isoc2.S PE=1 SV=1 - [A0A1L8FGR5_XENLA]	16.02	1	3	3	3		3	infinity	231	25.5253	7.72314
A0AUT2	usp5.S	Ubiquitin carboxyl-terminal hydrolase	Xenopus laevis	Ubiquitin carboxyl-terminal hydrolase OS=Xenopus laevis OX=8355 GN=usp5.S PE=1 SV=1 - [A0AUT2_XENLA]	5.17	6	3	3	3		3	infinity	832	92.9137	5.22412
A0A1L8ET41	XELAEV_18043568mg	OGFr_N domain-containing protein	Xenopus laevis	OGFr_N domain-containing protein OS=Xenopus laevis OX=8355 GN=XELAEV_18043568mg PE=1 SV=1 - [A0A1L8ET41_XENLA]	8.5	1	2	2	3		3	infinity	718	83.0547	4.76709
A0A1L8ERQ6	XELAEV_18043110mg	IF rod domain-containing protein	Xenopus laevis	IF rod domain-containing protein OS=Xenopus laevis OX=8355 GN=XELAEV_18043110mg PE=3 SV=1 - [A0A1L8ERQ6_XENLA]	6.07	6	2	2	3		3	infinity	412	45.3347	5.10986
B7ZS76	LOC398083	LOC398083 protein	Xenopus laevis	LOC398083 protein OS=Xenopus laevis OX=8355 GN=LOC398083 PE=2 SV=1 - [B7ZS76_XENLA]	2.5	19	3	3	3		3	infinity	1962	226.556	5.5415
A5D8M8	nqo1.L	LOC100049751 protein	Xenopus laevis	LOC100049751 protein OS=Xenopus laevis OX=8355 GN=nqo1.L PE=2 SV=1 - [A5D8M8_XENLA]	15.11	2	3	3	3		3	infinity	278	31.0324	7.09326
Q5XHE0	taldo1.L	Transaldolase	Xenopus laevis	Transaldolase OS=Xenopus laevis OX=8355 GN=taldo1.L PE=2 SV=1 - [Q5XHE0_XENLA]	6.8	6	2	2	3		3	infinity	338	37.7065	6.21436
Q7SYP5	PdhE1beta-1	Pyruvate dehydrogenase E1 component subunit beta (Fragment)	Xenopus laevis	Pyruvate dehydrogenase E1 component subunit beta (Fragment) OS=Xenopus laevis OX=8355 GN=PdhE1beta-1 PE=2 SV=1 - [Q7SYP5_XENLA]	14.44	6	3	3	3		3	infinity	270	28.9827	5.84619
Q6EE54	Ribosomal protein (Fragment) OS=Xenopus laevis OX=8355	Ribosomal protein (Fragment)	Xenopus laevis	Ribosomal protein (Fragment) OS=Xenopus laevis OX=8355 PE=2 SV=1 - [Q6EE54_XENLA]	11.96	7	3	3	3		3	infinity	184	20.8556	9.68604
B1WBI5	prmt5	Protein arginine N-methyltransferase 5 (Fragment)	Xenopus tropicalis	Protein arginine N-methyltransferase 5 (Fragment) OS=Xenopus tropicalis OX=8364 GN=prmt5 PE=2 SV=1 - [B1WBI5_XENTR]	4.13	8	3	3	3		3	infinity	629	71.8673	6.37939
A0A803KKB0	LOC496939	Hypothetical LOC496939	Xenopus tropicalis	Hypothetical LOC496939 OS=Xenopus tropicalis OX=8364 GN=LOC496939 PE=2 SV=1 - [A0A803KKB0_XENTR]	8.7	19	1	2	3		3	infinity	253	27.995	4.729
A0A6I8R5M2	rpl31	60S ribosomal protein L31	Xenopus tropicalis	60S ribosomal protein L31 OS=Xenopus tropicalis OX=8364 GN=rpl31 PE=3 SV=1 - [A0A6I8R5M2_XENTR]	18.4	5	2	2	3		3	infinity	125	14.5722	10.7993
A0A1B8Y9E6	XENTR_v90028522mg	IF rod domain-containing protein	Xenopus tropicalis	IF rod domain-containing protein OS=Xenopus tropicalis OX=8364 GN=XENTR_v90028522mg PE=3 SV=1 - [A0A1B8Y9E6_XENTR]	1.93	2	1	1	3		3	infinity	414	46.5906	5.07178
A0A6I8R7V8	pfkm	ATP-dependent 6-phosphofructokinase	Xenopus tropicalis	ATP-dependent 6-phosphofructokinase OS=Xenopus tropicalis OX=8364 GN=pfkm PE=3 SV=2 - [A0A6I8R7V8_XENTR]	3.69	10	3	3	3		3	infinity	758	82.9652	7.84033
A0A6I8RV38	trap1	TNF receptor-associated protein 1	Xenopus tropicalis	TNF receptor-associated protein 1 OS=Xenopus tropicalis OX=8364 GN=trap1 PE=3 SV=2 - [A0A6I8RV38_XENTR]	3.03	5	1	2	3		3	infinity	692	78.5091	6.354
A0A803JG85	Uncharacterized protein OS=Xenopus tropicalis OX=8364	Uncharacterized protein	Xenopus tropicalis	Uncharacterized protein OS=Xenopus tropicalis OX=8364 PE=4 SV=1 - [A0A803JG85_XENTR]	7.2	72	2	2	3		3	infinity	125	13.6507	7.38623
A0A6I8QA06	ostc	Oligosaccharyltransferase complex subunit	Xenopus tropicalis	Oligosaccharyltransferase complex subunit OS=Xenopus tropicalis OX=8364 GN=ostc PE=3 SV=1 - [A0A6I8QA06_XENTR]	8.33	2	1	1	3		3	infinity	144	16.2785	9.17334
A0A1B8Y9N0	XENTR_v90028292mg	Uncharacterized protein	Xenopus tropicalis	Uncharacterized protein OS=Xenopus tropicalis OX=8364 GN=XENTR_v90028292mg PE=3 SV=1 - [A0A1B8Y9N0_XENTR]	5.5	6	2	2	3		3	infinity	400	42.8299	8.83643
A0A803JV86	ppp2r2a	Protein phosphatase 2 regulatory subunit B, alpha	Xenopus tropicalis	Protein phosphatase 2 regulatory subunit B, alpha OS=Xenopus tropicalis OX=8364 GN=ppp2r2a PE=4 SV=1 - [A0A803JV86_XENTR]	7.6	32	3	3	3		3	infinity	421	49.1183	6.87354
Q6P7L5	ldha	L-lactate dehydrogenase	Xenopus tropicalis	L-lactate dehydrogenase OS=Xenopus tropicalis OX=8364 GN=ldha PE=2 SV=1 - [Q6P7L5_XENTR]	7.23	3	1	2	3		3	infinity	332	36.5732	8.06006
Q6GN90	bola2.L	MGC82947 protein	Xenopus laevis	MGC82947 protein OS=Xenopus laevis OX=8355 GN=bola2.L PE=2 SV=1 - [Q6GN90_XENLA]	48.89	4	3	3	3		3	infinity	90	10.1622	5.74463
Q8AVQ2	uqcrfs1.S	Cytochrome b-c1 complex subunit Rieske, mitochondrial	Xenopus laevis	Cytochrome b-c1 complex subunit Rieske, mitochondrial OS=Xenopus laevis OX=8355 GN=uqcrfs1.S PE=2 SV=1 - [Q8AVQ2_XENLA]	10.07	3	2	2	3		3	infinity	268	28.6316	7.78174
A0A1L8H5M0	XB22164552.S	Cystatin domain-containing protein	Xenopus laevis	Cystatin domain-containing protein OS=Xenopus laevis OX=8355 GN=XB22164552.S PE=3 SV=1 - [A0A1L8H5M0_XENLA]	20	1	2	2	3		3	infinity	100	11.2296	5.03369
A0A1L8EQQ4	XELAEV_18047701mg	Nucleoside diphosphate kinase	Xenopus laevis	Nucleoside diphosphate kinase OS=Xenopus laevis OX=8355 GN=XELAEV_18047701mg PE=1 SV=1 - [A0A1L8EQQ4_XENLA]	22.22	6	3	3	3		3	infinity	180	19.8502	8.90967
A0A1L8EJX0	XELAEV_18003923mg	40S ribosomal protein S12 (Fragment)	Xenopus laevis	40S ribosomal protein S12 (Fragment) OS=Xenopus laevis OX=8355 GN=XELAEV_18003923mg PE=1 SV=1 - [A0A1L8EJX0_XENLA]	9.09	5	1	1	3		3	infinity	110	11.8892	6.7417
Q6NTU5	Uncharacterized protein OS=Xenopus laevis OX=8355	Uncharacterized protein	Xenopus laevis	Uncharacterized protein OS=Xenopus laevis OX=8355 PE=2 SV=1 - [Q6NTU5_XENLA]	3.7	1	1	1	2		2	infinity	243	26.9443	5.47803
A0A1L8HQD8	mapk1.S	Mitogen-activated protein kinase	Xenopus laevis	Mitogen-activated protein kinase OS=Xenopus laevis OX=8355 GN=mapk1.S PE=1 SV=1 - [A0A1L8HQD8_XENLA]	4.99	4	2	2	2		2	infinity	361	41.2301	6.75635
B0JZY7	rpl35	60S ribosomal protein L35	Xenopus tropicalis	60S ribosomal protein L35 OS=Xenopus tropicalis OX=8364 GN=rpl35 PE=2 SV=1 - [B0JZY7_XENTR]	8.13	7	1	1	2		2	infinity	123	14.3975	11.3853
Q32N33	chmp7.L	MGC68906 protein	Xenopus laevis	MGC68906 protein OS=Xenopus laevis OX=8355 GN=chmp7.L PE=2 SV=1 - [Q32N33_XENLA]	6.87	4	2	2	2		2	infinity	422	47.6895	5.2876
Q4QR44	rps15a.S	40S ribosomal protein S15a	Xenopus laevis	40S ribosomal protein S15a OS=Xenopus laevis OX=8355 GN=rps15a.S PE=1 SV=1 - [Q4QR44_XENLA]	13.08	3	2	2	2		2	infinity	130	14.846	10.0522
Q5XH78	pcbp2	Pcbp2 protein	Xenopus laevis	Pcbp2 protein OS=Xenopus laevis OX=8355 GN=pcbp2 PE=2 SV=1 - [Q5XH78_XENLA]	8.22	27	2	2	2		2	infinity	353	37.148	7.72314
Q6DE32	cltb.S	Clathrin light chain	Xenopus laevis	Clathrin light chain OS=Xenopus laevis OX=8355 GN=cltb.S PE=2 SV=1 - [Q6DE32_XENLA]	15.12	5	2	2	2		2	infinity	205	23.1881	4.43701
Q7ZTJ1	slc25a3.L	Phosphate carrier protein, mitochondrial	Xenopus laevis	Phosphate carrier protein, mitochondrial OS=Xenopus laevis OX=8355 GN=slc25a3.L PE=1 SV=1 - [Q7ZTJ1_XENLA]	3.9	6	1	1	2		2	infinity	359	39.8804	9.1001
Q6I803	s100a11.L	Calcium-binding protein p26olf	Xenopus laevis	Calcium-binding protein p26olf OS=Xenopus laevis OX=8355 GN=s100a11.L PE=1 SV=1 - [Q6I803_XENLA]	9.63	2	2	2	2		2	infinity	218	24.9278	6.11279
Q3B8K8	MGC82659	MGC82659 protein	Xenopus laevis	MGC82659 protein OS=Xenopus laevis OX=8355 GN=MGC82659 PE=1 SV=1 - [Q3B8K8_XENLA]	18.28	7	2	2	2		2	infinity	186	20.9474	6.39209
A0A1L8HTQ5	uchl1.L	Ubiquitin carboxyl-terminal hydrolase	Xenopus laevis	Ubiquitin carboxyl-terminal hydrolase OS=Xenopus laevis OX=8355 GN=uchl1.L PE=1 SV=1 - [A0A1L8HTQ5_XENLA]	8.73	7	1	2	2		2	infinity	252	27.9952	6.0874
A0A1L8H601	XELAEV_18014570mg	WD_REPEATS_REGION domain-containing protein	Xenopus laevis	WD_REPEATS_REGION domain-containing protein OS=Xenopus laevis OX=8355 GN=XELAEV_18014570mg PE=1 SV=1 - [A0A1L8H601_XENLA]	4.8	1	1	1	2		2	infinity	333	35.9998	5.33838
A0A1L8GQL8	XELAEV_18019773mg	Serine/threonine-protein phosphatase	Xenopus laevis	Serine/threonine-protein phosphatase OS=Xenopus laevis OX=8355 GN=XELAEV_18019773mg PE=3 SV=1 - [A0A1L8GQL8_XENLA]	11.56	5	2	2	2		2	infinity	225	26.3099	5.68115
B0JZW4	txndc12.L	Thioredoxin domain-containing protein 12	Xenopus laevis	Thioredoxin domain-containing protein 12 OS=Xenopus laevis OX=8355 GN=txndc12.L PE=1 SV=1 - [B0JZW4_XENLA]	8.33	7	1	1	2		2	infinity	168	18.6543	5.56689
A0A1L8GLH6	CIAPIN1	Anamorsin	Xenopus laevis	Anamorsin OS=Xenopus laevis OX=8355 GN=CIAPIN1 PE=1 SV=1 - [A0A1L8GLH6_XENLA]	9.65	1	2	2	2		2	infinity	311	33.0609	5.17334
A0A1L8GG39	npl.S	Uncharacterized protein	Xenopus laevis	Uncharacterized protein OS=Xenopus laevis OX=8355 GN=npl.S PE=1 SV=1 - [A0A1L8GG39_XENLA]	7.54	1	2	2	2		2	infinity	305	33.7421	6.91748
A0A1L8GCW7	fau.S	40S ribosomal protein S30	Xenopus laevis	40S ribosomal protein S30 OS=Xenopus laevis OX=8355 GN=fau.S PE=3 SV=1 - [A0A1L8GCW7_XENLA]	7.52	3	1	1	2		2	infinity	133	14.5288	10.1694
Q8UWG4	acp1.S	Low molecular weight cytosolic acid phosphatase	Xenopus laevis	Low molecular weight cytosolic acid phosphatase OS=Xenopus laevis OX=8355 GN=acp1.S PE=1 SV=1 - [Q8UWG4_XENLA]	11.95	3	2	2	2		2	infinity	159	17.9347	5.99854
A0A1L8G352	XELAEV_18029427mg	E3 ubiquitin-protein ligase E3D	Xenopus laevis	E3 ubiquitin-protein ligase E3D OS=Xenopus laevis OX=8355 GN=XELAEV_18029427mg PE=1 SV=1 - [A0A1L8G352_XENLA]	5.35	4	2	2	2		2	infinity	411	46.3402	6.81494
Q4FZM5	cyc1.S	MGC116545 protein	Xenopus laevis	MGC116545 protein OS=Xenopus laevis OX=8355 GN=cyc1.S PE=1 SV=1 - [Q4FZM5_XENLA]	7.77	2	1	1	2		2	infinity	309	34.0843	8.5874
A0A1L8FJ42	glrx3.L	Uncharacterized protein	Xenopus laevis	Uncharacterized protein OS=Xenopus laevis OX=8355 GN=glrx3.L PE=1 SV=1 - [A0A1L8FJ42_XENLA]	7.06	9	2	2	2		2	infinity	326	36.5856	5.47803
Q98UJ1	krt55.L	Adult keratin XAK-B	Xenopus laevis	Adult keratin XAK-B OS=Xenopus laevis OX=8355 GN=krt55.L PE=2 SV=1 - [Q98UJ1_XENLA]	3.42	1	1	1	2		2	infinity	497	53.7714	5.46533
A0A1L8ERT3	XELAEV_18043114mg	IF rod domain-containing protein	Xenopus laevis	IF rod domain-containing protein OS=Xenopus laevis OX=8355 GN=XELAEV_18043114mg PE=3 SV=1 - [A0A1L8ERT3_XENLA]	2.19	3	1	1	2		2	infinity	366	41.3273	4.99561
Q6PA56	LOC398959	T-complex protein 1 subunit delta (Fragment)	Xenopus laevis	T-complex protein 1 subunit delta (Fragment) OS=Xenopus laevis OX=8355 GN=LOC398959 PE=2 SV=1 - [Q6PA56_XENLA]	7.57	9	2	2	2		2	infinity	449	48.4609	5.84619
B2L4R8	Park7	Maillard deglycase (Fragment)	Xenopus borealis	Maillard deglycase (Fragment) OS=Xenopus borealis OX=8354 GN=Park7 PE=2 SV=1 - [B2L4R8_XENBO]	22.36	7	2	2	2		2	infinity	161	17.1111	7.21045
A0A6I8T246	pls3	Plastin 3	Xenopus tropicalis	Plastin 3 OS=Xenopus tropicalis OX=8364 GN=pls3 PE=4 SV=2 - [A0A6I8T246_XENTR]	4.42	6	2	2	2		2	infinity	611	68.8912	5.75732
F6R7N1	flna	Filamin A	Xenopus tropicalis	Filamin A OS=Xenopus tropicalis OX=8364 GN=flna PE=3 SV=4 - [F6R7N1_XENTR]	1.23	7	2	2	2		2	infinity	2517	267.522	5.85889
A0A6I8R6C1	cand1	Cullin-associated and neddylation-dissociated 1	Xenopus tropicalis	Cullin-associated and neddylation-dissociated 1 OS=Xenopus tropicalis OX=8364 GN=cand1 PE=3 SV=1 - [A0A6I8R6C1_XENTR]	2.21	7	2	2	2		2	infinity	1219	134.72	5.79541
A0A6I8RZF9	rps26	40S ribosomal protein S26	Xenopus tropicalis	40S ribosomal protein S26 OS=Xenopus tropicalis OX=8364 GN=rps26 PE=3 SV=1 - [A0A6I8RZF9_XENTR]	21.24	4	2	2	2		2	infinity	113	12.934	10.8579
A0A6I8SUK2	Ig-like domain-containing protein OS=Xenopus tropicalis OX=8364	Ig-like domain-containing protein	Xenopus tropicalis	Ig-like domain-containing protein OS=Xenopus tropicalis OX=8364 PE=4 SV=2 - [A0A6I8SUK2_XENTR]	7.83	3	1	1	2		2	infinity	115	12.387	4.71631
A2BDB5	LOC100037090	LOC100037090 protein (Fragment)	Xenopus laevis	LOC100037090 protein (Fragment) OS=Xenopus laevis OX=8355 GN=LOC100037090 PE=2 SV=1 - [A2BDB5_XENLA]	8.3	3	2	2	2		2	infinity	277	29.8781	6.66846
Q3B8B3	uchl1.S	Ubiquitin carboxyl-terminal hydrolase	Xenopus laevis	Ubiquitin carboxyl-terminal hydrolase OS=Xenopus laevis OX=8355 GN=uchl1.S PE=2 SV=1 - [Q3B8B3_XENLA]	9.87	8	1	2	2		2	infinity	223	24.8416	5.99854
Q6IRP7	atp5pd.L	ATP synthase subunit d, mitochondrial	Xenopus laevis	ATP synthase subunit d, mitochondrial OS=Xenopus laevis OX=8355 GN=atp5pd.L PE=1 SV=1 - [Q6IRP7_XENLA]	12.42	2	2	2	2		2	infinity	161	18.7106	7.48877
A0A1L8EUH3	jpt1.L	Uncharacterized protein	Xenopus laevis	Uncharacterized protein OS=Xenopus laevis OX=8355 GN=jpt1.L PE=3 SV=1 - [A0A1L8EUH3_XENLA]	15.28	1	1	1	2		2	infinity	144	14.7848	4.70361
Q5U555	ndufs3.L	Complex I-30kD	Xenopus laevis	Complex I-30kD OS=Xenopus laevis OX=8355 GN=ndufs3.L PE=2 SV=1 - [Q5U555_XENLA]	5.6	2	1	1	2		2	infinity	250	28.5676	6.15088
Q6IRP1	grx5-prov	Grx5-prov protein (Fragment)	Xenopus laevis	Grx5-prov protein (Fragment) OS=Xenopus laevis OX=8355 GN=grx5-prov PE=2 SV=1 - [Q6IRP1_XENLA]	8.67	5	2	2	2		2	infinity	150	16.6315	7.89893
F7B4W6	myl3	Myosin light chain 3	Xenopus tropicalis	Myosin light chain 3 OS=Xenopus tropicalis OX=8364 GN=myl3 PE=4 SV=3 - [F7B4W6_XENTR]	7.43	8	1	1	2		2	infinity	175	19.742	5.03369
F7BWX1	rpe	Ribulose-phosphate 3-epimerase	Xenopus tropicalis	Ribulose-phosphate 3-epimerase OS=Xenopus tropicalis OX=8364 GN=rpe PE=2 SV=3 - [F7BWX1_XENTR]	9.21	2	1	1	2		2	infinity	228	24.9692	5.80811
A0A1L8GDJ8	fen1.S	Flap endonuclease 1	Xenopus laevis	Flap endonuclease 1 OS=Xenopus laevis OX=8355 GN=fen1.S PE=1 SV=1 - [A0A1L8GDJ8_XENLA]	4.19	3	1	1	1		1	infinity	382	42.8382	7.92822
A0A1L8FDB9	selenbp1.L	Methanethiol oxidase	Xenopus laevis	Methanethiol oxidase OS=Xenopus laevis OX=8355 GN=selenbp1.L PE=3 SV=1 - [A0A1L8FDB9_XENLA]	2.33	1	1	1	1		1	infinity	472	52.5803	5.92236
A0A1L8ELM9	rps21.S	40S ribosomal protein S21	Xenopus laevis	40S ribosomal protein S21 OS=Xenopus laevis OX=8355 GN=rps21.S PE=1 SV=1 - [A0A1L8ELM9_XENLA]	12.05	3	1	1	1		1	infinity	83	9.2086	8.48486
A0A1L8GT74	pclaf.S	PCNA-associated factor	Xenopus laevis	PCNA-associated factor OS=Xenopus laevis OX=8355 GN=pclaf.S PE=4 SV=1 - [A0A1L8GT74_XENLA]	13.01	1	1	1	1		1	infinity	123	12.7641	8.6167
A0A1L8GFD4	wls.S	Uncharacterized protein	Xenopus laevis	Uncharacterized protein OS=Xenopus laevis OX=8355 GN=wls.S PE=1 SV=1 - [A0A1L8GFD4_XENLA]	2.03	2	1	1	1		1	infinity	541	61.8703	6.82959
A9ULY4	RNA helicase (Fragment) OS=Xenopus laevis OX=8355	RNA helicase (Fragment)	Xenopus laevis	RNA helicase (Fragment) OS=Xenopus laevis OX=8355 PE=2 SV=1 - [A9ULY4_XENLA]	1.96	11	1	1	1		1	infinity	460	51.5062	7.1958
A0AUU3	cox7a2.L	Cox7a2b protein	Xenopus laevis	Cox7a2b protein OS=Xenopus laevis OX=8355 GN=cox7a2.L PE=2 SV=1 - [A0AUU3_XENLA]	12.05	3	1	1	1		1	infinity	83	9.35213	10.228
Q05AV8	echs1.L	LOC733431 protein	Xenopus laevis	LOC733431 protein OS=Xenopus laevis OX=8355 GN=echs1.L PE=2 SV=1 - [Q05AV8_XENLA]	4	5	1	1	1		1	infinity	175	19.2481	8.85107
Q5I003	ndufs7.S	Complex I-20kD	Xenopus laevis	Complex I-20kD OS=Xenopus laevis OX=8355 GN=ndufs7.S PE=2 SV=1 - [Q5I003_XENLA]	5	7	1	1	1		1	infinity	180	20.4494	9.68604
Q5U511	vapb.S	LOC495400 protein	Xenopus laevis	LOC495400 protein OS=Xenopus laevis OX=8355 GN=vapb.S PE=2 SV=1 - [Q5U511_XENLA]	5.76	3	1	1	1		1	infinity	243	27.3341	7.32764
Q66J53	acadm.S	Medium-chain specific acyl-CoA dehydrogenase, mitochondrial	Xenopus laevis	Medium-chain specific acyl-CoA dehydrogenase, mitochondrial OS=Xenopus laevis OX=8355 GN=acadm.S PE=2 SV=1 - [Q66J53_XENLA]	1.9	4	1	1	1		1	infinity	422	46.1984	8.33838
Q6AZI4	LOC446231	LOC446231 protein (Fragment)	Xenopus laevis	LOC446231 protein (Fragment) OS=Xenopus laevis OX=8355 GN=LOC446231 PE=2 SV=1 - [Q6AZI4_XENLA]	5.88	5	1	1	1		1	infinity	153	17.7032	8.66064
Q6DDN9	cbs.S	Cystathionine beta-synthase	Xenopus laevis	Cystathionine beta-synthase OS=Xenopus laevis OX=8355 GN=cbs.S PE=2 SV=1 - [Q6DDN9_XENLA]	2.31	3	1	1	1		1	infinity	562	62.0459	6.66846
Q6DEB3	phb2.S	Prohibitin	Xenopus laevis	Prohibitin OS=Xenopus laevis OX=8355 GN=phb2.S PE=2 SV=1 - [Q6DEB3_XENLA]	3.99	1	1	1	1		1	infinity	301	33.3339	9.90576
Q6DCS3	bco2.L	Bcdo2-prov protein	Xenopus laevis	Bcdo2-prov protein OS=Xenopus laevis OX=8355 GN=bco2.L PE=2 SV=1 - [Q6DCS3_XENLA]	1.65	2	1	1	1		1	infinity	485	54.8293	6.7124
Q6DKB9	aco2.S	Aconitate hydratase, mitochondrial	Xenopus laevis	Aconitate hydratase, mitochondrial OS=Xenopus laevis OX=8355 GN=aco2.S PE=2 SV=1 - [Q6DKB9_XENLA]	3.84	1	1	1	1		1	infinity	782	85.2216	7.12256
Q6GNH9	prdx4.L	MGC82793 protein	Xenopus laevis	MGC82793 protein OS=Xenopus laevis OX=8355 GN=prdx4.L PE=2 SV=1 - [Q6GNH9_XENLA]	3	6	1	1	1		1	infinity	267	29.7922	6.72705
Q6INS0	gstt1.L	Glutathione transferase	Xenopus laevis	Glutathione transferase OS=Xenopus laevis OX=8355 GN=gstt1.L PE=2 SV=1 - [Q6INS0_XENLA]	3.72	1	1	1	1		1	infinity	242	27.6362	6.55127
Q6IRA2	XTm4	XTm4 protein	Xenopus laevis	XTm4 protein OS=Xenopus laevis OX=8355 GN=XTm4 PE=2 SV=1 - [Q6IRA2_XENLA]	4.61	37	1	1	1		1	infinity	152	17.5601	4.90674
Q7ZWW5	abcf2.L	Abcf2-prov protein	Xenopus laevis	Abcf2-prov protein OS=Xenopus laevis OX=8355 GN=abcf2.L PE=2 SV=1 - [Q7ZWW5_XENLA]	2.31	2	1	1	1		1	infinity	607	69.0693	7.07861
Q8AVS3	LOC398427	Annexin (Fragment)	Xenopus laevis	Annexin (Fragment) OS=Xenopus laevis OX=8355 GN=LOC398427 PE=2 SV=1 - [Q8AVS3_XENLA]	6.25	6	1	1	1		1	infinity	256	28.3586	6.39209
Q3B8H9	fech.L	Ferrochelatase	Xenopus laevis	Ferrochelatase OS=Xenopus laevis OX=8355 GN=fech.L PE=1 SV=1 - [Q3B8H9_XENLA]	3.83	2	1	1	1		1	infinity	418	46.8191	9.15869
A0A1L8I3S6	XELAEV_18008548mg	Transitional endoplasmic reticulum ATPase	Xenopus laevis	Transitional endoplasmic reticulum ATPase OS=Xenopus laevis OX=8355 GN=XELAEV_18008548mg PE=1 SV=1 - [A0A1L8I3S6_XENLA]	1.61	3	1	1	1		1	infinity	746	82.5771	5.21143
A0A1L8HWF1	XELAEV_18006153mg	Uncharacterized protein	Xenopus laevis	Uncharacterized protein OS=Xenopus laevis OX=8355 GN=XELAEV_18006153mg PE=3 SV=1 - [A0A1L8HWF1_XENLA]	7.69	6	1	1	1		1	infinity	117	13.2782	10.3159
A0A1L8HSZ6	XELAEV_18004968mg	Ig-like domain-containing protein	Xenopus laevis	Ig-like domain-containing protein OS=Xenopus laevis OX=8355 GN=XELAEV_18004968mg PE=4 SV=1 - [A0A1L8HSZ6_XENLA]	9.32	1	1	1	1		1	infinity	161	17.7016	8.17725
A0A1L8HRD1	XELAEV_18010883mg	Beta-hexosaminidase	Xenopus laevis	Beta-hexosaminidase OS=Xenopus laevis OX=8355 GN=XELAEV_18010883mg PE=3 SV=1 - [A0A1L8HRD1_XENLA]	3.09	4	1	1	1		1	infinity	517	58.7854	6.78564
A0A1L8HQ95	XELAEV_18010493mg	CN hydrolase domain-containing protein	Xenopus laevis	CN hydrolase domain-containing protein OS=Xenopus laevis OX=8355 GN=XELAEV_18010493mg PE=1 SV=1 - [A0A1L8HQ95_XENLA]	4.7	2	1	1	1		1	infinity	383	43.1363	6.53662
A0A1L8HP68	anxa1.2.S	Annexin	Xenopus laevis	Annexin OS=Xenopus laevis OX=8355 GN=anxa1.2.S PE=3 SV=1 - [A0A1L8HP68_XENLA]	4.73	2	1	1	1		1	infinity	338	37.6115	7.34229
A0A1L8HL04	XELAEV_18008998mg	UDP-glucose 6-dehydrogenase	Xenopus laevis	UDP-glucose 6-dehydrogenase OS=Xenopus laevis OX=8355 GN=XELAEV_18008998mg PE=3 SV=1 - [A0A1L8HL04_XENLA]	2.91	8	1	1	1		1	infinity	446	50.1257	7.15186
A0A1L8HFR9	ak2.L	Adenylate kinase 2, mitochondrial	Xenopus laevis	Adenylate kinase 2, mitochondrial OS=Xenopus laevis OX=8355 GN=ak2.L PE=3 SV=1 - [A0A1L8HFR9_XENLA]	5.11	3	1	1	1		1	infinity	235	25.9243	6.94678
A0A1L8HEC8	XELAEV_18012118mg	Uncharacterized protein	Xenopus laevis	Uncharacterized protein OS=Xenopus laevis OX=8355 GN=XELAEV_18012118mg PE=4 SV=1 - [A0A1L8HEC8_XENLA]	9.43	4	1	1	1		1	infinity	106	11.8098	9.27588
A0A1L8H8W5	XELAEV_18015541mg	Uncharacterized protein	Xenopus laevis	Uncharacterized protein OS=Xenopus laevis OX=8355 GN=XELAEV_18015541mg PE=4 SV=1 - [A0A1L8H8W5_XENLA]	21.33	1	1	1	1		1	infinity	75	8.51846	9.72998
A0A1L8H584	atp5pf.S	ATP synthase-coupling factor 6, mitochondrial	Xenopus laevis	ATP synthase-coupling factor 6, mitochondrial OS=Xenopus laevis OX=8355 GN=atp5pf.S PE=3 SV=1 - [A0A1L8H584_XENLA]	12.15	2	1	1	1		1	infinity	107	12.3724	9.20264
A0A1L8H048	pclaf.L	PCNA-associated factor	Xenopus laevis	PCNA-associated factor OS=Xenopus laevis OX=8355 GN=pclaf.L PE=1 SV=1 - [A0A1L8H048_XENLA]	12.5	1	1	1	1		1	infinity	128	13.2395	9.0415
A0A1L8GZH2	XELAEV_18017867mg	Uncharacterized protein	Xenopus laevis	Uncharacterized protein OS=Xenopus laevis OX=8355 GN=XELAEV_18017867mg PE=4 SV=1 - [A0A1L8GZH2_XENLA]	1.66	1	1	1	1		1	infinity	2044	229.562	6.66846
A0A1L8GS39	XELAEV_18020353mg	Annexin	Xenopus laevis	Annexin OS=Xenopus laevis OX=8355 GN=XELAEV_18020353mg PE=3 SV=1 - [A0A1L8GS39_XENLA]	5.3	2	1	1	1		1	infinity	321	35.9534	8.20654
A0A1L8GPS7	XELAEV_18023999mg	Dolichyl-diphosphooligosaccharide--protein glycosyltransferase subunit 1	Xenopus laevis	Dolichyl-diphosphooligosaccharide--protein glycosyltransferase subunit 1 OS=Xenopus laevis OX=8355 GN=XELAEV_18023999mg PE=1 SV=1 - [A0A1L8GPS7_XENLA]	1.68	5	1	1	1		1	infinity	595	67.1777	6.58057
A0A1L8GPL1	XELAEV_18023965mg	Imidazolonepropionate hydrolase	Xenopus laevis	Imidazolonepropionate hydrolase OS=Xenopus laevis OX=8355 GN=XELAEV_18023965mg PE=1 SV=1 - [A0A1L8GPL1_XENLA]	1.48	2	1	1	1		1	infinity	677	74.6852	6.60986
A0A1L8GMQ8	XELAEV_18023300mg	Holocytochrome c-type synthase	Xenopus laevis	Holocytochrome c-type synthase OS=Xenopus laevis OX=8355 GN=XELAEV_18023300mg PE=3 SV=1 - [A0A1L8GMQ8_XENLA]	5.32	2	1	1	1		1	infinity	301	34.1291	6.91748
A0A1L8GM46	XELAEV_18023070mg	TPR_REGION domain-containing protein	Xenopus laevis	TPR_REGION domain-containing protein OS=Xenopus laevis OX=8355 GN=XELAEV_18023070mg PE=1 SV=1 - [A0A1L8GM46_XENLA]	2.54	2	1	1	1		1	infinity	591	64.9851	4.55127
A0A1L8GLG8	XELAEV_18022830mg	Aspartate aminotransferase	Xenopus laevis	Aspartate aminotransferase OS=Xenopus laevis OX=8355 GN=XELAEV_18022830mg PE=1 SV=1 - [A0A1L8GLG8_XENLA]	1.87	2	1	1	1		1	infinity	427	47.5543	8.83643
A0A1L8GJR1	XELAEV_18022223mg	Ubiquitin thioesterase	Xenopus laevis	Ubiquitin thioesterase OS=Xenopus laevis OX=8355 GN=XELAEV_18022223mg PE=3 SV=1 - [A0A1L8GJR1_XENLA]	5.6	4	1	1	1		1	infinity	268	30.8073	5.21143
A0A1L8GB64	XELAEV_18027896mg	Coatomer subunit beta'	Xenopus laevis	Coatomer subunit beta' OS=Xenopus laevis OX=8355 GN=XELAEV_18027896mg PE=1 SV=1 - [A0A1L8GB64_XENLA]	2.02	1	1	1	1		1	infinity	891	99.992	5.13525
A0A1L8G931	XELAEV_18027219mg	PKS_ER domain-containing protein	Xenopus laevis	PKS_ER domain-containing protein OS=Xenopus laevis OX=8355 GN=XELAEV_18027219mg PE=1 SV=1 - [A0A1L8G931_XENLA]	2.24	2	1	1	1		1	infinity	401	43.8378	9.21729
A0A1L8G711	mrpl14.L	Uncharacterized protein	Xenopus laevis	Uncharacterized protein OS=Xenopus laevis OX=8355 GN=mrpl14.L PE=1 SV=1 - [A0A1L8G711_XENLA]	13.01	1	1	1	1		1	infinity	146	15.7185	10.2427
A0A1L8G5V2	XELAEV_18026130mg	Uncharacterized protein	Xenopus laevis	Uncharacterized protein OS=Xenopus laevis OX=8355 GN=XELAEV_18026130mg PE=4 SV=1 - [A0A1L8G5V2_XENLA]	4.42	1	1	1	1		1	infinity	249	28.2653	9.87646
A0A1L8G599	mtmr9.S	Myotubularin phosphatase domain-containing protein	Xenopus laevis	Myotubularin phosphatase domain-containing protein OS=Xenopus laevis OX=8355 GN=mtmr9.S PE=3 SV=1 - [A0A1L8G599_XENLA]	4.01	1	1	1	1		1	infinity	549	63.237	6.44287
A0A1L8G4S4	XELAEV_18029906mg	WD_REPEATS_REGION domain-containing protein	Xenopus laevis	WD_REPEATS_REGION domain-containing protein OS=Xenopus laevis OX=8355 GN=XELAEV_18029906mg PE=3 SV=1 - [A0A1L8G4S4_XENLA]	1.93	3	1	1	1		1	infinity	622	69.834	6.55127
A0A1L8FQC7	iba57.S	Uncharacterized protein	Xenopus laevis	Uncharacterized protein OS=Xenopus laevis OX=8355 GN=iba57.S PE=1 SV=1 - [A0A1L8FQC7_XENLA]	3.13	1	1	1	1		1	infinity	319	35.0273	8.23584
A0A1L8FLJ6	XELAEV_18035433mg	ATP synthase subunit	Xenopus laevis	ATP synthase subunit OS=Xenopus laevis OX=8355 GN=XELAEV_18035433mg PE=3 SV=1 - [A0A1L8FLJ6_XENLA]	12.15	2	1	1	1		1	infinity	107	11.6913	9.92041
A0A1L8FEV4	XELAEV_18037032mg	Uncharacterized protein	Xenopus laevis	Uncharacterized protein OS=Xenopus laevis OX=8355 GN=XELAEV_18037032mg PE=4 SV=1 - [A0A1L8FEV4_XENLA]	2.02	1	1	1	1		1	infinity	495	57.6252	6.49365
A0A1L8FDW8	XELAEV_18036685mg	Uncharacterized protein	Xenopus laevis	Uncharacterized protein OS=Xenopus laevis OX=8355 GN=XELAEV_18036685mg PE=3 SV=1 - [A0A1L8FDW8_XENLA]	1.39	8	1	1	1		1	infinity	1364	152.545	6.63916
A0A1L8FA11	XELAEV_18039722mg	Creatine kinase	Xenopus laevis	Creatine kinase OS=Xenopus laevis OX=8355 GN=XELAEV_18039722mg PE=1 SV=1 - [A0A1L8FA11_XENLA]	3.19	3	1	1	1		1	infinity	282	31.7626	6.04932
A0A1L8EVI2	XELAEV_18044446mg	Uncharacterized protein	Xenopus laevis	Uncharacterized protein OS=Xenopus laevis OX=8355 GN=XELAEV_18044446mg PE=4 SV=1 - [A0A1L8EVI2_XENLA]	4.11	5	1	1	1		1	infinity	341	39.1457	6.23975
A0A1L8EPX4	idh1.S	Isocitrate dehydrogenase [NADP]	Xenopus laevis	Isocitrate dehydrogenase [NADP] OS=Xenopus laevis OX=8355 GN=idh1.S PE=3 SV=1 - [A0A1L8EPX4_XENLA]	3.13	3	1	1	1		1	infinity	415	46.8784	6.12549
A0A1L8EPM7	XELAEV_18047295mg	5-aminoimidazole-4-carboxamide ribonucleotide formyltransferase	Xenopus laevis	5-aminoimidazole-4-carboxamide ribonucleotide formyltransferase OS=Xenopus laevis OX=8355 GN=XELAEV_18047295mg PE=1 SV=1 - [A0A1L8EPM7_XENLA]	1.5	3	1	1	1		1	infinity	532	57.9958	7.26904
A0JPG5	LOC100036792	MICOS complex subunit MIC60 (Fragment)	Xenopus laevis	MICOS complex subunit MIC60 (Fragment) OS=Xenopus laevis OX=8355 GN=LOC100036792 PE=2 SV=1 - [A0JPG5_XENLA]	2.02	3	1	1	1		1	infinity	495	54.5275	6.32861
A5PKP3	gart.L	Glycinamide ribonucleotide synthetase	Xenopus laevis	Glycinamide ribonucleotide synthetase OS=Xenopus laevis OX=8355 GN=gart.L PE=2 SV=1 - [A5PKP3_XENLA]	2.95	2	1	1	1		1	infinity	440	46.2409	5.92236
Q4FZQ3	rpl34	60S ribosomal protein L34	Xenopus laevis	60S ribosomal protein L34 OS=Xenopus laevis OX=8355 GN=rpl34 PE=2 SV=1 - [Q4FZQ3_XENLA]	7.69	3	1	1	1		1	infinity	117	13.2535	11.4731
Q6GR67	LOC397932	LOC397932 protein	Xenopus laevis	LOC397932 protein OS=Xenopus laevis OX=8355 GN=LOC397932 PE=2 SV=1 - [Q6GR67_XENLA]	7.05	8	1	1	1		1	infinity	156	18.2301	5.12256
P70071	nme2.L	Nucleoside diphosphate kinase	Xenopus laevis	Nucleoside diphosphate kinase OS=Xenopus laevis OX=8355 GN=nme2.L PE=2 SV=1 - [P70071_XENLA]	11.04	3	1	1	1		1	infinity	154	17.4599	6.56592
B9VQ38	Telophase disc 60 kDa protein (Fragment) OS=Xenopus laevis OX=8355	Telophase disc 60 kDa protein (Fragment)	Xenopus laevis	Telophase disc 60 kDa protein (Fragment) OS=Xenopus laevis OX=8355 PE=2 SV=1 - [B9VQ38_XENLA]	2.82	4	1	1	1		1	infinity	497	53.4799	8.79248
A0A1B8XTE4	XENTR_v90028707mg	IGv domain-containing protein	Xenopus tropicalis	IGv domain-containing protein OS=Xenopus tropicalis OX=8364 GN=XENTR_v90028707mg PE=4 SV=1 - [A0A1B8XTE4_XENTR]	9.47	10	1	1	1		1	infinity	95	10.6834	9.51025
Q28J74	atp5po	ATP synthase subunit O, mitochondrial	Xenopus tropicalis	ATP synthase subunit O, mitochondrial OS=Xenopus tropicalis OX=8364 GN=atp5po PE=2 SV=1 - [Q28J74_XENTR]	6.64	3	1	1	1		1	infinity	211	22.7955	9.81787
Q6DIG6	ppp2r1b	Platelet-derived growth factor beta polypeptide (Simian sarcoma viral (V-sis) oncogene homolog)	Xenopus tropicalis	Platelet-derived growth factor beta polypeptide (Simian sarcoma viral (V-sis) oncogene homolog) OS=Xenopus tropicalis OX=8364 GN=ppp2r1b PE=2 SV=1 - [Q6DIG6_XENTR]	1.7	6	1	1	1		1	infinity	589	65.3881	5.04639
A0A6I8SAZ1	carm1	Coactivator-associated arginine methyltransferase 1	Xenopus tropicalis	Coactivator-associated arginine methyltransferase 1 OS=Xenopus tropicalis OX=8364 GN=carm1 PE=4 SV=2 - [A0A6I8SAZ1_XENTR]	2.27	5	1	1	1		1	infinity	572	62.5117	6.48096
A0A7D9NJR0	tuba1c	Peptidylprolyl isomerase domain and WD repeat-containing 1	Xenopus tropicalis	Peptidylprolyl isomerase domain and WD repeat-containing 1 OS=Xenopus tropicalis OX=8364 GN=tuba1c PE=4 SV=2 - [A0A7D9NJR0_XENTR]	2.61	3	1	1	1		1	infinity	612	69.3409	8.54346
A0A6I8SDW2	jup	Junction plakoglobin	Xenopus tropicalis	Junction plakoglobin OS=Xenopus tropicalis OX=8364 GN=jup PE=3 SV=2 - [A0A6I8SDW2_XENTR]	1.05	6	1	1	1		1	infinity	669	73.7838	6.41748
A0A6I8S1W2	pdha1	Pyruvate dehydrogenase E1 component subunit alpha	Xenopus tropicalis	Pyruvate dehydrogenase E1 component subunit alpha OS=Xenopus tropicalis OX=8364 GN=pdha1 PE=4 SV=2 - [A0A6I8S1W2_XENTR]	2.23	11	1	1	1		1	infinity	358	40.0067	6.60986
F6V5P5	ndufa13	Annexin	Xenopus tropicalis	Annexin OS=Xenopus tropicalis OX=8364 GN=ndufa13 PE=3 SV=4 - [F6V5P5_XENTR]	7.09	6	1	1	1		1	infinity	141	16.4897	9.72998
A0A6I8SC88	ube2n	Ubiquitin-conjugating enzyme E2 N	Xenopus tropicalis	Ubiquitin-conjugating enzyme E2 N OS=Xenopus tropicalis OX=8364 GN=ube2n PE=4 SV=1 - [A0A6I8SC88_XENTR]	7.38	7	1	1	1		1	infinity	149	16.9218	5.5542
A9JSN0	LOC100127764	Complex I-13kD-A (Fragment)	Xenopus tropicalis	Complex I-13kD-A (Fragment) OS=Xenopus tropicalis OX=8364 GN=LOC100127764 PE=2 SV=1 - [A9JSN0_XENTR]	12.5	4	1	1	1		1	infinity	120	13.4887	8.93896
A0A6I8RV71	ndufs8	Complex I-23kD	Xenopus tropicalis	Complex I-23kD OS=Xenopus tropicalis OX=8364 GN=ndufs8 PE=3 SV=1 - [A0A6I8RV71_XENTR]	3.61	6	1	1	1		1	infinity	194	22.284	5.65576
A0A6I8QBE0	hsd17b4	Hydroxysteroid (17-beta) dehydrogenase 4	Xenopus tropicalis	Hydroxysteroid (17-beta) dehydrogenase 4 OS=Xenopus tropicalis OX=8364 GN=hsd17b4 PE=4 SV=2 - [A0A6I8QBE0_XENTR]	1.85	5	1	1	1		1	infinity	704	76.6182	7.26904
A0A6I8RWV6	ndufv1	NADH dehydrogenase [ubiquinone] flavoprotein 1, mitochondrial	Xenopus tropicalis	NADH dehydrogenase [ubiquinone] flavoprotein 1, mitochondrial OS=Xenopus tropicalis OX=8364 GN=ndufv1 PE=3 SV=2 - [A0A6I8RWV6_XENTR]	3.41	7	1	1	1		1	infinity	440	47.9675	8.76318
F7BQF6	aldh7a1	Aldehyde dehydrogenase (NAD(+))	Xenopus tropicalis	Aldehyde dehydrogenase (NAD(+)) OS=Xenopus tropicalis OX=8364 GN=aldh7a1 PE=3 SV=4 - [F7BQF6_XENTR]	2.24	7	1	1	1		1	infinity	490	52.9482	6.02393
A0A6I8RBX3	fam120c	Family with sequence similarity 120C	Xenopus tropicalis	Family with sequence similarity 120C OS=Xenopus tropicalis OX=8364 GN=fam120c PE=3 SV=1 - [A0A6I8RBX3_XENTR]	0.77	1	1	1	1		1	infinity	1040	114.493	8.54346
A0A6I8SYN3	ndufa9	NADH:ubiquinone oxidoreductase subunit A9	Xenopus tropicalis	NADH:ubiquinone oxidoreductase subunit A9 OS=Xenopus tropicalis OX=8364 GN=ndufa9 PE=4 SV=2 - [A0A6I8SYN3_XENTR]	3.77	4	1	1	1		1	infinity	371	42.4582	9.29053
A0A1B8XYE1	XENTR_v90029423mg	Uncharacterized protein	Xenopus tropicalis	Uncharacterized protein OS=Xenopus tropicalis OX=8364 GN=XENTR_v90029423mg PE=4 SV=1 - [A0A1B8XYE1_XENTR]	0.33	2	1	1	1		1	infinity	5725	644.466	5.93506
A0A1B8XVR4	XENTR_v900259333mg	Uncharacterized protein (Fragment)	Xenopus tropicalis	Uncharacterized protein (Fragment) OS=Xenopus tropicalis OX=8364 GN=XENTR_v900259333mg PE=3 SV=1 - [A0A1B8XVR4_XENTR]	4.09	6	1	1	1		1	infinity	318	34.9686	7.98682
A0A6I8RB27	cndp2	CNDP dipeptidase 2 (metallopeptidase M20 family)	Xenopus tropicalis	CNDP dipeptidase 2 (metallopeptidase M20 family) OS=Xenopus tropicalis OX=8364 GN=cndp2 PE=3 SV=1 - [A0A6I8RB27_XENTR]	3.22	6	1	1	1		1	infinity	466	51.5652	5.50342
A0A6I8R3Z4	c3	Complement C3	Xenopus tropicalis	Complement C3 OS=Xenopus tropicalis OX=8364 GN=c3 PE=4 SV=2 - [A0A6I8R3Z4_XENTR]	0.78	14	1	1	1		1	infinity	1538	172.111	7.38623
A0A6I8SHZ8	dlgap3	Discs, large homolog-associated protein 3	Xenopus tropicalis	Discs, large homolog-associated protein 3 OS=Xenopus tropicalis OX=8364 GN=dlgap3 PE=3 SV=2 - [A0A6I8SHZ8_XENTR]	2.44	3	1	1	1		1	infinity	901	100.027	8.44092
A0A6I8S2P1	p4hb	Protein disulfide-isomerase	Xenopus tropicalis	Protein disulfide-isomerase OS=Xenopus tropicalis OX=8364 GN=p4hb PE=3 SV=1 - [A0A6I8S2P1_XENTR]	2.13	7	1	1	1		1	infinity	469	52.16	4.81787
F6UFL5	dnajc25	DnaJ homolog subfamily C member 25	Xenopus tropicalis	DnaJ homolog subfamily C member 25 OS=Xenopus tropicalis OX=8364 GN=dnajc25 PE=3 SV=2 - [F6UFL5_XENTR]	3.75	5	1	1	1		1	infinity	267	29.5654	9.75928
A0A803KCU2	Uncharacterized protein OS=Xenopus tropicalis OX=8364	Uncharacterized protein	Xenopus tropicalis	Uncharacterized protein OS=Xenopus tropicalis OX=8364 PE=4 SV=1 - [A0A803KCU2_XENTR]	1.82	7	1	1	1		1	infinity	713	80.2081	7.00537
A0A803JJW9	paics.1	Phosphoribosylaminoimidazole carboxylase; phosphoribosylaminoimidazolesuccinocarboxamide synthase	Xenopus tropicalis	Phosphoribosylaminoimidazole carboxylase; phosphoribosylaminoimidazolesuccinocarboxamide synthase OS=Xenopus tropicalis OX=8364 GN=paics.1 PE=4 SV=1 - [A0A803JJW9_XENTR]	3.65	11	1	1	1		1	infinity	384	42.8486	6.84424
Q5M8W7	LOC496671	2-iminobutanoate/2-iminopropanoate deaminase (Fragment)	Xenopus tropicalis	2-iminobutanoate/2-iminopropanoate deaminase (Fragment) OS=Xenopus tropicalis OX=8364 GN=LOC496671 PE=2 SV=1 - [Q5M8W7_XENTR]	7.3	4	1	1	1		1	infinity	137	14.4255	7.94287
A0A6I8Q1W0	gmps	Glutamine amidotransferase	Xenopus tropicalis	Glutamine amidotransferase OS=Xenopus tropicalis OX=8364 GN=gmps PE=4 SV=1 - [A0A6I8Q1W0_XENTR]	1.6	6	1	1	1		1	infinity	687	76.0364	6.93213
A0A1B8XWK0	XENTR_v90030749mg	CAD protein	Xenopus tropicalis	CAD protein OS=Xenopus tropicalis OX=8364 GN=XENTR_v90030749mg PE=3 SV=1 - [A0A1B8XWK0_XENTR]	1.32	8	1	1	1		1	infinity	1964	217.225	6.50732
A0A6I8QBI6	siae	Sialic acid acetylesterase	Xenopus tropicalis	Sialic acid acetylesterase OS=Xenopus tropicalis OX=8364 GN=siae PE=4 SV=2 - [A0A6I8QBI6_XENTR]	2.3	5	1	1	1		1	infinity	478	54.1225	5.70654
A0A803KKY1	rps10	Ribosomal protein S10	Xenopus tropicalis	Ribosomal protein S10 OS=Xenopus tropicalis OX=8364 GN=rps10 PE=2 SV=1 - [A0A803KKY1_XENTR]	9.09	7	1	1	1		1	infinity	165	18.8709	10.1108
A0A6I8REN9	ndufa5	Complex I subunit B13	Xenopus tropicalis	Complex I subunit B13 OS=Xenopus tropicalis OX=8364 GN=ndufa5 PE=3 SV=1 - [A0A6I8REN9_XENTR]	13.64	4	1	1	1		1	infinity	110	12.7847	5.93506
A0A803JP98	psmd4	Proteasome 26S subunit, non-ATPase 4	Xenopus tropicalis	Proteasome 26S subunit, non-ATPase 4 OS=Xenopus tropicalis OX=8364 GN=psmd4 PE=4 SV=1 - [A0A803JP98_XENTR]	3.22	8	1	1	1		1	infinity	373	40.3581	4.79248
A0A6I8QGU4	actn3	Actinin alpha 3 (gene/pseudogene)	Xenopus tropicalis	Actinin alpha 3 (gene/pseudogene) OS=Xenopus tropicalis OX=8364 GN=actn3 PE=3 SV=2 - [A0A6I8QGU4_XENTR]	1.41	10	1	1	1		1	infinity	851	98.3577	5.50342
F6PIZ4	rbbp8nl	RBBP8 N-terminal-like	Xenopus tropicalis	RBBP8 N-terminal-like OS=Xenopus tropicalis OX=8364 GN=rbbp8nl PE=2 SV=2 - [F6PIZ4_XENTR]	2.49	1	1	1	1		1	infinity	643	73.0175	6.94678
Q6DK80	krt70	Keratin	Xenopus tropicalis	Keratin OS=Xenopus tropicalis OX=8364 GN=krt70 PE=2 SV=1 - [Q6DK80_XENTR]	2.14	1	1	1	1		1	infinity	421	46.9402	5.19873
A0A6I8SJM6	cse1l	Chromosome segregation 1-like protein	Xenopus tropicalis	Chromosome segregation 1-like protein OS=Xenopus tropicalis OX=8364 GN=cse1l PE=3 SV=2 - [A0A6I8SJM6_XENTR]	1.42	5	1	1	1		1	infinity	915	103.351	5.80811
Q505I1	fgb	Fibrinogen beta chain (Fragment)	Xenopus tropicalis	Fibrinogen beta chain (Fragment) OS=Xenopus tropicalis OX=8364 GN=fgb PE=2 SV=1 - [Q505I1_XENTR]	1.85	3	1	1	1		1	infinity	486	54.5702	6.29053
A0A803JAN8	alb	Albumin	Xenopus tropicalis	Albumin OS=Xenopus tropicalis OX=8364 GN=alb PE=4 SV=1 - [A0A803JAN8_XENTR]	1.71	3	1	1	1		1	infinity	586	67.5276	5.99854
B0BM08	MGC76324	MGC76324 protein (Fragment)	Xenopus tropicalis	MGC76324 protein (Fragment) OS=Xenopus tropicalis OX=8364 GN=MGC76324 PE=2 SV=1 - [B0BM08_XENTR]	8.97	14	1	1	1		1	infinity	145	16.1869	4.61475
Q6PG55	atp5pf.L	ATP synthase-coupling factor 6, mitochondrial	Xenopus laevis	ATP synthase-coupling factor 6, mitochondrial OS=Xenopus laevis OX=8355 GN=atp5pf.L PE=1 SV=1 - [Q6PG55_XENLA]	12.15	1	1	1	1		1	infinity	107	12.3515	9.40771
A0A1L8H4E9	XELAEV_18019576mg	Uncharacterized protein	Xenopus laevis	Uncharacterized protein OS=Xenopus laevis OX=8355 GN=XELAEV_18019576mg PE=4 SV=1 - [A0A1L8H4E9_XENLA]	4.42	6	1	1	1		1	infinity	226	25.7108	7.82568
A0A1L8GWZ4	ndufa2.L	NADH dehydrogenase [ubiquinone] 1 alpha subcomplex subunit 2	Xenopus laevis	NADH dehydrogenase [ubiquinone] 1 alpha subcomplex subunit 2 OS=Xenopus laevis OX=8355 GN=ndufa2.L PE=3 SV=1 - [A0A1L8GWZ4_XENLA]	16	4	1	1	1		1	infinity	100	11.258	9.71533
A0A1L8FSQ0	ndufv2.S	NADH dehydrogenase [ubiquinone] flavoprotein 2, mitochondrial	Xenopus laevis	NADH dehydrogenase [ubiquinone] flavoprotein 2, mitochondrial OS=Xenopus laevis OX=8355 GN=ndufv2.S PE=3 SV=1 - [A0A1L8FSQ0_XENLA]	6.1	2	1	1	1		1	infinity	213	23.6117	5.57959
A0A1L8FEI7	atp5mk.S	Uncharacterized protein	Xenopus laevis	Uncharacterized protein OS=Xenopus laevis OX=8355 GN=atp5mk.S PE=4 SV=1 - [A0A1L8FEI7_XENLA]	16.95	2	1	1	1		1	infinity	59	6.56745	9.90576
Q6GPL6	gca.L	MGC83560 protein	Xenopus laevis	MGC83560 protein OS=Xenopus laevis OX=8355 GN=gca.L PE=1 SV=1 - [Q6GPL6_XENLA]	7.73	1	1	1	1		1	infinity	207	23.6141	5.59229
Q66KW6	cpo.1.L	MGC85368 protein	Xenopus laevis	MGC85368 protein OS=Xenopus laevis OX=8355 GN=cpo.1.L PE=2 SV=1 - [Q66KW6_XENLA]	3.93	2	1	1	1		1	infinity	356	40.9422	6.39209
Q91567	G56	G56 protein (Fragment)	Xenopus laevis	G56 protein (Fragment) OS=Xenopus laevis OX=8355 GN=G56 PE=2 SV=1 - [Q91567_XENLA]	21.57	10	1	1	1		1	infinity	51	5.57397	8.57275
Q9ZZM1	Cytochrome c oxidase subunit 2 (Fragment) OS=Xenopus laevis OX=8355	Cytochrome c oxidase subunit 2 (Fragment)	Xenopus laevis	Cytochrome c oxidase subunit 2 (Fragment) OS=Xenopus laevis OX=8355 PE=2 SV=1 - [Q9ZZM1_XENLA]	9.22	22	1	1	1		1	infinity	217	24.6673	4.729
Q28IQ2	ret	Sorcin	Xenopus tropicalis	Sorcin OS=Xenopus tropicalis OX=8364 GN=ret PE=2 SV=1 - [Q28IQ2_XENTR]	5.64	4	1	1	1		1	infinity	195	21.6032	5.89697
Q6P7Z2	elob	Elongin B	Xenopus tropicalis	Elongin B OS=Xenopus tropicalis OX=8364 GN=elob PE=2 SV=1 - [Q6P7Z2_XENTR]	5.88	5	1	1	1		1	infinity	119	13.2466	5.12256
A0A6I8SNK4	tyms	Thymidylate synthase	Xenopus tropicalis	Thymidylate synthase OS=Xenopus tropicalis OX=8364 GN=tyms PE=4 SV=2 - [A0A6I8SNK4_XENTR]	4.96	4	1	1	1		1	infinity	282	32.4082	7.6499
A0A1B8XU39	XENTR_v900276441mg	ZnF_CDGSH domain-containing protein (Fragment)	Xenopus tropicalis	ZnF_CDGSH domain-containing protein (Fragment) OS=Xenopus tropicalis OX=8364 GN=XENTR_v900276441mg PE=4 SV=1 - [A0A1B8XU39_XENTR]	13.4	4	1	1	1		1	infinity	97	10.8173	8.1626
A0A803K5T0	spr	Sepiapterin reductase	Xenopus tropicalis	Sepiapterin reductase OS=Xenopus tropicalis OX=8364 GN=spr PE=4 SV=1 - [A0A803K5T0_XENTR]	4.2	2	1	1	1		1	infinity	262	28.5028	7.81104
F7BIN3	ergic1	Endoplasmic reticulum-golgi intermediate compartment 1	Xenopus tropicalis	Endoplasmic reticulum-golgi intermediate compartment 1 OS=Xenopus tropicalis OX=8364 GN=ergic1 PE=3 SV=4 - [F7BIN3_XENTR]	3.69	6	1	1	1		1	infinity	271	30.5733	6.44287
A0A803KH87	ssr1	Signal sequence receptor, alpha (translocon-associated protein alpha)	Xenopus tropicalis	Signal sequence receptor, alpha (translocon-associated protein alpha) OS=Xenopus tropicalis OX=8364 GN=ssr1 PE=4 SV=1 - [A0A803KH87_XENTR]	2.89	7	1	1	1		1	infinity	277	30.9633	4.42432
A0A1L8HBN8	XELAEV_18016554mg	Uncharacterized protein	Xenopus laevis	Uncharacterized protein OS=Xenopus laevis OX=8355 GN=XELAEV_18016554mg PE=1 SV=1 - [A0A1L8HBN8_XENLA]	42.54	17	4	19	62	6	56	9.33333	670	75.8792	6.06201
G3GBS3	PRDX2	Peroxiredoxin 2	Xenopus laevis	Peroxiredoxin 2 OS=Xenopus laevis OX=8355 GN=PRDX2 PE=1 SV=1 - [G3GBS3_XENLA]	38.61	5	7	8	20	2	18	9	202	22.4126	7.00537
A0A6I8RW99	tpi1	Triosephosphate isomerase	Xenopus tropicalis	Triosephosphate isomerase OS=Xenopus tropicalis OX=8364 GN=tpi1 PE=3 SV=1 - [A0A6I8RW99_XENTR]	21.29	2	1	4	10	1	9	9	249	26.7738	6.90283
A0A1L8ET92	XELAEV_18043640mg	Peptidylprolyl isomerase	Xenopus laevis	Peptidylprolyl isomerase OS=Xenopus laevis OX=8355 GN=XELAEV_18043640mg PE=4 SV=1 - [A0A1L8ET92_XENLA]	28.83	5	4	4	9	1	8	8	111	12.2162	8.68994
Q7ZWY6	rpl9.L	60S ribosomal protein L9	Xenopus laevis	60S ribosomal protein L9 OS=Xenopus laevis OX=8355 GN=rpl9.L PE=2 SV=1 - [Q7ZWY6_XENLA]	41.15	5	1	5	14	2	12	6	192	21.8848	10.0376
A4FVF5	XB5843130.S	60S acidic ribosomal protein P2	Xenopus laevis	60S acidic ribosomal protein P2 OS=Xenopus laevis OX=8355 GN=XB5843130.S PE=2 SV=1 - [A4FVF5_XENLA]	53.15	5	2	4	7	1	6	6	111	11.1766	4.61475
A0A1L8FRG2	rpl15.S	Ribosomal protein L15	Xenopus laevis	Ribosomal protein L15 OS=Xenopus laevis OX=8355 GN=rpl15.S PE=1 SV=1 - [A0A1L8FRG2_XENLA]	20.59	4	4	4	7	1	6	6	204	24.045	11.4585
Q5XGT4	krt61L	LOC495267 protein	Xenopus laevis	LOC495267 protein OS=Xenopus laevis OX=8355 GN=krt61L PE=2 SV=1 - [Q5XGT4_XENLA]	7.46	2	1	6	19	3	16	5.33333	590	63.1243	8.11865
A0A1L8FYX8	XELAEV_18031993mg	UBC core domain-containing protein	Xenopus laevis	UBC core domain-containing protein OS=Xenopus laevis OX=8355 GN=XELAEV_18031993mg PE=1 SV=1 - [A0A1L8FYX8_XENLA]	21.17	19	3	3	6	1	5	5	137	15.7319	7.18115
A0A090B2N7	mcm3.L	DNA helicase	Xenopus laevis	DNA helicase OS=Xenopus laevis OX=8355 GN=mcm3.L PE=1 SV=1 - [A0A090B2N7_XENLA]	5.33	12	4	4	5	1	4	4	807	90.349	6.78564
Q6IND2	prdx1.L	MGC83501 protein	Xenopus laevis	MGC83501 protein OS=Xenopus laevis OX=8355 GN=prdx1.L PE=1 SV=1 - [Q6IND2_XENLA]	37.19	3	1	5	14	3	11	3.66667	199	22.2853	6.771
A0A803KIZ1	serpinb6	Serpin family B member 6	Xenopus tropicalis	Serpin family B member 6 OS=Xenopus tropicalis OX=8364 GN=serpinb6 PE=4 SV=1 - [A0A803KIZ1_XENTR]	17.94	5	1	4	16	4	12	3	379	42.6585	5.74463
A0A1L8HIK3	XELAEV_18013612mg	IF rod domain-containing protein	Xenopus laevis	IF rod domain-containing protein OS=Xenopus laevis OX=8355 GN=XELAEV_18013612mg PE=3 SV=1 - [A0A1L8HIK3_XENLA]	6.76	23	1	4	8	2	6	3	503	53.6883	8.47021
A0A1L8EUL7	avd.2.L	Uncharacterized protein	Xenopus laevis	Uncharacterized protein OS=Xenopus laevis OX=8355 GN=avd.2.L PE=3 SV=1 - [A0A1L8EUL7_XENLA]	33.12	1	4	4	8	2	6	3	154	16.7384	7.34229
Q3KPK1	tbcb.S	MGC132396 protein	Xenopus laevis	MGC132396 protein OS=Xenopus laevis OX=8355 GN=tbcb.S PE=1 SV=1 - [Q3KPK1_XENLA]	9.35	4	2	2	4	1	3	3	246	27.5045	5.08447
Q5U4I5	dnpep.S	Aspartyl aminopeptidase	Xenopus laevis	Aspartyl aminopeptidase OS=Xenopus laevis OX=8355 GN=dnpep.S PE=1 SV=1 - [Q5U4I5_XENLA]	5.64	5	2	2	4	1	3	3	479	52.8177	6.7124
Q7SZB6	LOC398653	60S acidic ribosomal protein P2 (Fragment)	Xenopus laevis	60S acidic ribosomal protein P2 (Fragment) OS=Xenopus laevis OX=8355 GN=LOC398653 PE=2 SV=1 - [Q7SZB6_XENLA]	32.29	7	1	3	4	1	3	3	96	9.61632	9.80322
A1L3K2	LOC100037030	Pyruvate kinase	Xenopus laevis	Pyruvate kinase OS=Xenopus laevis OX=8355 GN=LOC100037030 PE=2 SV=1 - [A1L3K2_XENLA]	17.89	7	2	6	7	2	5	2.5	531	57.808	7.47412
A2BDA9	LOC100037087	LOC100037087 protein	Xenopus laevis	LOC100037087 protein OS=Xenopus laevis OX=8355 GN=LOC100037087 PE=2 SV=1 - [A2BDA9_XENLA]	6.73	1	1	6	37	12	25	2.08333	490	54.5315	5.8208
A0A1L8GQZ4	XELAEV_18019975mg	HMA domain-containing protein	Xenopus laevis	HMA domain-containing protein OS=Xenopus laevis OX=8355 GN=XELAEV_18019975mg PE=4 SV=1 - [A0A1L8GQZ4_XENLA]	8.9	1	1	1	3	1	2	2	146	15.8772	7.02002
Q7SZ19	LOC398472	Annexin (Fragment)	Xenopus laevis	Annexin (Fragment) OS=Xenopus laevis OX=8355 GN=LOC398472 PE=2 SV=1 - [Q7SZ19_XENLA]	7.23	7	2	2	3	1	2	2	318	35.5682	5.21143
Q6AZI9	prps1.L	Ribose-phosphate diphosphokinase	Xenopus laevis	Ribose-phosphate diphosphokinase OS=Xenopus laevis OX=8355 GN=prps1.L PE=1 SV=1 - [Q6AZI9_XENLA]	9.43	6	2	2	2	1	1	1	318	34.807	6.96143
A0A1L8GWU8	XELAEV_18016934mg	75 kDa glucose-regulated protein	Xenopus laevis	75 kDa glucose-regulated protein OS=Xenopus laevis OX=8355 GN=XELAEV_18016934mg PE=1 SV=1 - [A0A1L8GWU8_XENLA]	3.91	7	2	2	2	1	1	1	665	71.9329	5.92236
A0A1L8GAQ2	XELAEV_18027752mg	Uncharacterized protein	Xenopus laevis	Uncharacterized protein OS=Xenopus laevis OX=8355 GN=XELAEV_18027752mg PE=1 SV=1 - [A0A1L8GAQ2_XENLA]	7.95	5	2	2	2	1	1	1	327	36.8432	5.43994
F6X9W9	taf15	TATA-box binding protein associated factor 15	Xenopus tropicalis	TATA-box binding protein associated factor 15 OS=Xenopus tropicalis OX=8364 GN=taf15 PE=3 SV=4 - [F6X9W9_XENTR]	5.54	4	1	2	2	1	1	1	487	51.7396	8.74854
A0A1L8ERX1	XELAEV_18043113mg	IF rod domain-containing protein	Xenopus laevis	IF rod domain-containing protein OS=Xenopus laevis OX=8355 GN=XELAEV_18043113mg PE=4 SV=1 - [A0A1L8ERX1_XENLA]	4.31	3	1	1	4	3	1	0.333333	441	47.7141	5.19873
A0A1L8HN70	gamt.S	Guanidinoacetate N-methyltransferase	Xenopus laevis	Guanidinoacetate N-methyltransferase OS=Xenopus laevis OX=8355 GN=gamt.S PE=3 SV=1 - [A0A1L8HN70_XENLA]	13.73	1	1	2	5	4	1	0.25	233	26.6442	5.60498
Q3KQ13	krt18.3.L	MGC131121 protein	Xenopus laevis	MGC131121 protein OS=Xenopus laevis OX=8355 GN=krt18.3.L PE=2 SV=1 - [Q3KQ13_XENLA]	2.91	2	1	1	2	2		0	378	42.9578	5.19873
Q08AW0	LOC100036826	LOC100036826 protein (Fragment)	Xenopus laevis	LOC100036826 protein (Fragment) OS=Xenopus laevis OX=8355 GN=LOC100036826 PE=2 SV=1 - [Q08AW0_XENLA]	3.87	7	1	1	1	1		0	413	44.8418	6.01123
Q6DE12	plin3.S	Perilipin	Xenopus laevis	Perilipin OS=Xenopus laevis OX=8355 GN=plin3.S PE=2 SV=1 - [Q6DE12_XENLA]	3.76	1	1	1	1	1		0	425	46.1541	5.5415
A0A1L8HC45	XELAEV_18011347mg	Uncharacterized protein	Xenopus laevis	Uncharacterized protein OS=Xenopus laevis OX=8355 GN=XELAEV_18011347mg PE=3 SV=1 - [A0A1L8HC45_XENLA]	2.91	1	1	1	1	1		0	584	63.5761	8.22119
A0A1L8ERS0	XELAEV_18043128mg	IF rod domain-containing protein	Xenopus laevis	IF rod domain-containing protein OS=Xenopus laevis OX=8355 GN=XELAEV_18043128mg PE=3 SV=1 - [A0A1L8ERS0_XENLA]	6.52	3	1	1	1	1		0	414	45.3957	5.47803
A0A1B8Y9M8	XENTR_v90028528mg	IF rod domain-containing protein	Xenopus tropicalis	IF rod domain-containing protein OS=Xenopus tropicalis OX=8364 GN=XENTR_v90028528mg PE=3 SV=1 - [A0A1B8Y9M8_XENTR]	2.86	2	1	1	1	1		0	385	43.3444	5.66846
